# Supplementary material for: First sequential Mukaiyama–Michael reaction/crossed-Claisen condensation using two molar ketene silyl acetals and one molar α,β-unsaturated esters promoted by a NaOH catalyst
Source: Royal Society of Chemistry journal article supplement (doi:10.1039/c0cc01110j), 2010-01-01

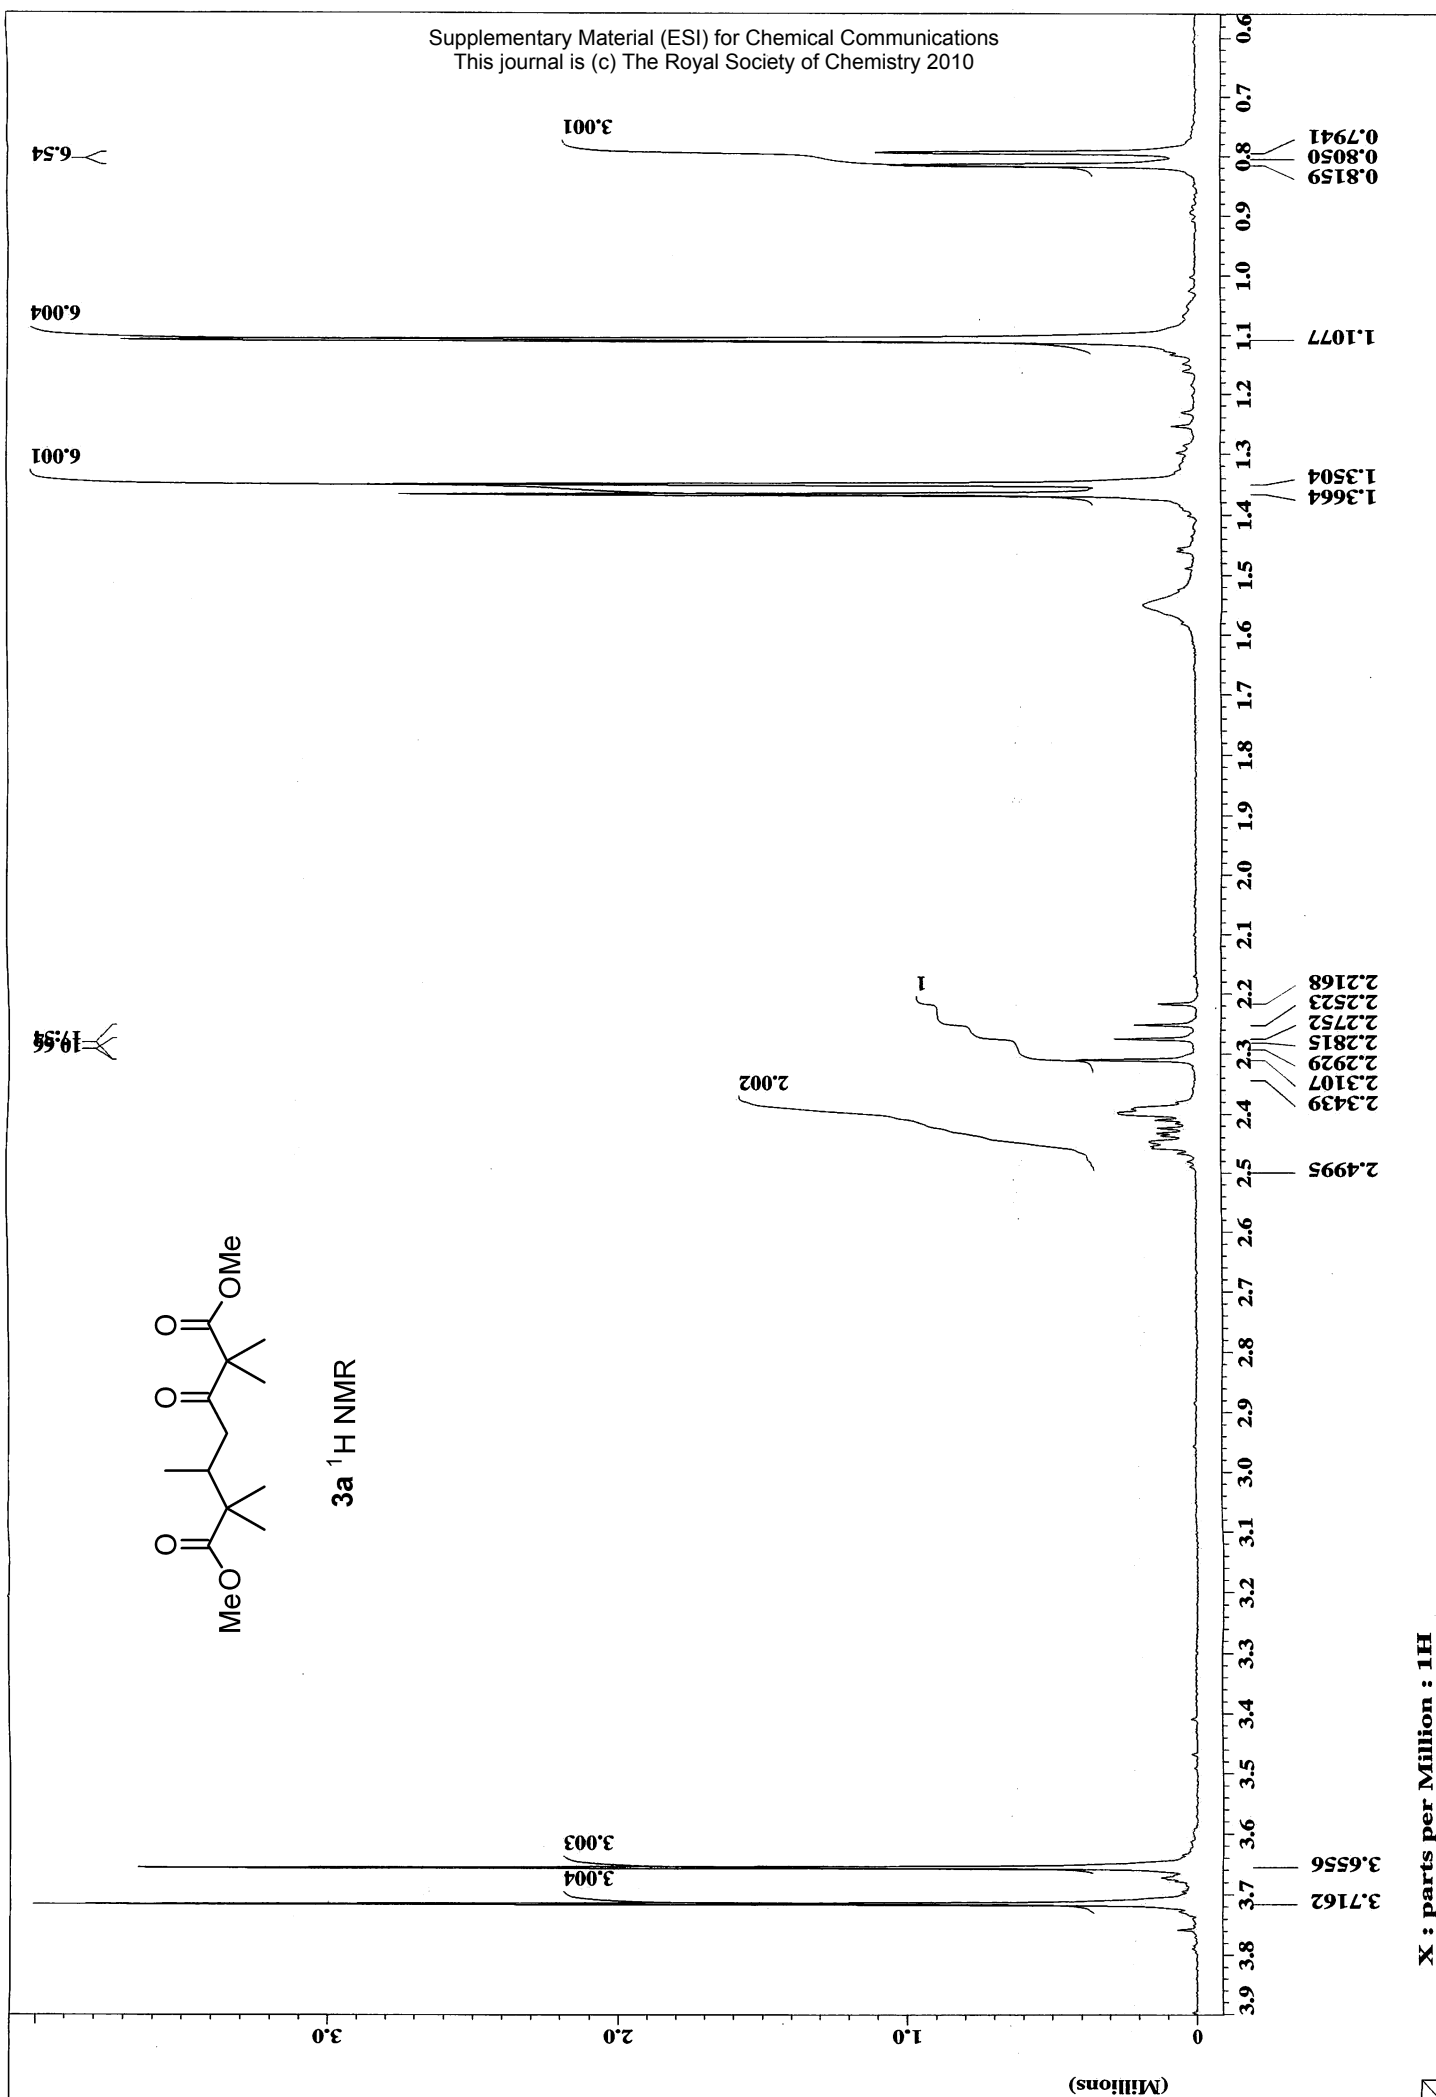

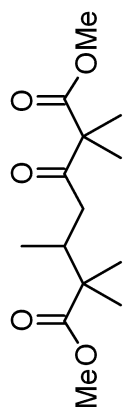

**3a**  $^{13}\text{C}$  NMR

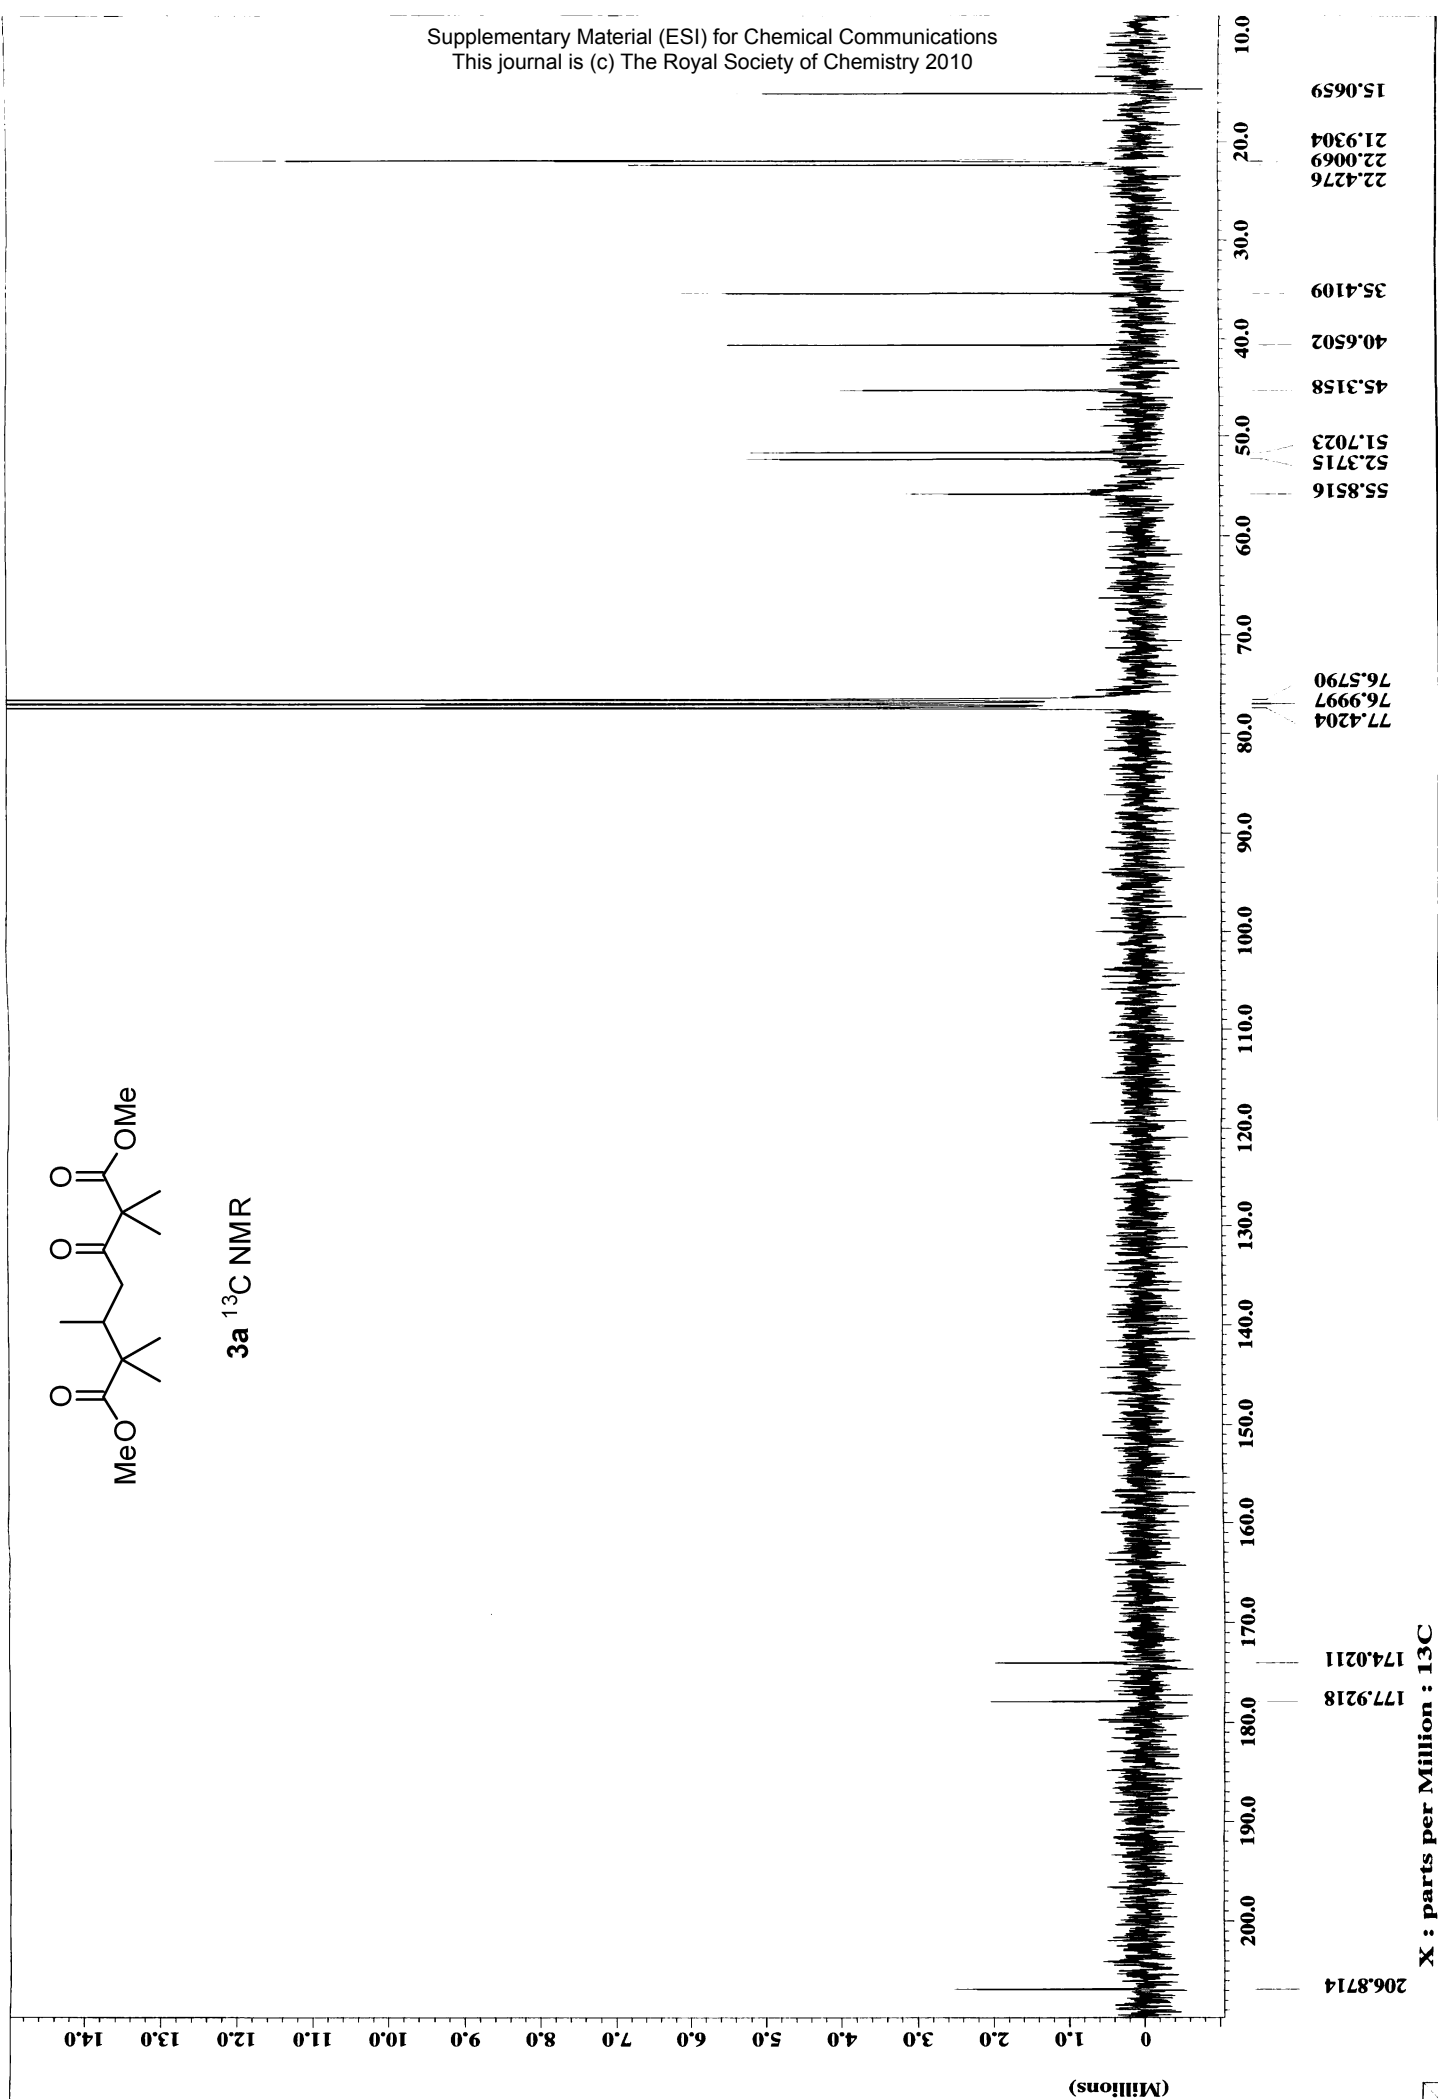

Filename = single\_pulse-2127.jdf  
 Author = delta  
 Experiment = single\_pulse.ex2  
 Sample\_id = YN-382-1H  
 Solvent = CHLOROFORM-D  
 Creation\_time = 7-APR-2009 20:14:27  
 Revision\_time = 7-APR-2009 20:22:41  
 Current\_time = 7-APR-2009 20:22:49  
 Comment = single\_pulse  
 Data\_format = 1D REAL  
 Dim\_size = 13107  
 Dim\_title = 1H  
 Dim\_units = [ppm]  
 Dimensions = X  
 Site = ECA300 (2 JMT30-2)  
 Spectrometer = DELTA2\_NMR  
 Field\_strength = 7.0586013 [T] (300 [MHz]  
 X\_acq\_duration = 2.90717696 [s]  
 X\_domain = 1H  
 X\_freq = 300.52965592 [MHz]  
 X\_offset = 5 [ppm]  
 X\_points = 16384  
 X\_resolution = 0  
 X\_prescans = 0  
 X\_resolution [Hz] = 0.34397631 [Hz]  
 X\_sweep = 5.63570784 [kHz]  
 Irr\_domain = 1H  
 Irr\_freq = 300.52965592 [MHz]  
 Irr\_offset = 5 [ppm]  
 Tri\_domain = 1H  
 Tri\_freq = 300.52965592 [MHz]  
 Tri\_offset = 5 [ppm]  
 Clipped = FALSE  
 Mod\_return = 1  
 Scans = 8  
 Total\_scans = 8  
 X\_90\_width = 11.4 [us]  
 X\_acq\_time = 2.90717696 [s]  
 X\_angle = 45 [deg]  
 X\_atn = 6.4 [dB]  
 X\_pulse = 5.7 [us]  
 Irr\_mode = Off  
 Tri\_mode = Off  
 Dante\_presat = FALSE  
 Initial\_wait = 1 [s]  
 Recvr\_gain = 52  
 Relaxation\_delay = 5 [s]  
 Repetition\_time = 7.90717696 [s]  
 Temp\_get = 403.8 [dC]

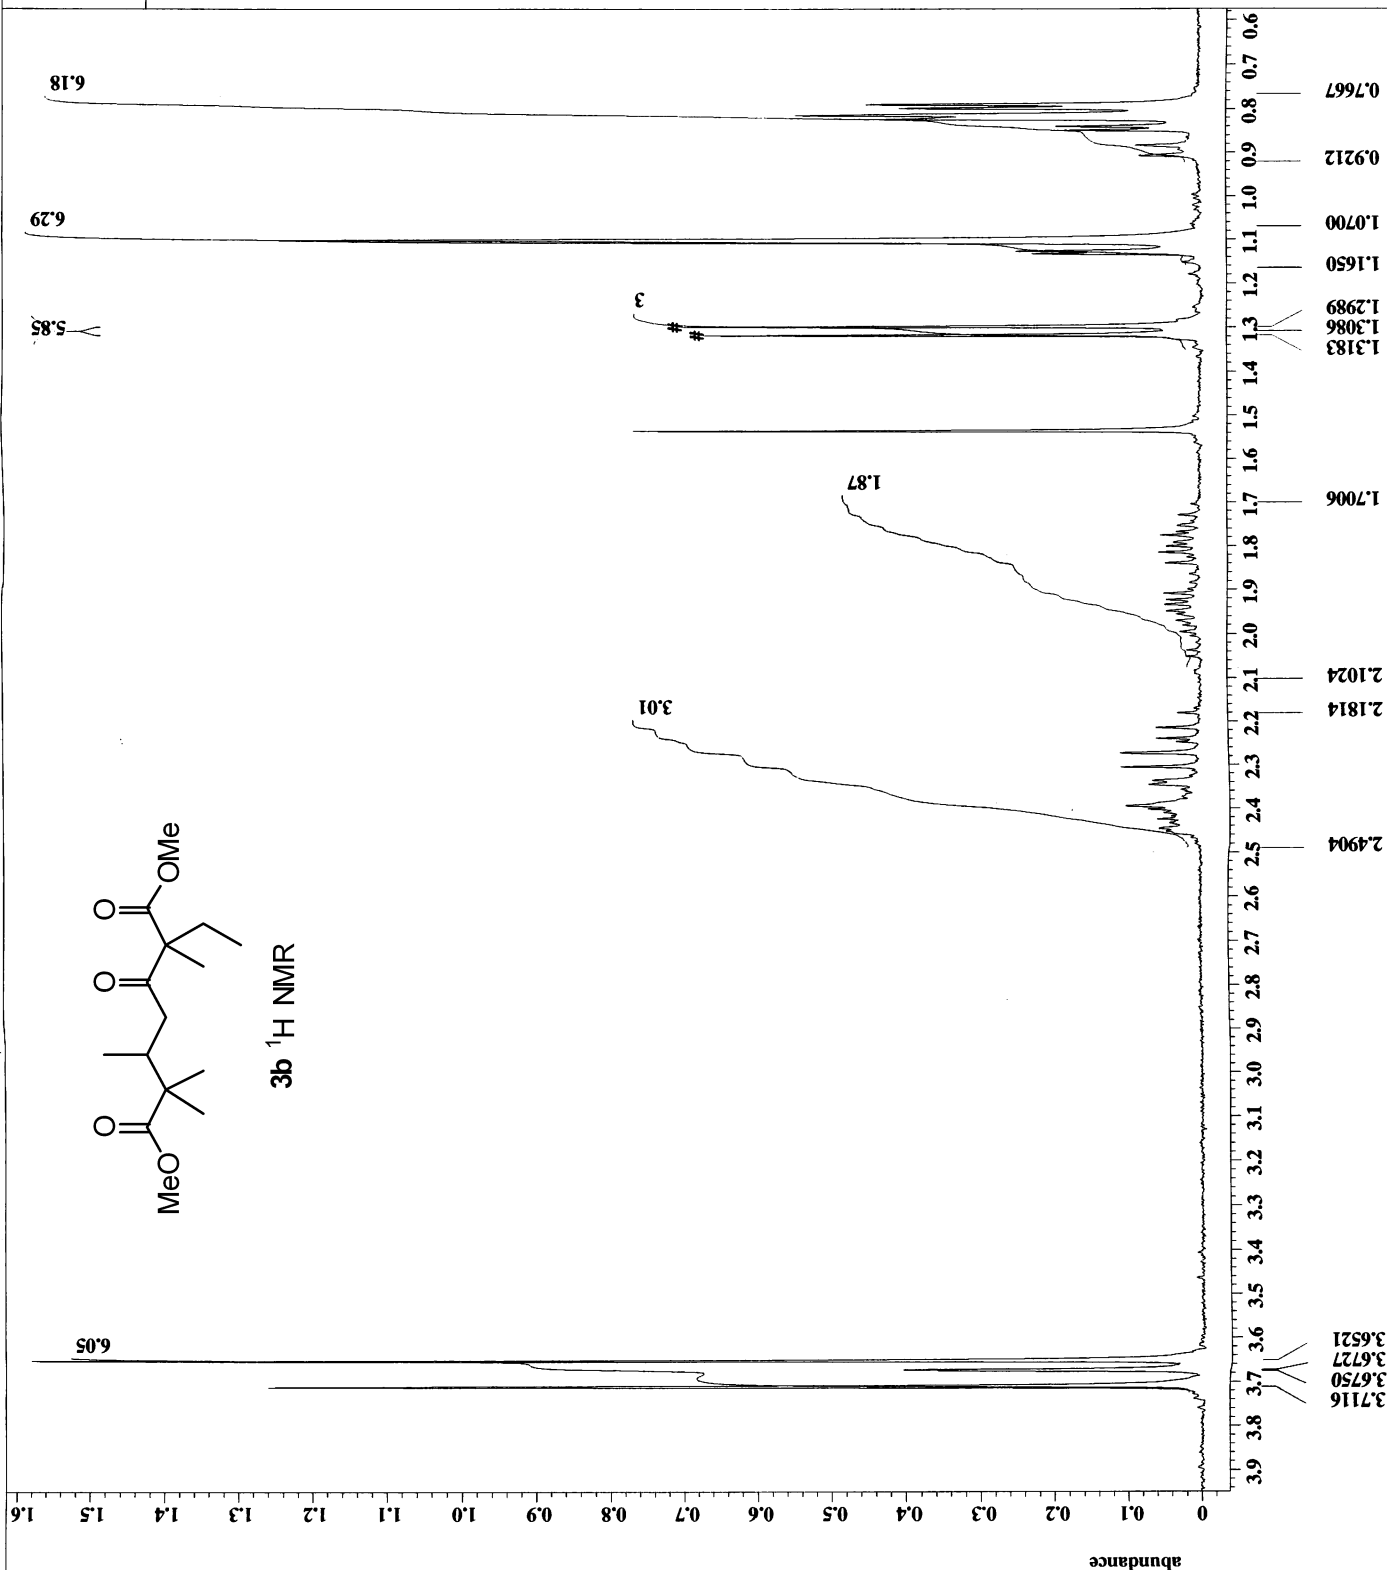

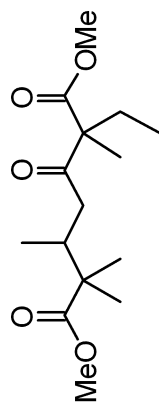

**3b** <sup>13</sup>C NMR

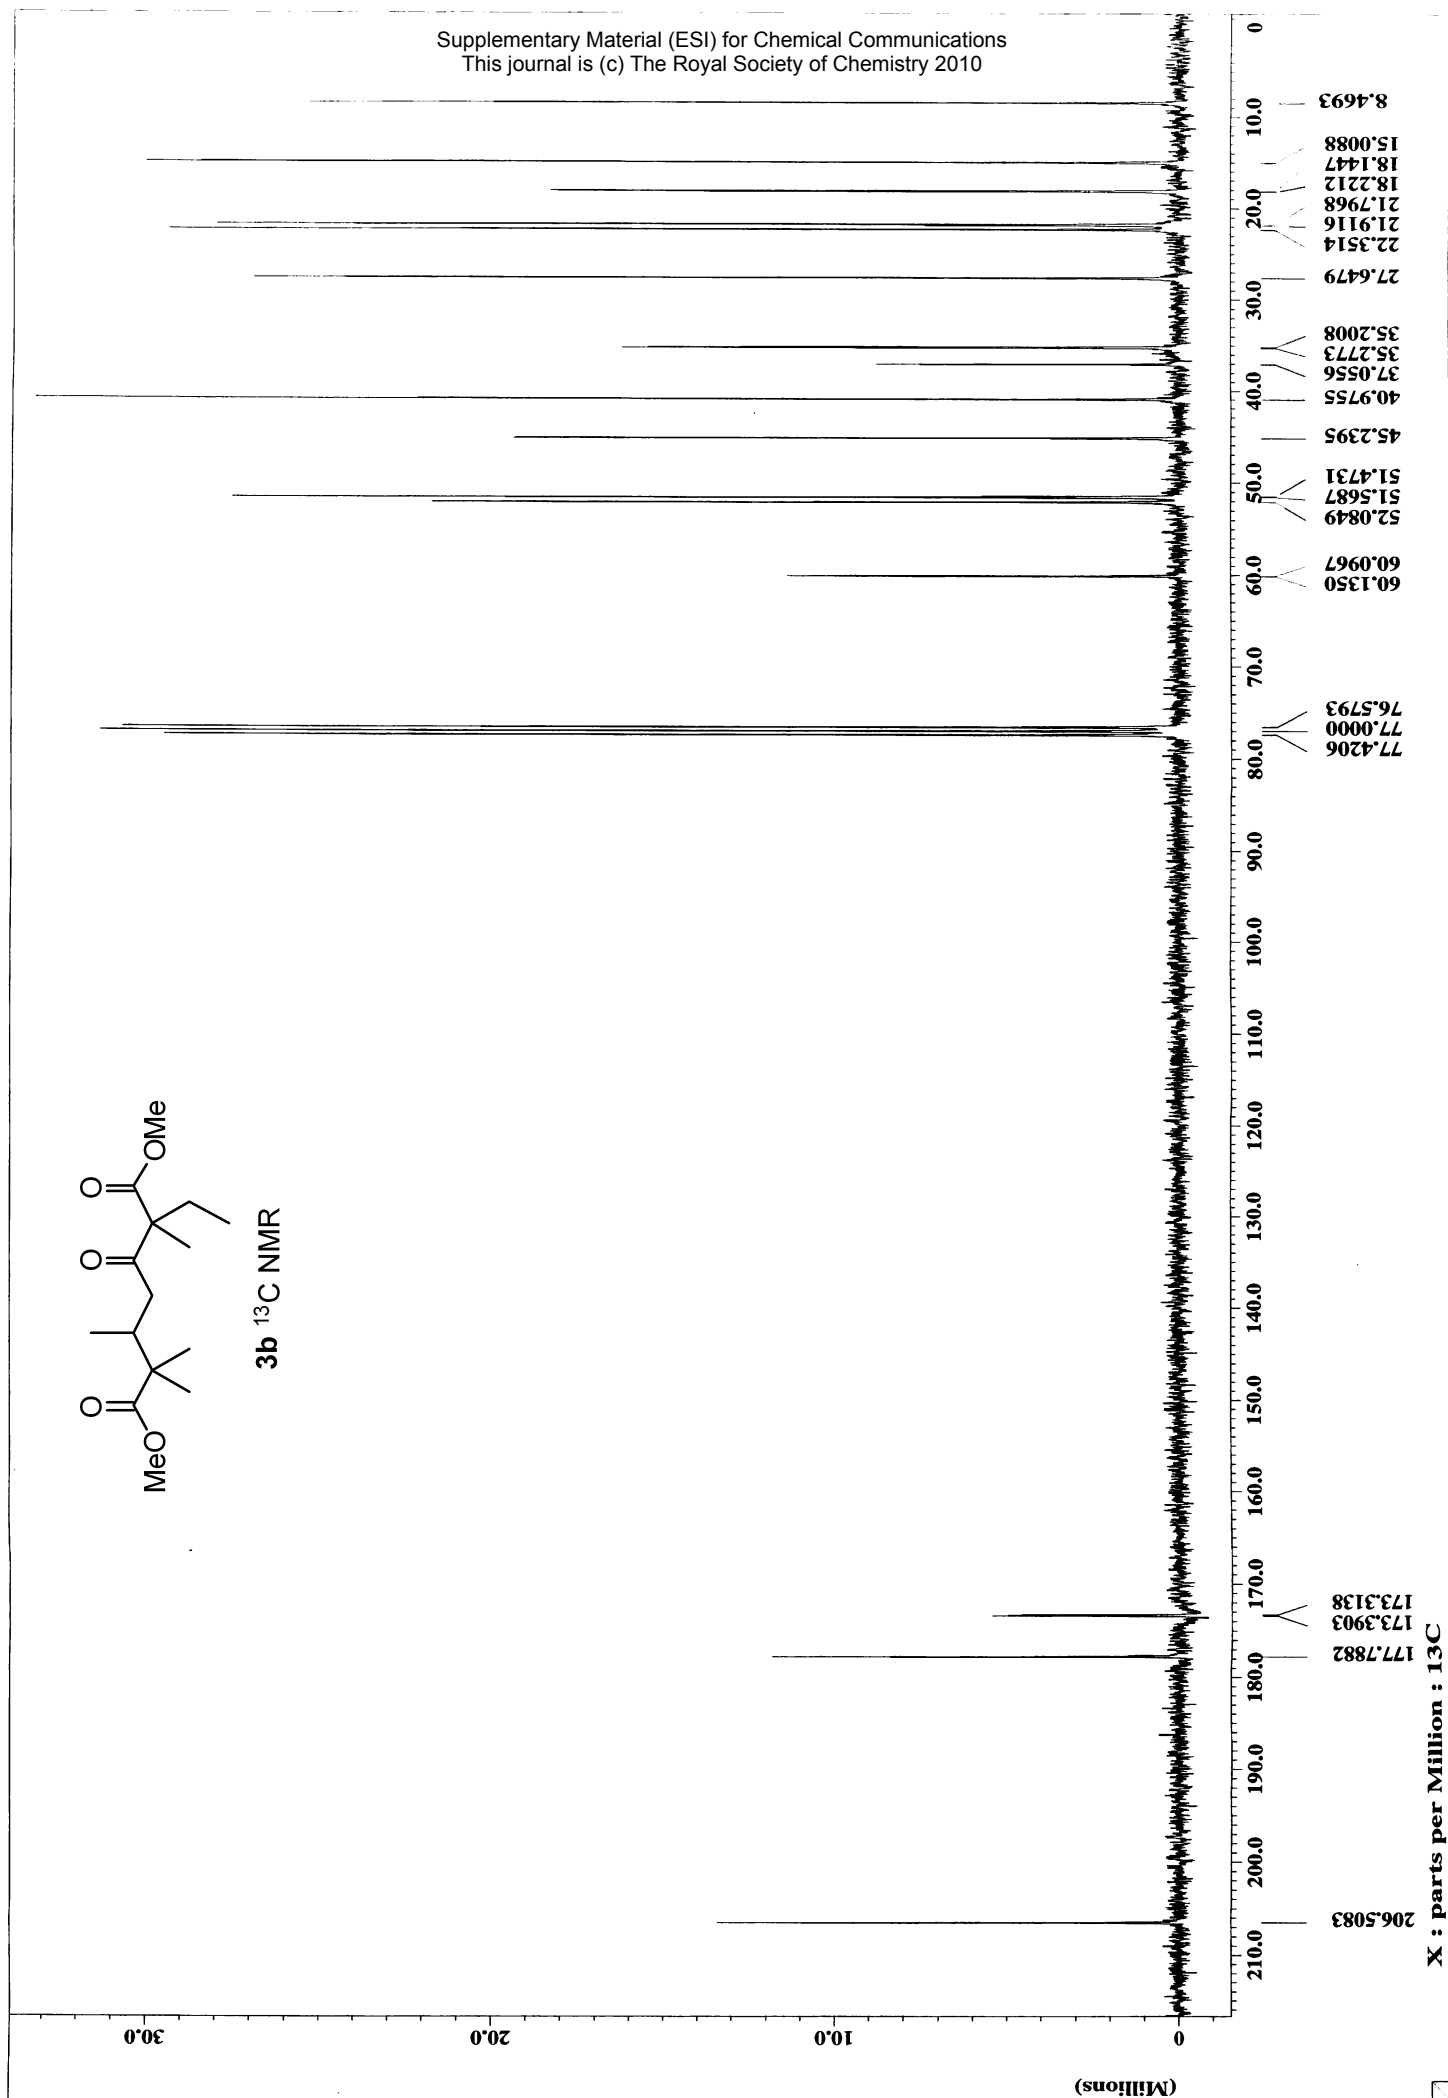

6.88

9.02

6.06

3.07

3.01

3

2.08

1.04

0.8273  
0.8159  
0.8044

1.1146

1.2863  
1.3115

1.4443

2.2180

2.3702  
2.3736

2.5064

3.6521

X : parts per Million : 1H

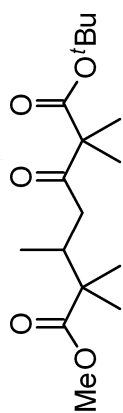

3c <sup>1</sup>H NMR

abundance

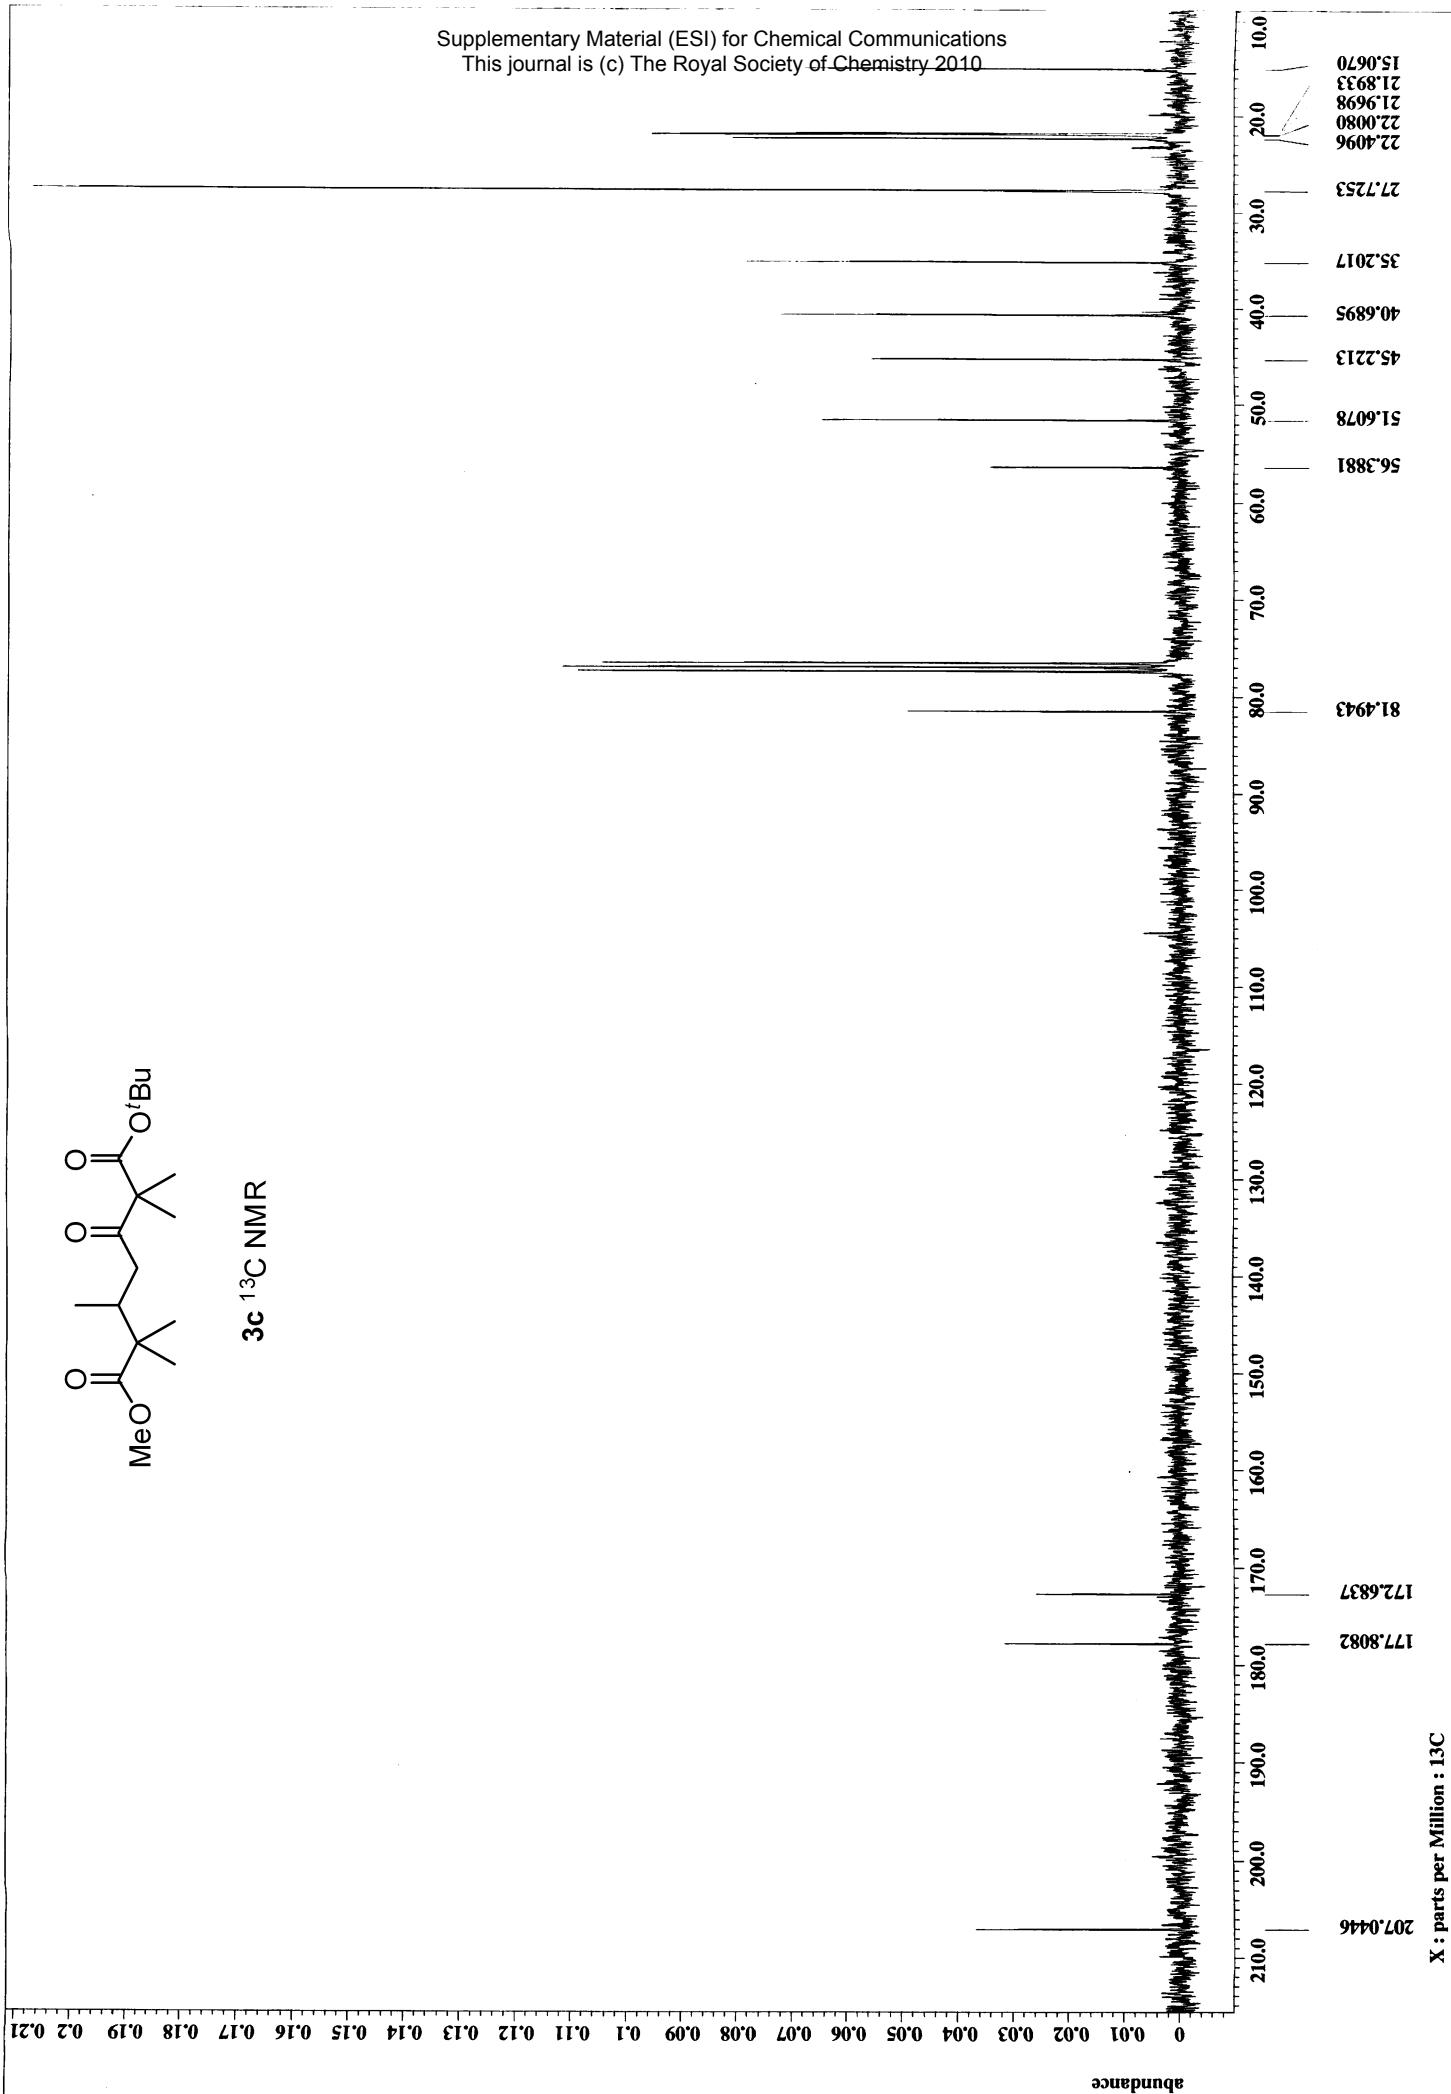

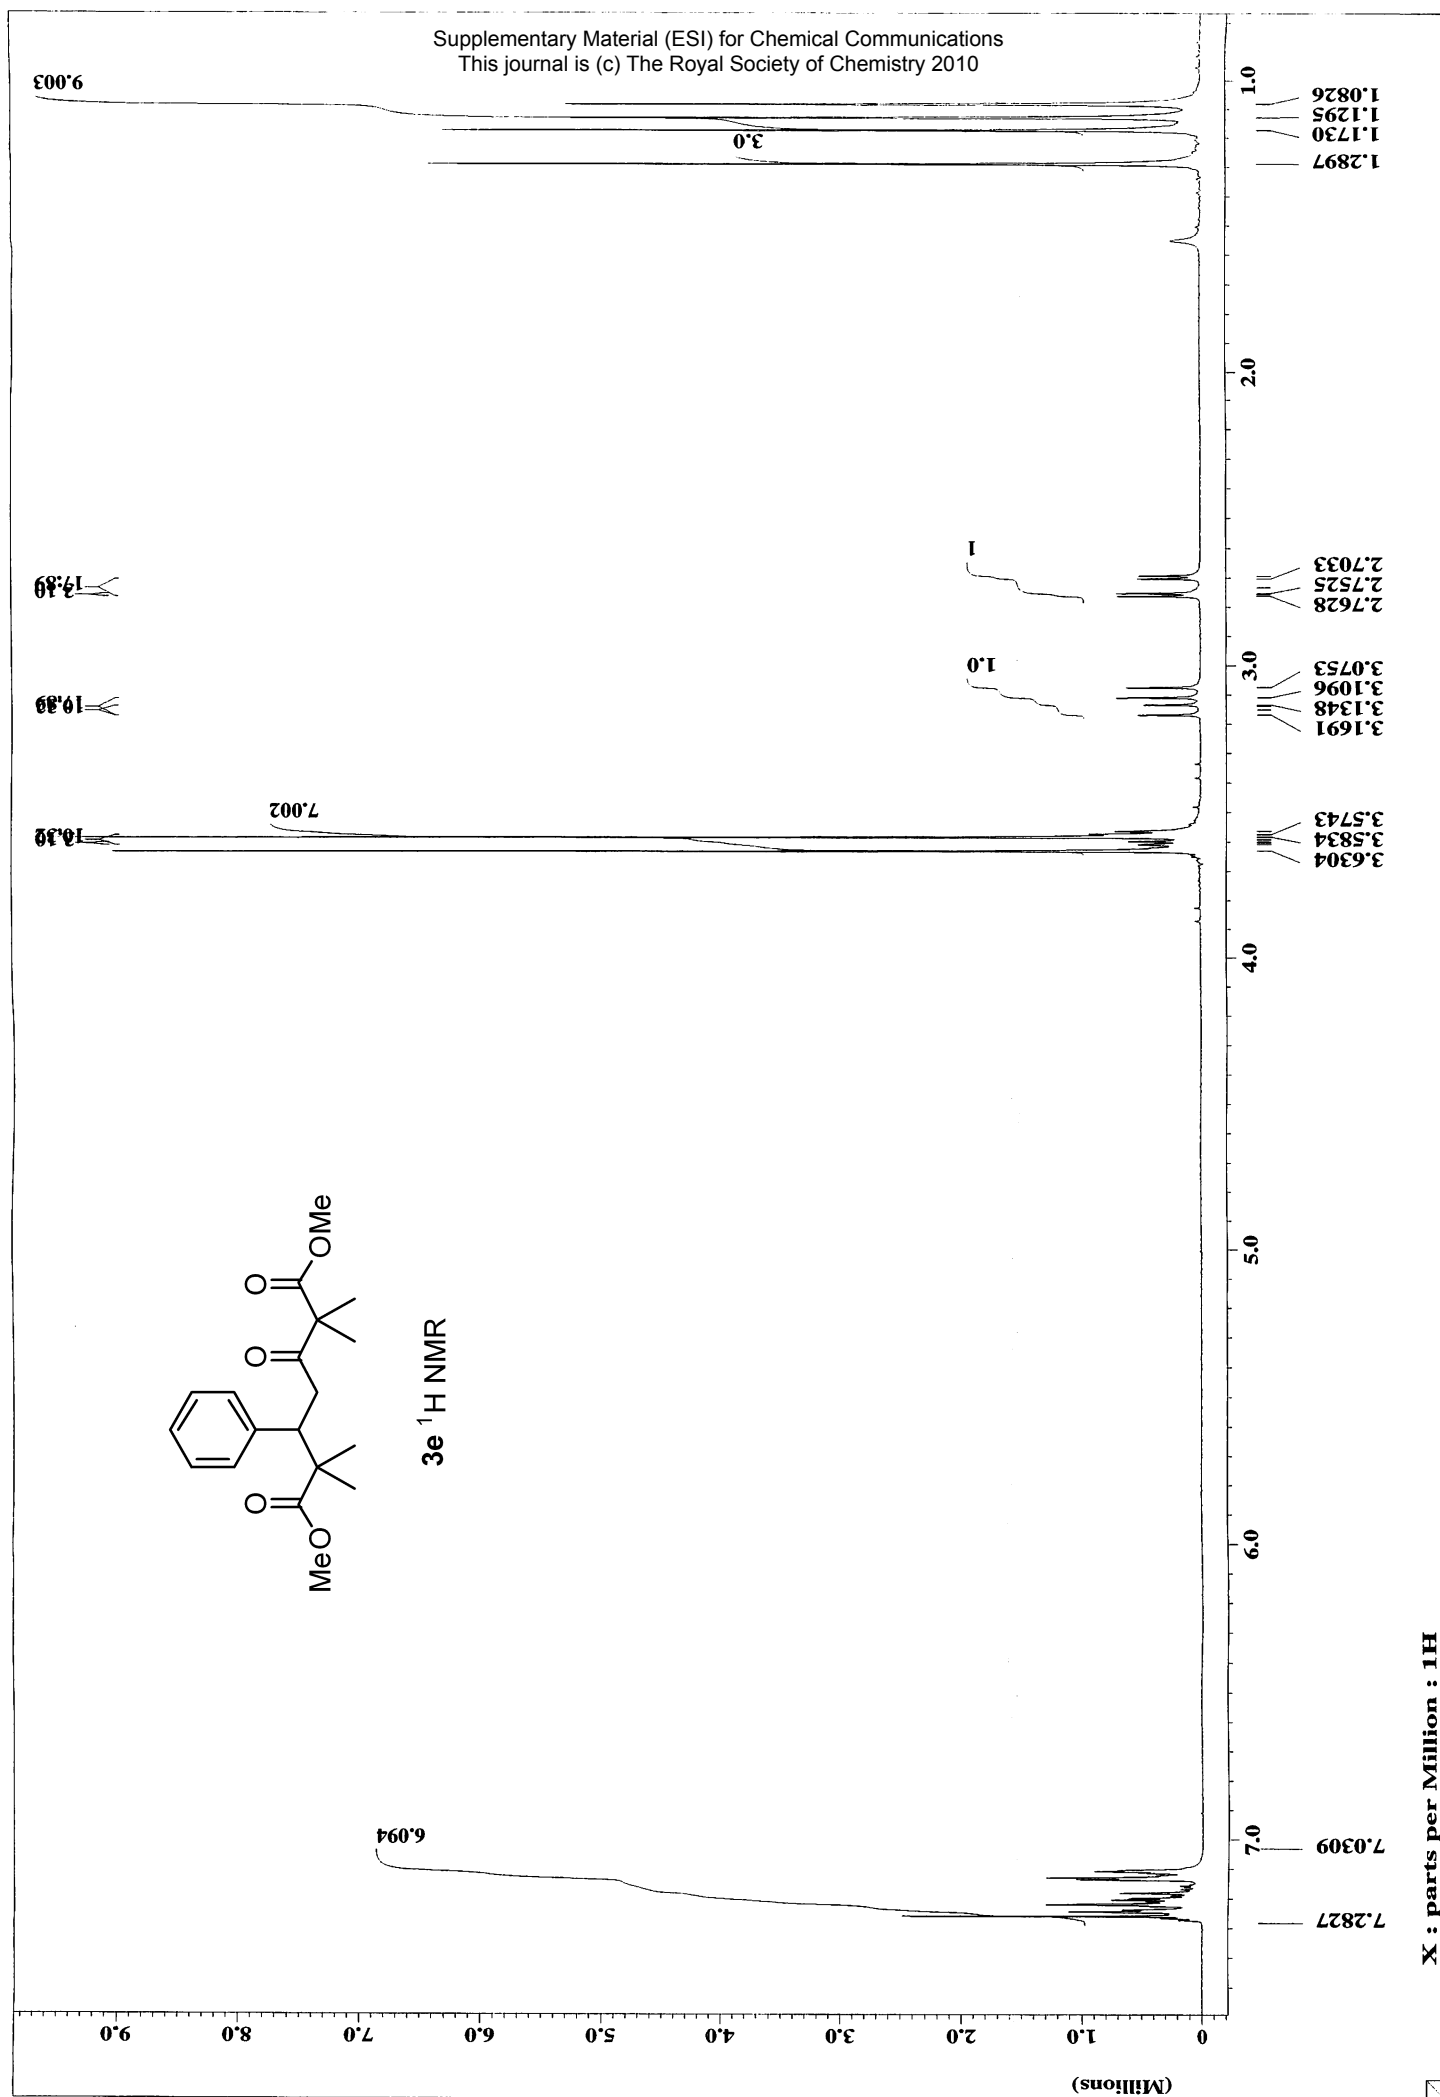

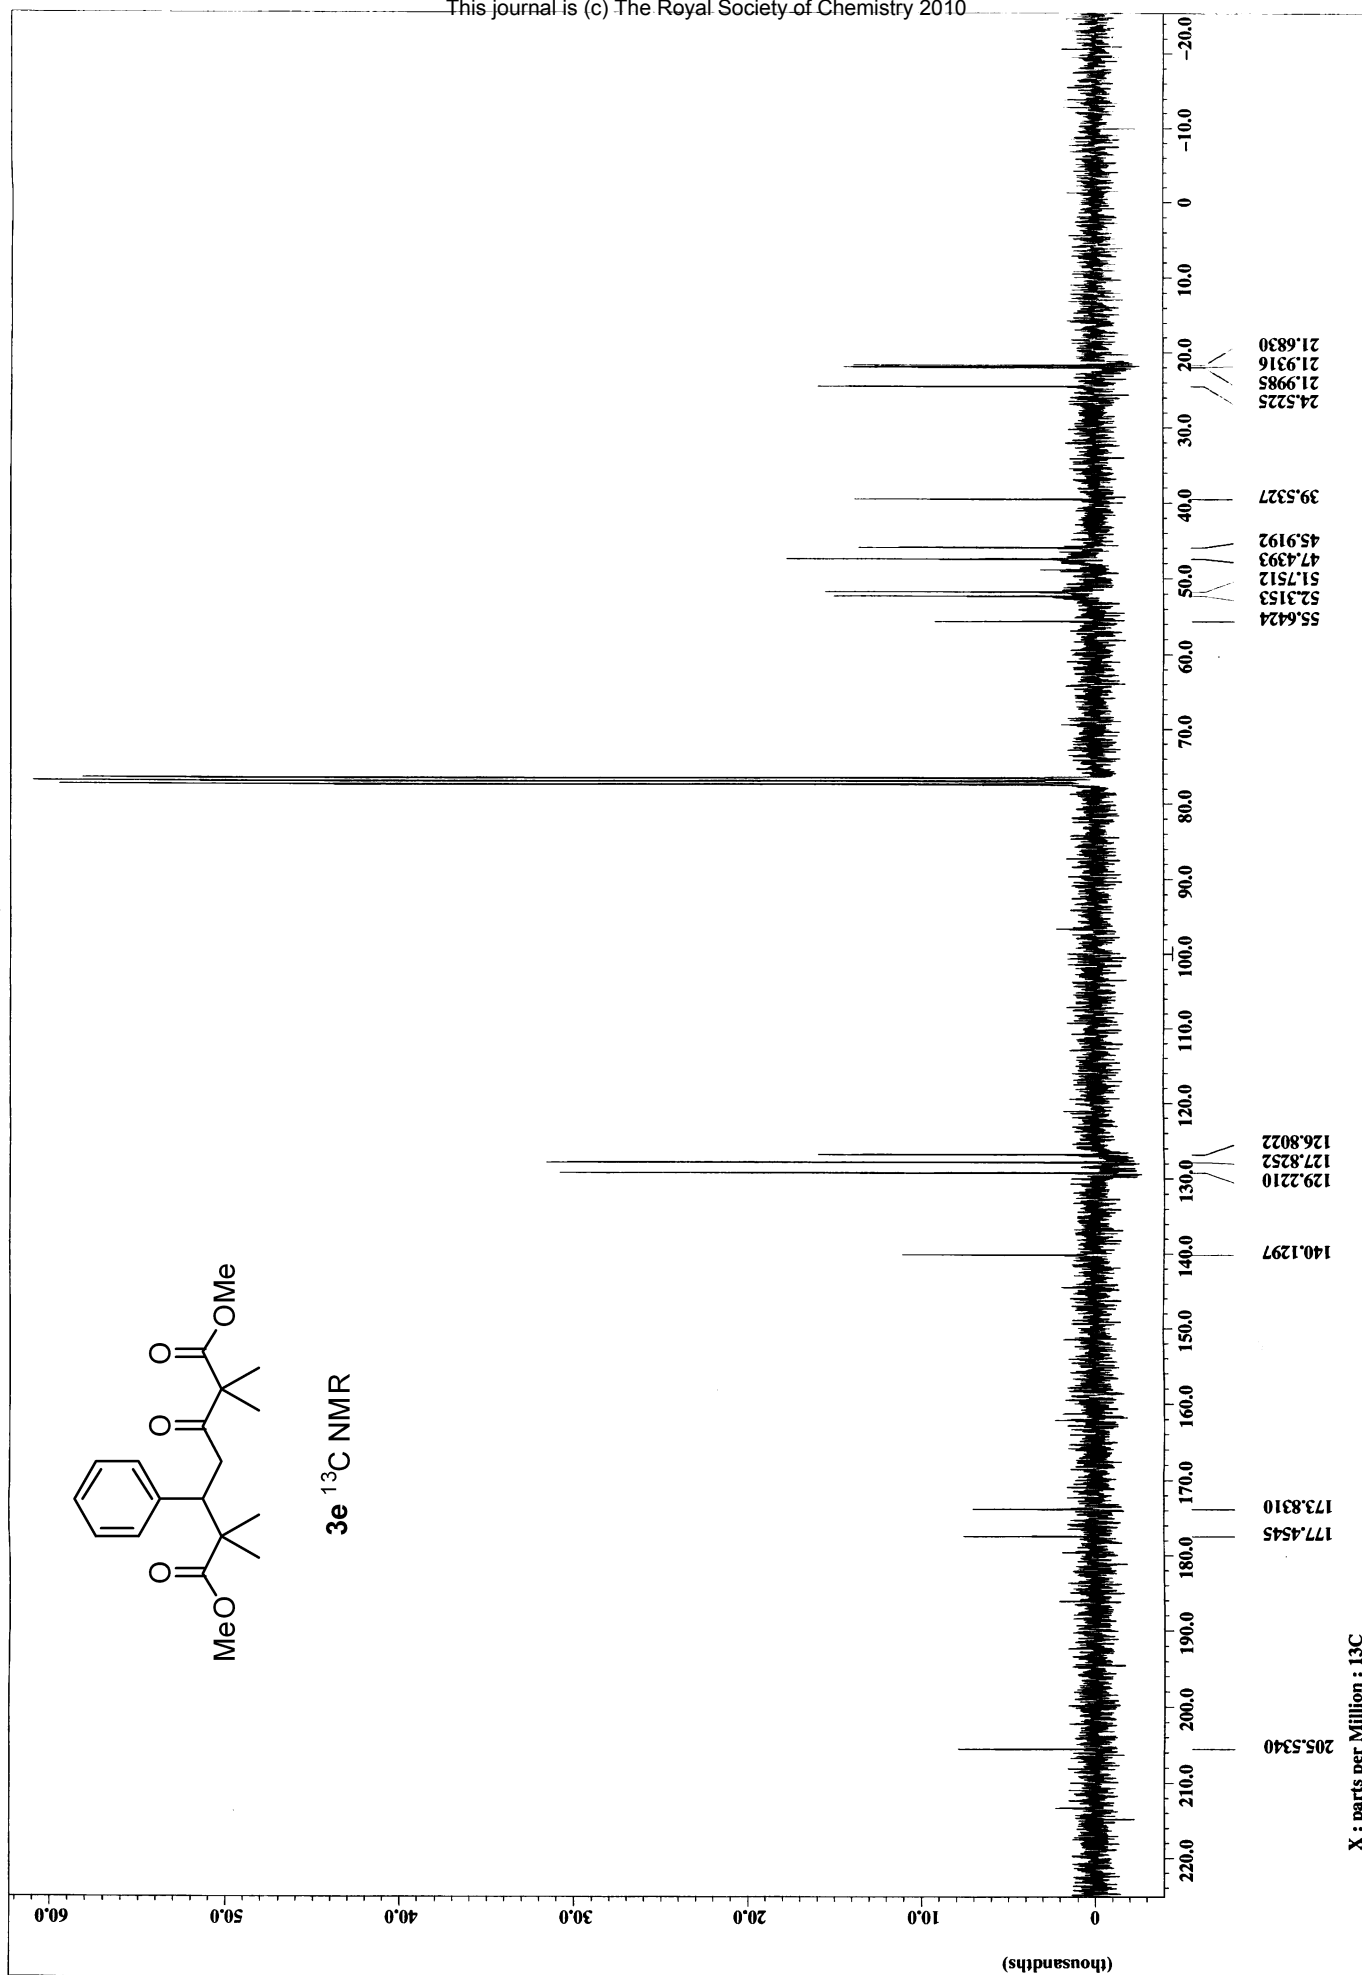



Filename = YN-340-1H-6.fdf  
 Author = delta  
 Experiment = single\_pulse.ex2  
 Sample\_id = YN-340-1H  
 Solvent = CHLOROFORM-D  
 Creation\_time = 16-MAR-2009 17:30:12  
 Revision\_time = 6-MAY-2009 19:42:04  
 Current\_time = 6-MAY-2009 19:42:27  
 Comment = single\_pulse  
 Data\_format = 1D REAL  
 Dim\_size = 13107  
 Dim\_title = 1H  
 Dim\_units = [ppm]  
 Dimensions = x  
 Site = ECA300 (2 JMT30-2)  
 Spectrometer = DELTA2\_NMR  
 Field\_strength = 7.0586013[T] (300[MHz]  
 X\_acq\_duration = 2.90717696[s]  
 X\_domain = 1H  
 X\_freq = 300.52965592[MHz]  
 X\_offset = 5[ppm]  
 X\_points = 16384  
 X\_prescans = 0  
 X\_resolution = 0.34397631[Hz]  
 X\_sweep = 5.63570784[kHz]  
 Irr\_domain = 1H  
 Irr\_freq = 300.52965592[MHz]  
 Irr\_offset = 5[ppm]  
 Tri\_domain = 1H  
 Tri\_freq = 300.52965592[MHz]  
 Tri\_offset = 5[ppm]  
 Clipped = FALSE  
 Mod\_return = 1  
 Scans = 8  
 Total\_scans = 8  
 X\_90\_width = 11.4[us]  
 X\_acq\_time = 2.90717696[s]  
 X\_angle = 45[deg]  
 X\_atn = 6.4[db]  
 X\_pulse = 5.7[us]  
 Irr\_mode = Off  
 Tri\_mode = Off  
 Dante\_preat = FALSE  
 Initial\_wait = 1[s]  
 Recvr\_gain = 44  
 Relaxation\_delay = 5[s]  
 Repetition\_time = 7.90717696[s]  
 Temp\_get = 25[dc]

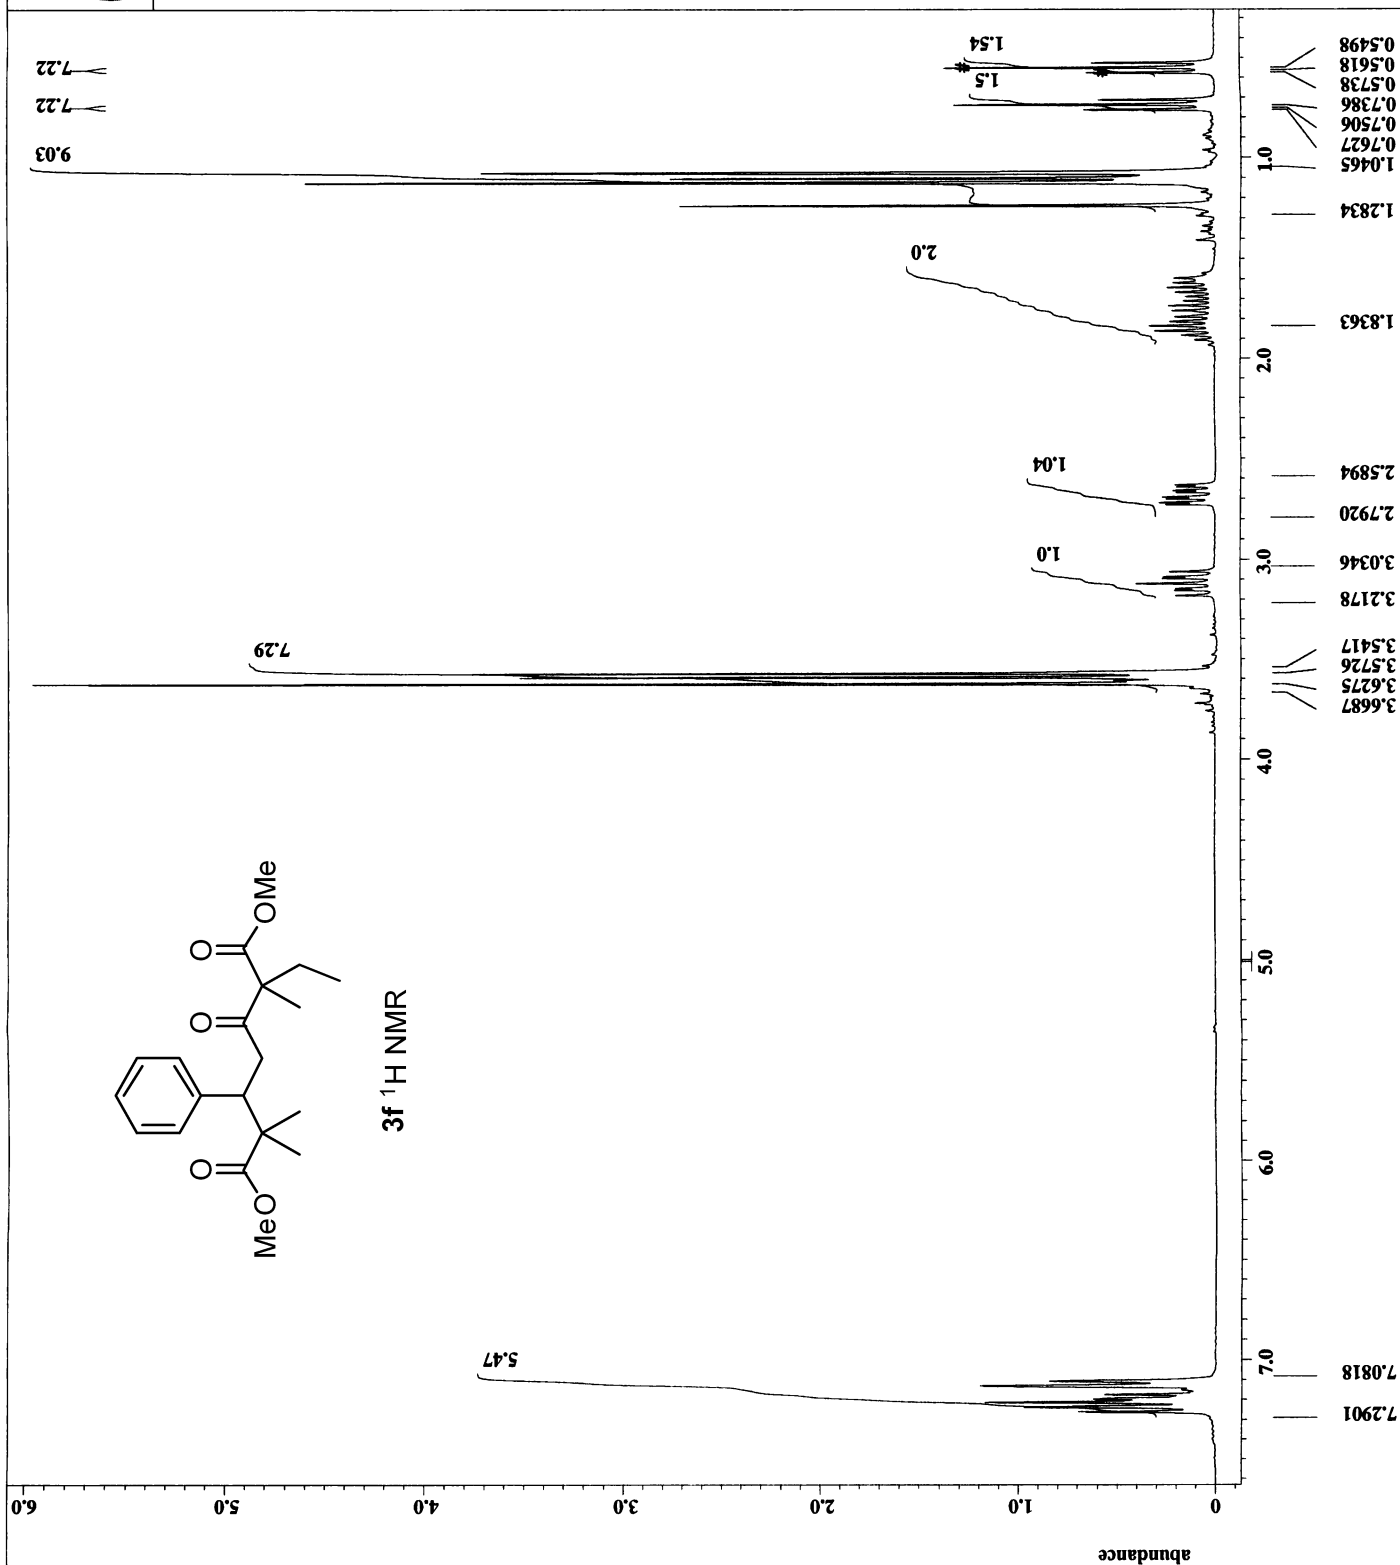

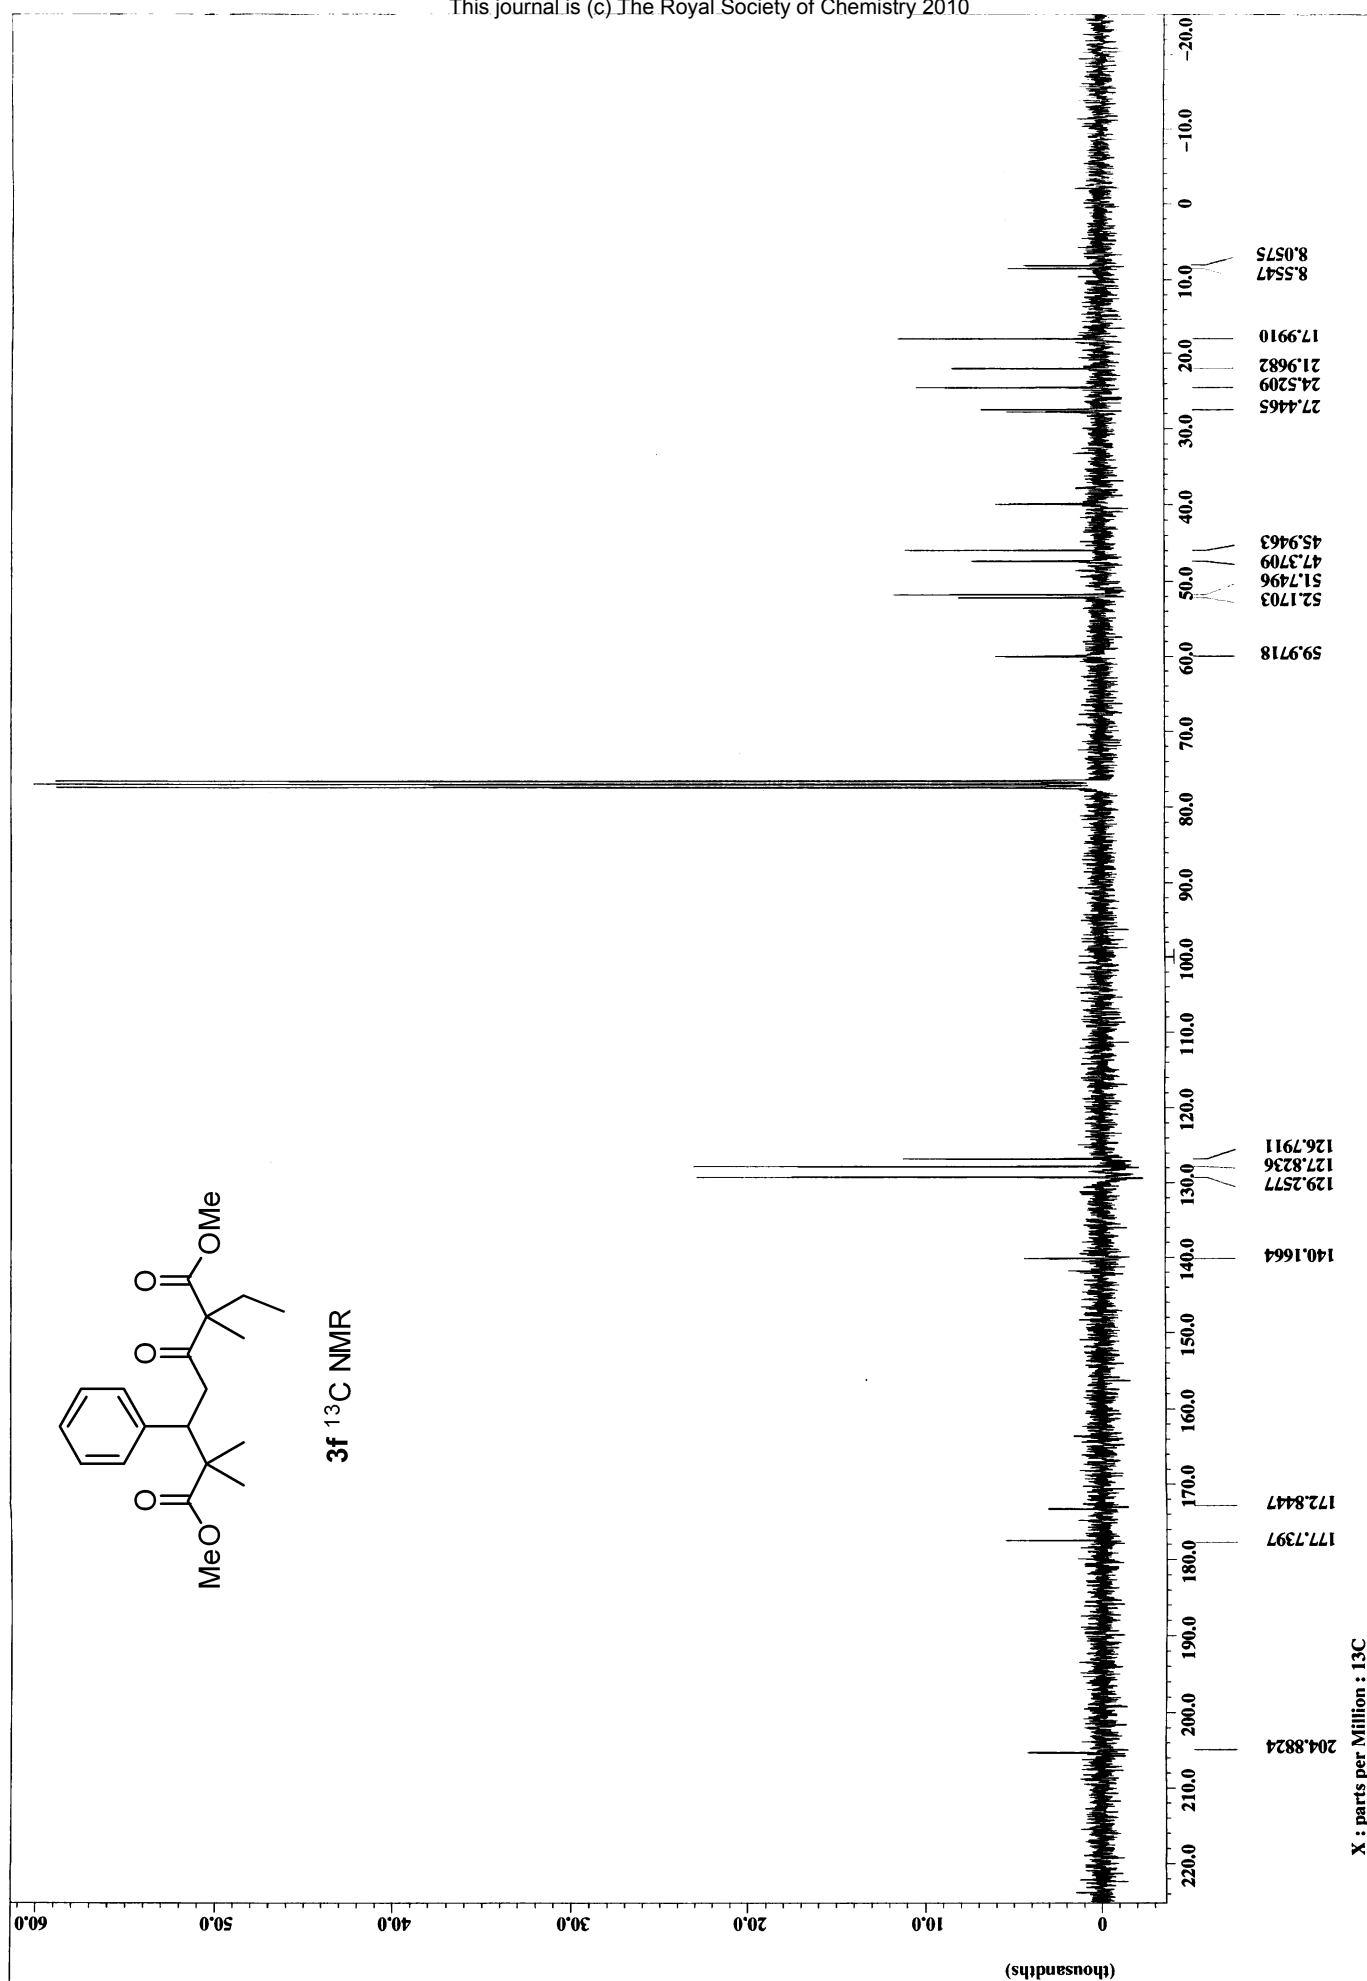

Filename = HT-613-1H-3.jdf  
 Author = delta  
 Experiment = single\_pulse.ex2  
 Sample\_id = HT-613-1H  
 Solvent = CHLOROFORM-D  
 Creation\_time = 30-JUL-2009 13:37:01  
 Revision\_time = 26-AUG-2009 11:09:34  
 Current\_time = 26-AUG-2009 11:10:00  
 Comment = single\_pulse  
 Data\_format = 1D REAL  
 Dim\_size = 13107  
 Dim\_title = 1H  
 Dim\_units = [ppm]  
 Dimensions = X  
 Site = ECA300 (2 JMT30-2)  
 Spectrometer = DELTA2\_NMR  
 Field\_strength = 7.0586013[T] (300 [MHz]  
 X\_acq\_duration = 2.90717696[s]  
 X\_domain = 1H  
 X\_freq = 300.52965592[MHz]  
 X\_offset = 5[ppm]  
 X\_points = 16384  
 X\_prescans = 0  
 X\_resolution = 0.34397631[Hz]  
 X\_sweep = 5.63570784[kHz]  
 Irr\_domain = 1H  
 Irr\_freq = 300.52965592[MHz]  
 Irr\_offset = 5[ppm]  
 Tri\_domain = 1H  
 Tri\_freq = 300.52965592[MHz]  
 Tri\_offset = 5[ppm]  
 Clipped = FALSE  
 Mod\_return = 1  
 Scans = 8  
 Total\_scans = 8  
 X\_90\_width = 12.5[us]  
 X\_acq\_time = 2.90717696[s]  
 X\_angle = 45[deg]  
 X\_atn = 6.4[db]  
 X\_pulse = 6.25[us]  
 Irr\_mode = Off  
 Irr\_mode = Off  
 Dante\_presat = FALSE  
 Initial\_wait = 1[s]  
 Recvr\_gain = 34  
 Relaxation\_delay = 5[s]  
 Repetition\_time = 7.90717696[s]  
 Temp\_get = 24.1[dc]

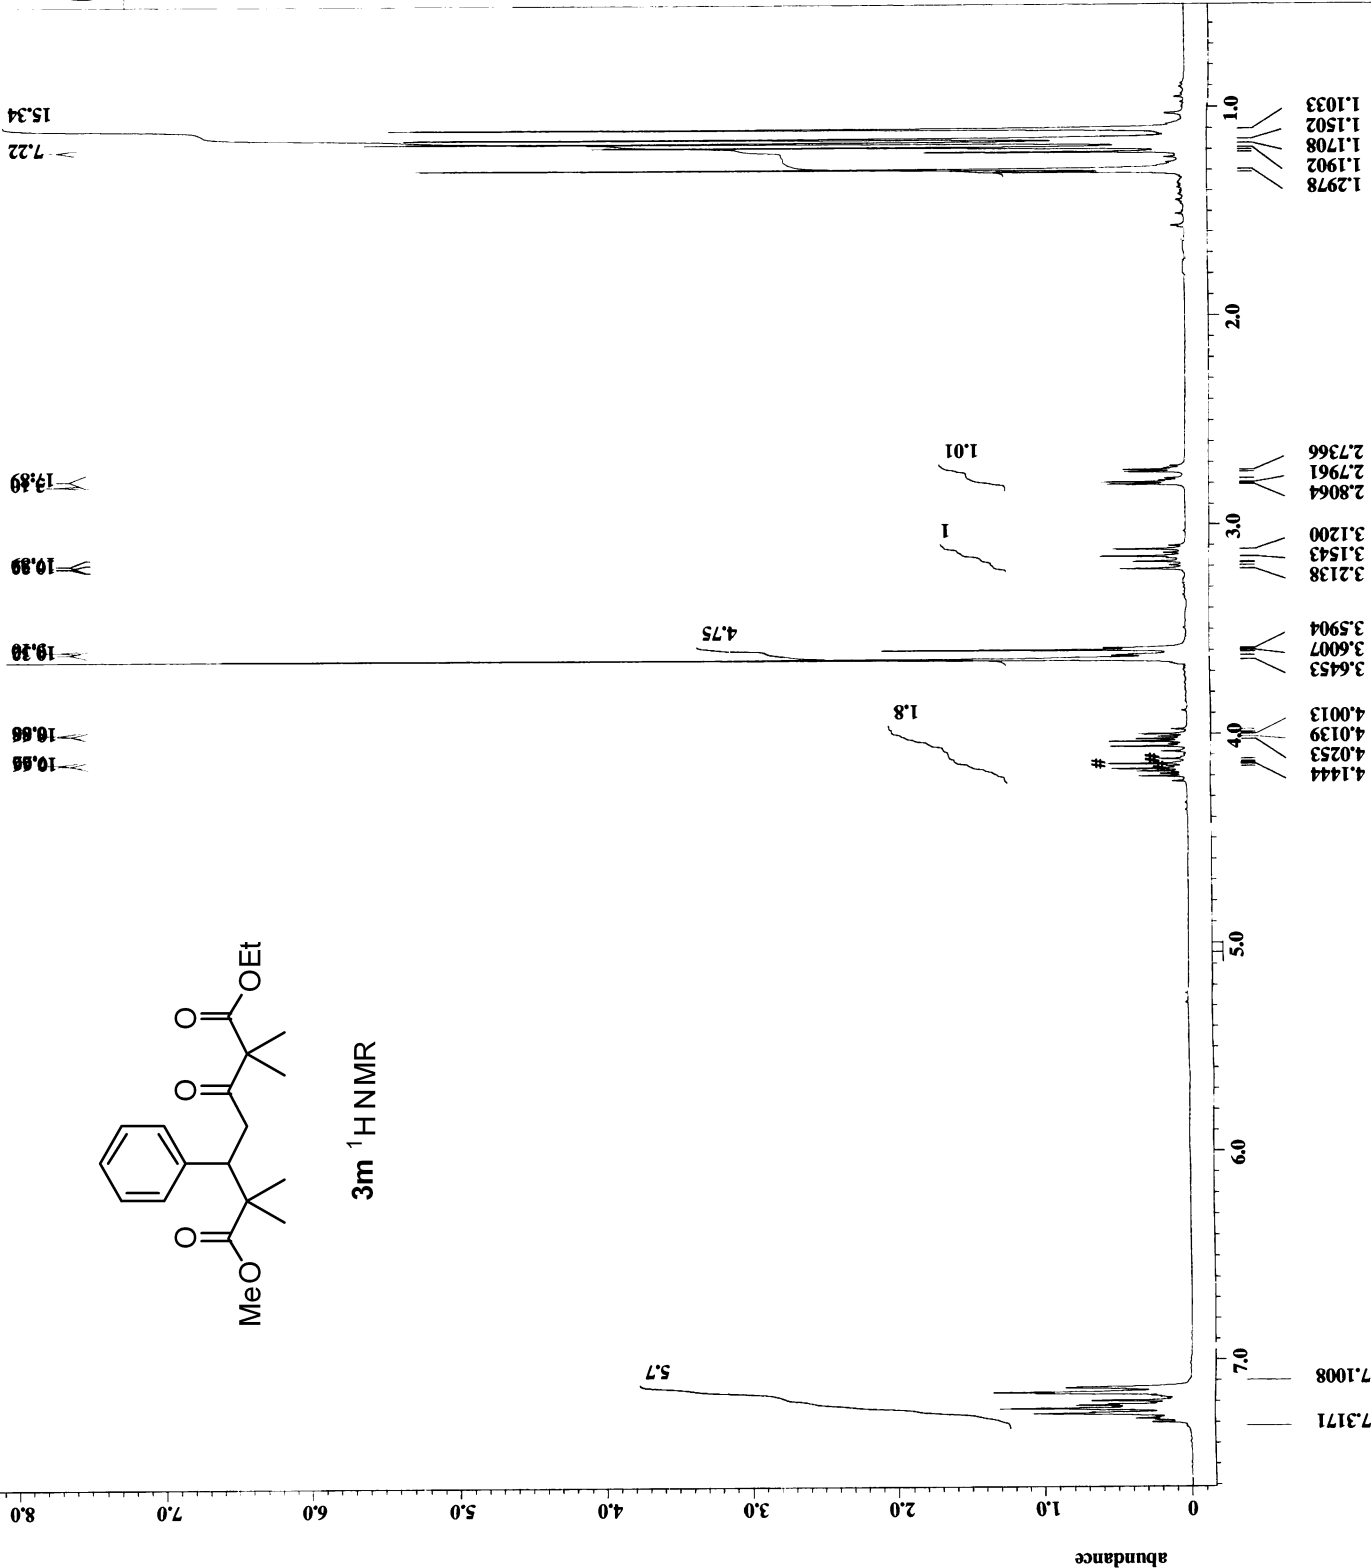

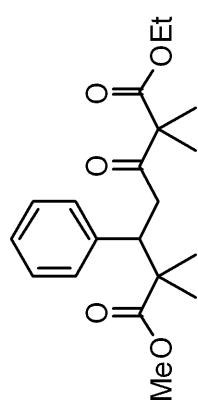

3m  $^{13}\text{C}$  NMR

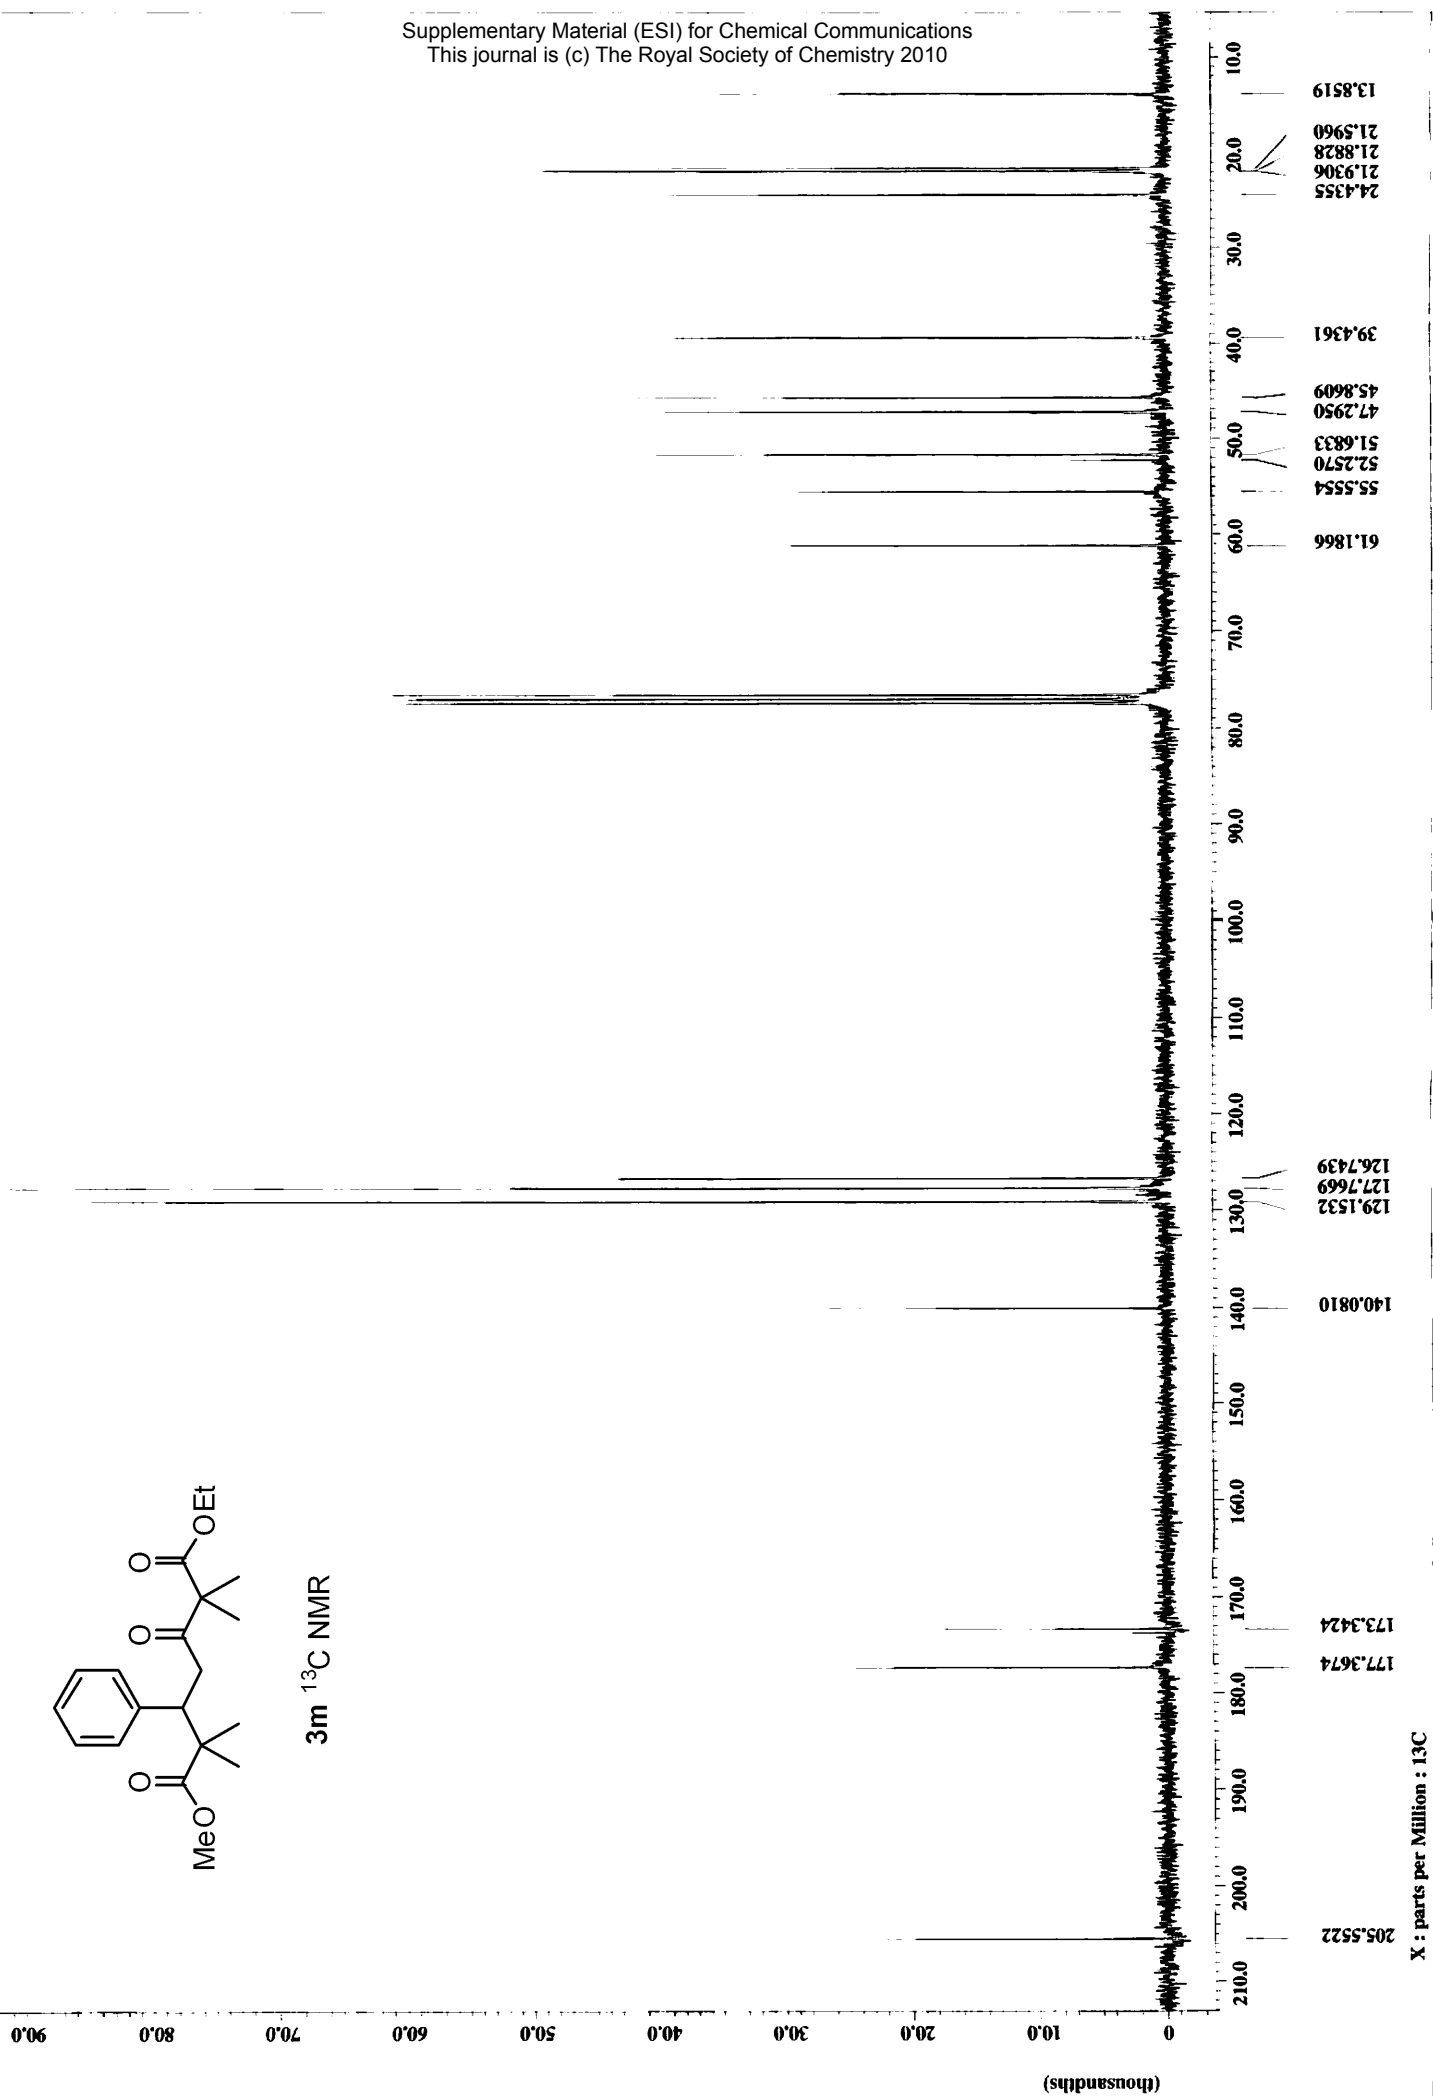

Filename = HT-612-1H-3.fdf  
 Author = delta  
 Experiment = single\_pulse.ex2  
 Sample\_id = HT-612-1H  
 Solvent = CHLOROFORM-D  
 Creation\_time = 29-JUL-2009 15:00:09  
 Revision\_time = 26-AUG-2009 16:46:28  
 Current\_time = 26-AUG-2009 16:46:34  
 Comment = single\_pulse  
 Data\_format = 1D REAL  
 Dim\_size = 13107  
 Dim\_title = 1H  
 Dim\_units = [ppm]  
 Dimensions = X  
 Site = ECA300 (2 JMT30-2)  
 Spectrometer = DELTA2\_NMR  
 Field\_strength = 7.0586013 [T] (300 [MHz]  
 X\_acq\_duration = 2.90717696 [s]  
 X\_domain = 1H  
 X\_freq = 300.52965592 [MHz]  
 X\_offset = 5 [ppm]  
 X\_points = 16384  
 X\_prescans = 0  
 X\_resolution = 0.34397631 [Hz]  
 X\_sweep = 5.63570784 [kHz]  
 Irr\_domain = 1H  
 Irr\_freq = 300.52965592 [MHz]  
 Irr\_offset = 5 [ppm]  
 Tri\_domain = 1H  
 Tri\_freq = 300.52965592 [MHz]  
 Tri\_offset = 5 [ppm]  
 Clipped = FALSE  
 Mod\_return = 1  
 Scans = 8  
 Total\_scans = 8  
 X\_90\_width = 12.5 [us]  
 X\_acq\_time = 2.90717696 [s]  
 X\_angle = 45 [deg]  
 X\_atn = 6.4 [dB]  
 X\_pulse = 6.25 [us]  
 Irr\_mode = Off  
 Irr\_power = Off  
 Dante\_presat = FALSE  
 Initial\_wait = 1 [s]  
 Recvr\_gain = 32  
 Relaxation\_delay = 5 [s]  
 Repetition\_time = 7.90717696 [s]  
 Temp\_get = 24 [dC]

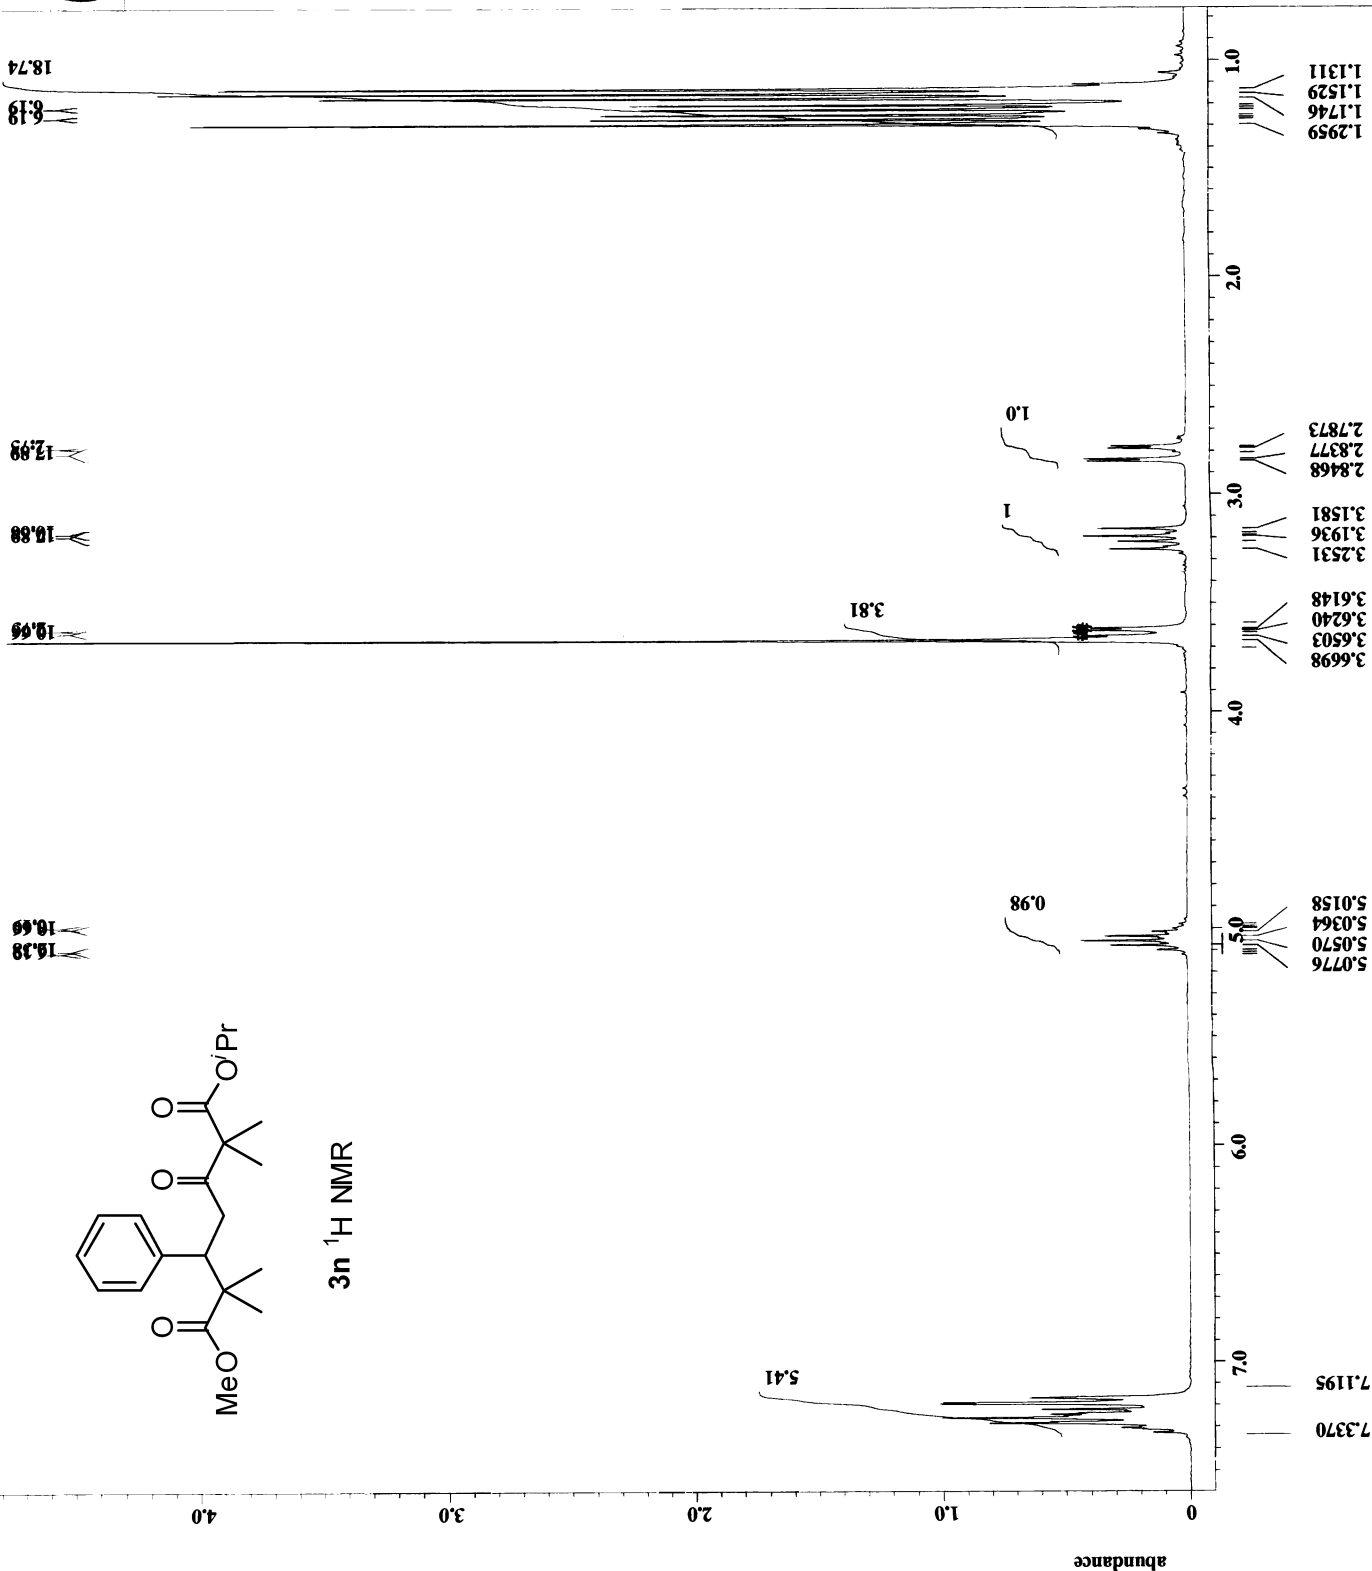

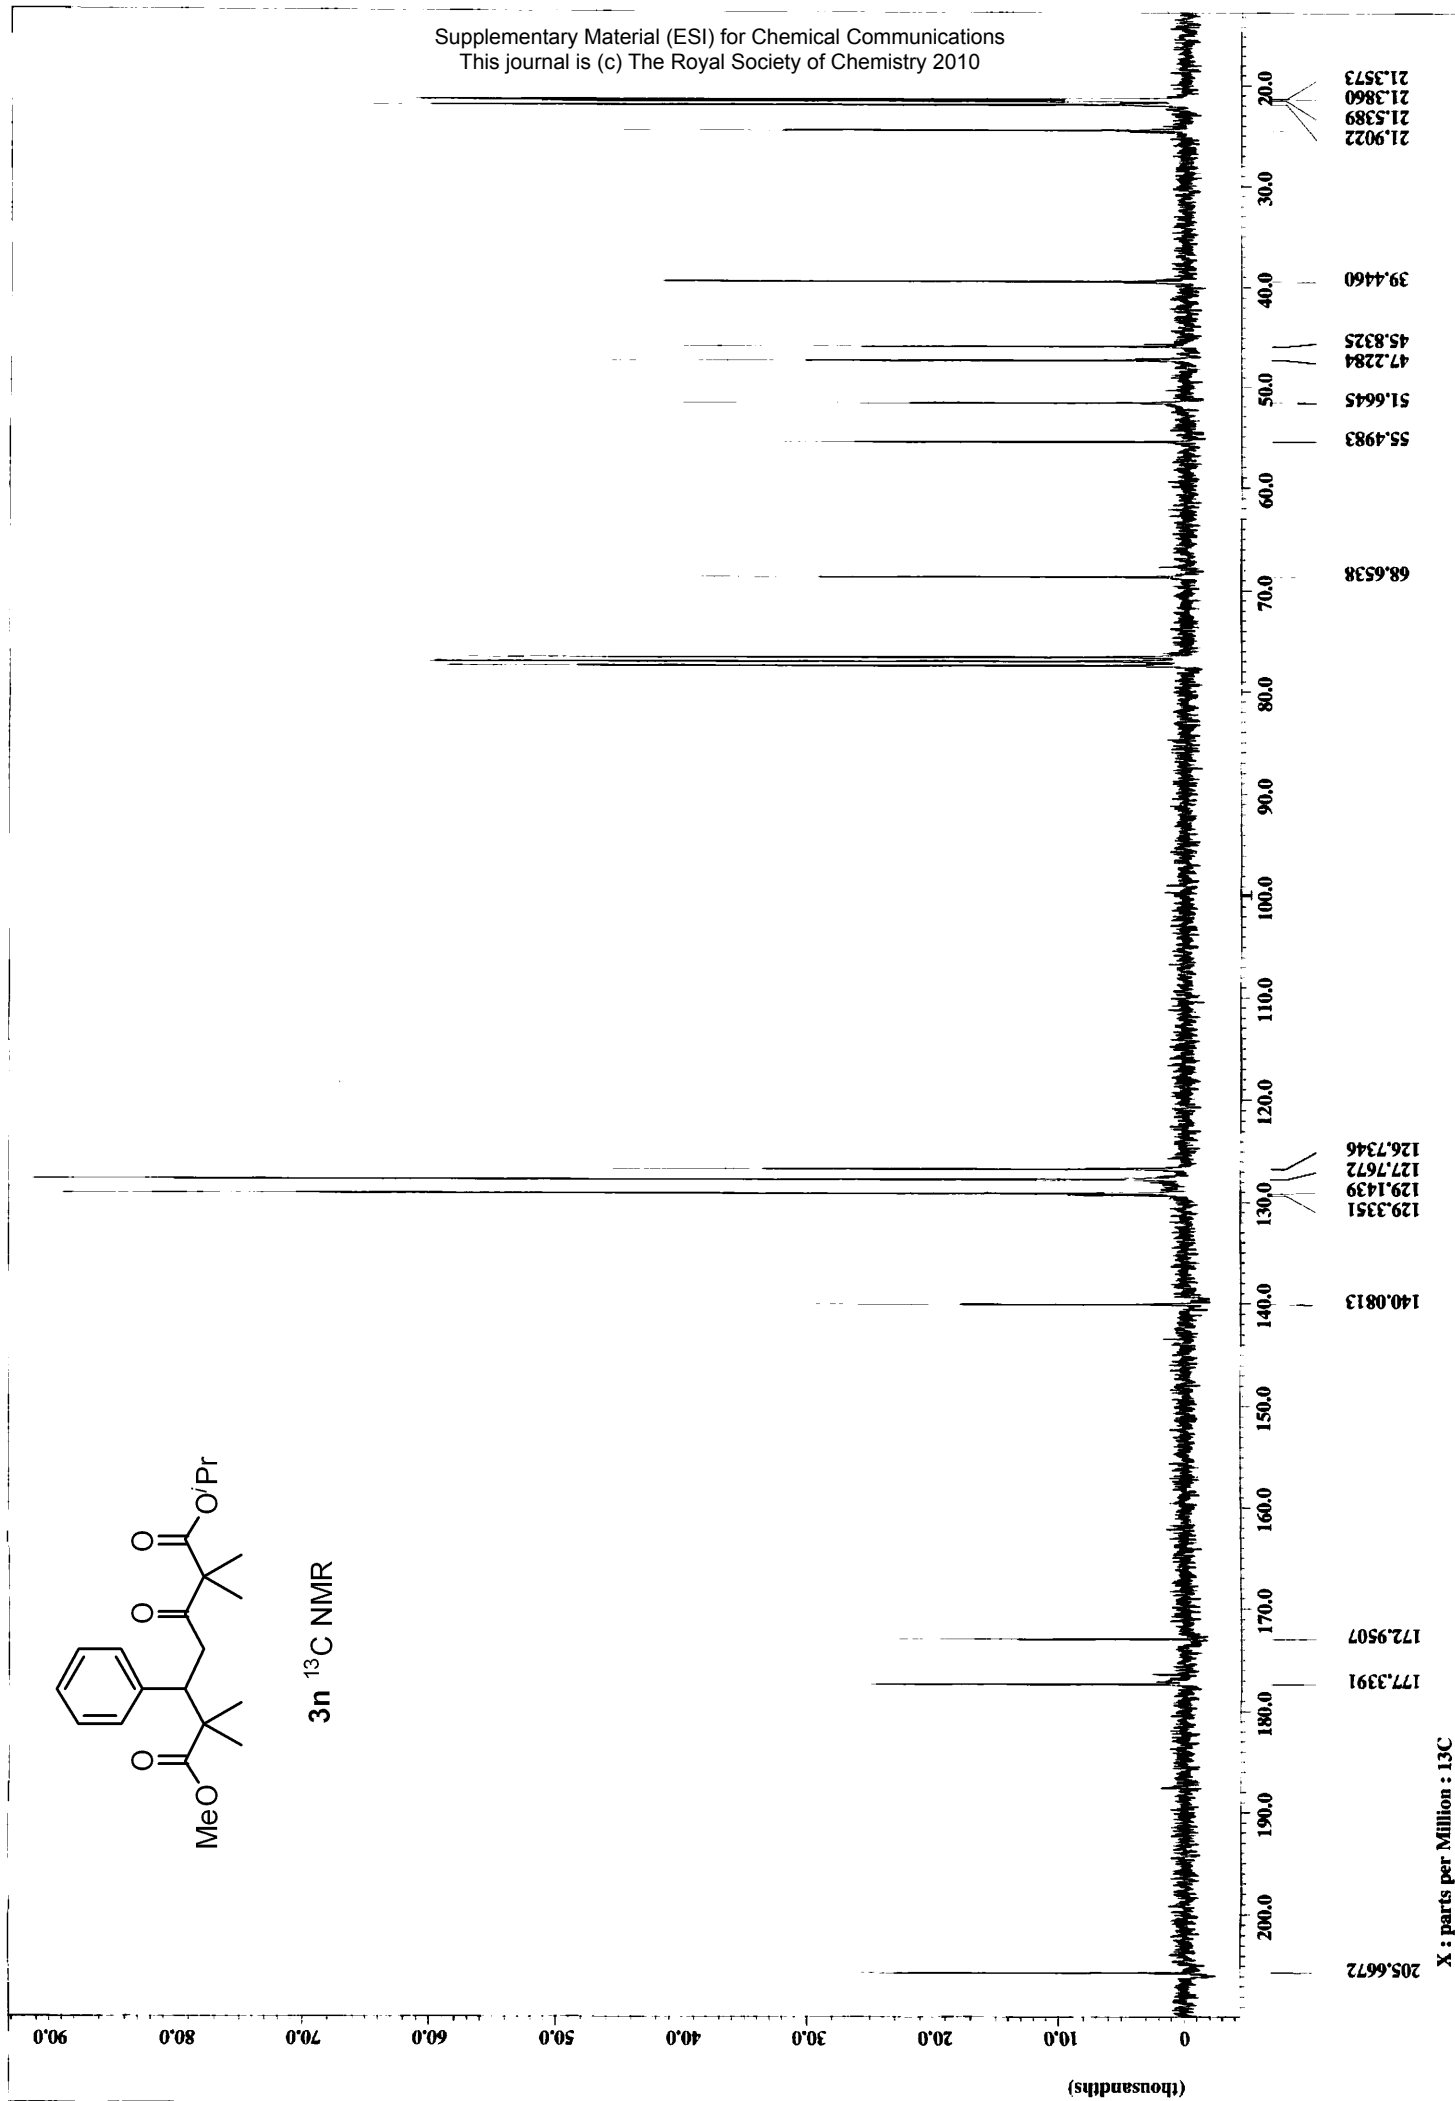

Filename = YN-379-1H-2.fdf  
 Author = delta  
 Experiment = single\_pulse.ex2  
 Sample\_id = YN-379-1H  
 Solvent = CHLOROFORM-D  
 Creation\_time = 16-MAR-2009 18:26:38  
 Revision\_time = 7-APR-2009 20:48:25  
 Current\_time = 7-APR-2009 20:48:47  
 Comment = single\_pulse  
 Data\_format = 1D\_REAL  
 Dim\_size = 13107  
 Dim\_title = 1H  
 Dim\_units = [ppm]  
 Dimensions = X  
 Site = ECA300 (2 JMT30-2)  
 Spectrometer = DELTA2\_NMR  
 Field\_strength = 7.0586013 [T] (300 [MHz]  
 X\_acq\_duration = 2.90717696 [s]  
 X\_domain = 1H  
 X\_freq = 300.52965592 [MHz]  
 X\_offset = 5 [ppm]  
 X\_points = 16384  
 X\_prescans = 0  
 X\_resolution = 0.34397631 [Hz]  
 X\_sweep = 5.63570784 [kHz]  
 Irr\_domain = 1H  
 Irr\_freq = 300.52965592 [MHz]  
 Irr\_offset = 5 [ppm]  
 Tri\_domain = 1H  
 Tri\_freq = 300.52965592 [MHz]  
 Tri\_offset = 5 [ppm]  
 Clipped = FALSE  
 Mod\_return = 1  
 Scans = 8  
 Total\_scans = 8  
 X\_90\_width = 11.4 [us]  
 X\_acq\_time = 2.90717696 [s]  
 X\_angle = 45 [deg]  
 X\_atn = 6.4 [dB]  
 X\_pulse = 5.7 [us]  
 Irr\_mode = Off  
 Tri\_mode = Off  
 Dantec\_preset = FALSE  
 Initial\_wait = 1 [s]  
 Recvr\_gain = 38  
 Relaxation\_delay = 5 [s]  
 Repetition\_time = 7.90717696 [s]  
 Temp\_get = 25.1 [DC]

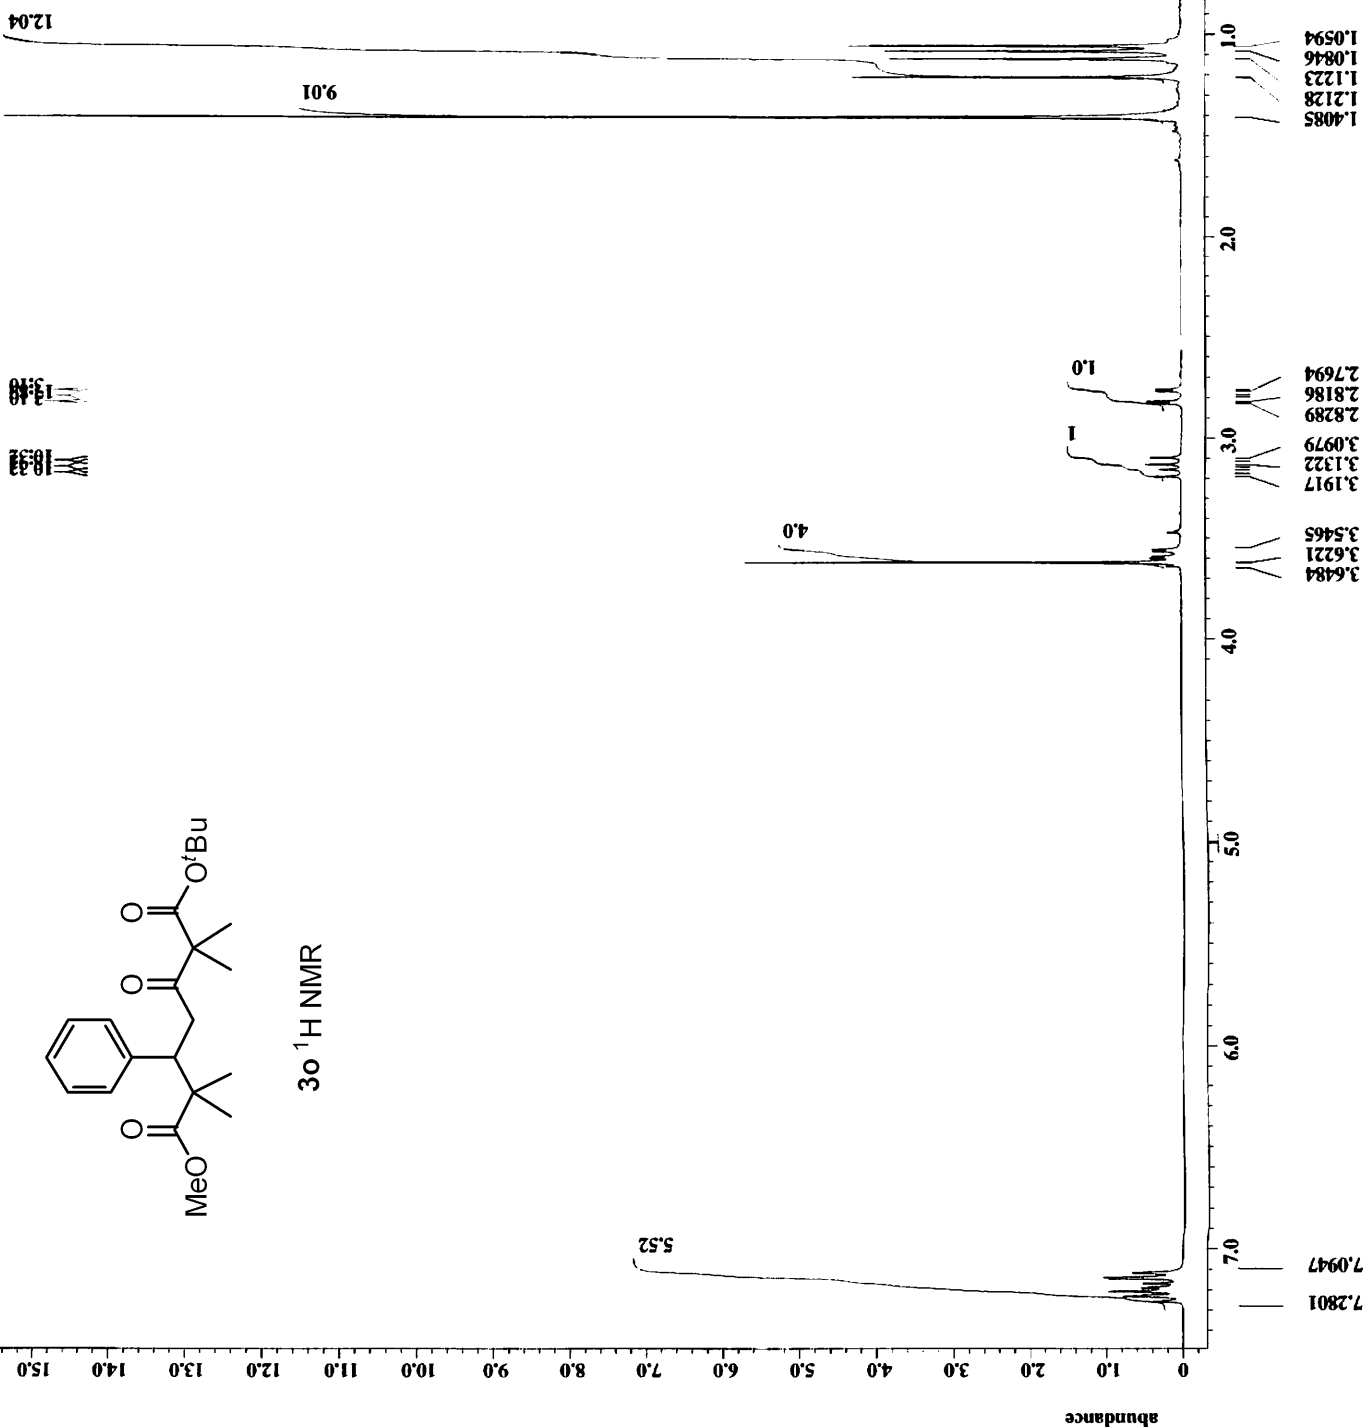

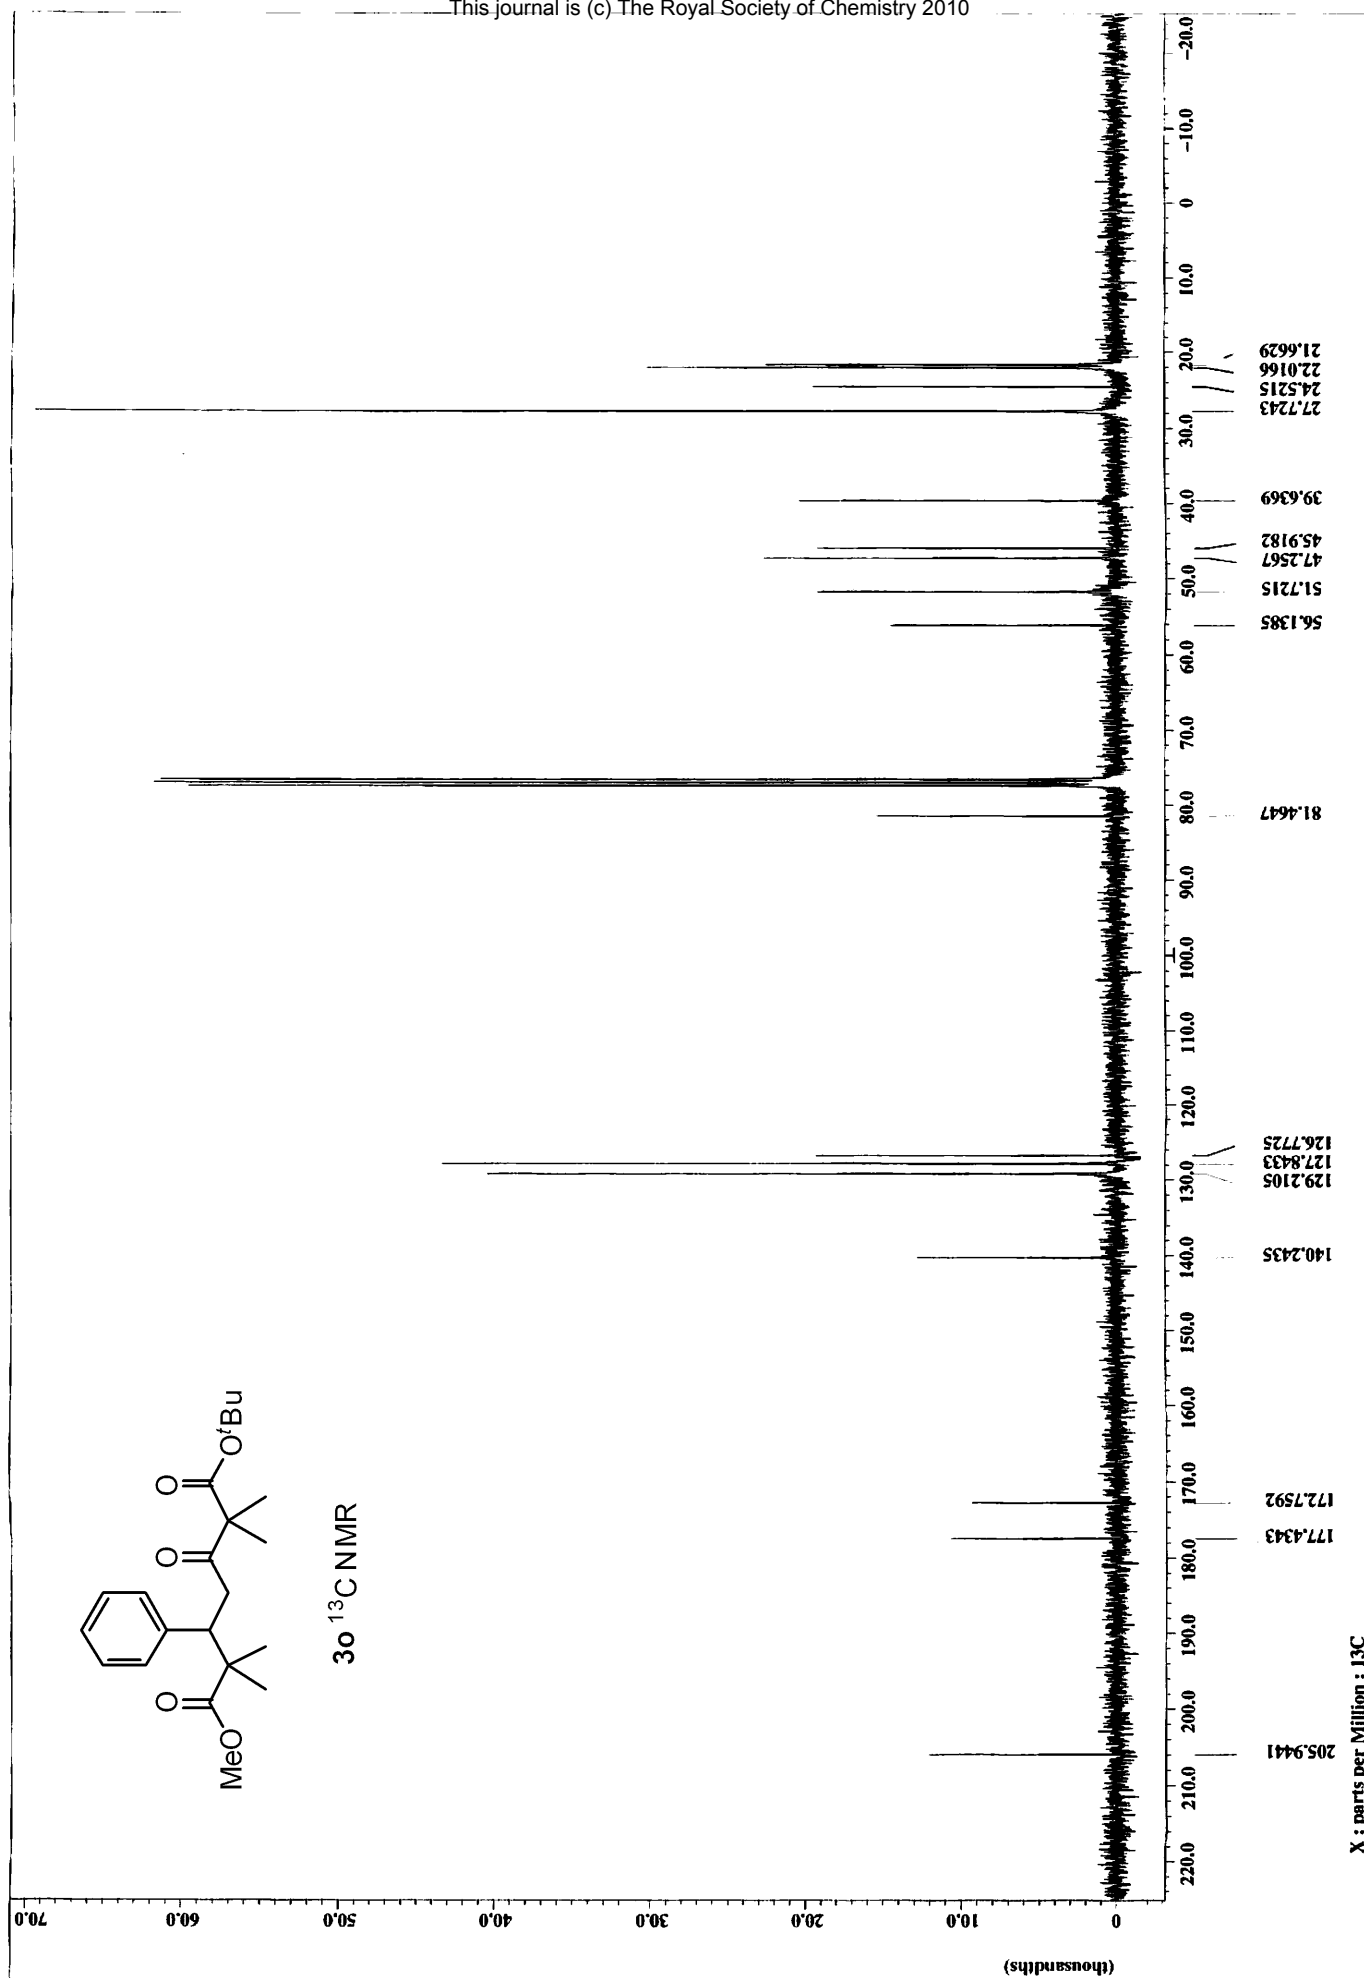



```

Filename      = YN-340-1H-6-Jdf
Author        = delta
Experiment     = single_pulse.ex2
Sample_id     = YN-340-1H
Solvent       = CHLOROFORM-D
Creation_time  = 16-MAR-2009 17:30:12
Revision_time  = 6-MAY-2009 19:42:04
Current_time   = 6-MAY-2009 19:42:27

=====

Comment       = single_pulse
Data_format   = 1D REAL
Dim_size      = 13107
Dim_title     = 1H
Dim_units     = [ppm]
Dimensions    = x
Site          = ECA300 (2 JMT30-2)
Spectrometer  = DELTA2_NMR

=====

Field_strength = 7.0586013[T] (300[MHz]
X_acq_duration = 2.90717696[s]
X_domain       = 1H
X_freq         = 300.52965592[MHz]
X_offset       = 5[ppm]
X_points       = 16384
X_prescans     = 0
X_resolution   = 0.34397631[Hz]
X_sweep        = 5.63570784[kHz]
Irr_domain     = 1H
Irr_freq       = 300.52965592[MHz]
Irr_offset     = 5[ppm]
Tri_domain     = 1H
Tri_freq       = 300.52965592[MHz]
Tri_offset     = 5[ppm]
Clipped        = FALSE
Mod_return     = 1
Scans          = 8
Total_scans    = 8

=====

X_90_width     = 11.4[us]
X_acq_time      = 2.90717696[s]
X_angle         = 45[deg]
X_atn           = 6.4[dB]
X_pulse         = 5.7[us]
Irr_mode        = Off
Tri_mode        = Off
Dante_presat    = FALSE
Initial_wait    = 1[s]
Recvr_gain      = 44
Relaxation_delay = 5[s]
Repetition_time = 7.90717696[s]
Temp_set        = 25[dc]

```

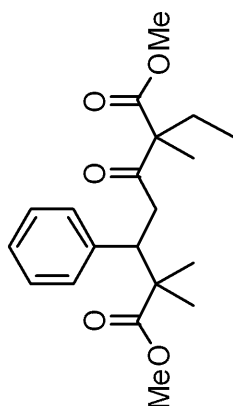

3p  $^1\text{H}$  NMR

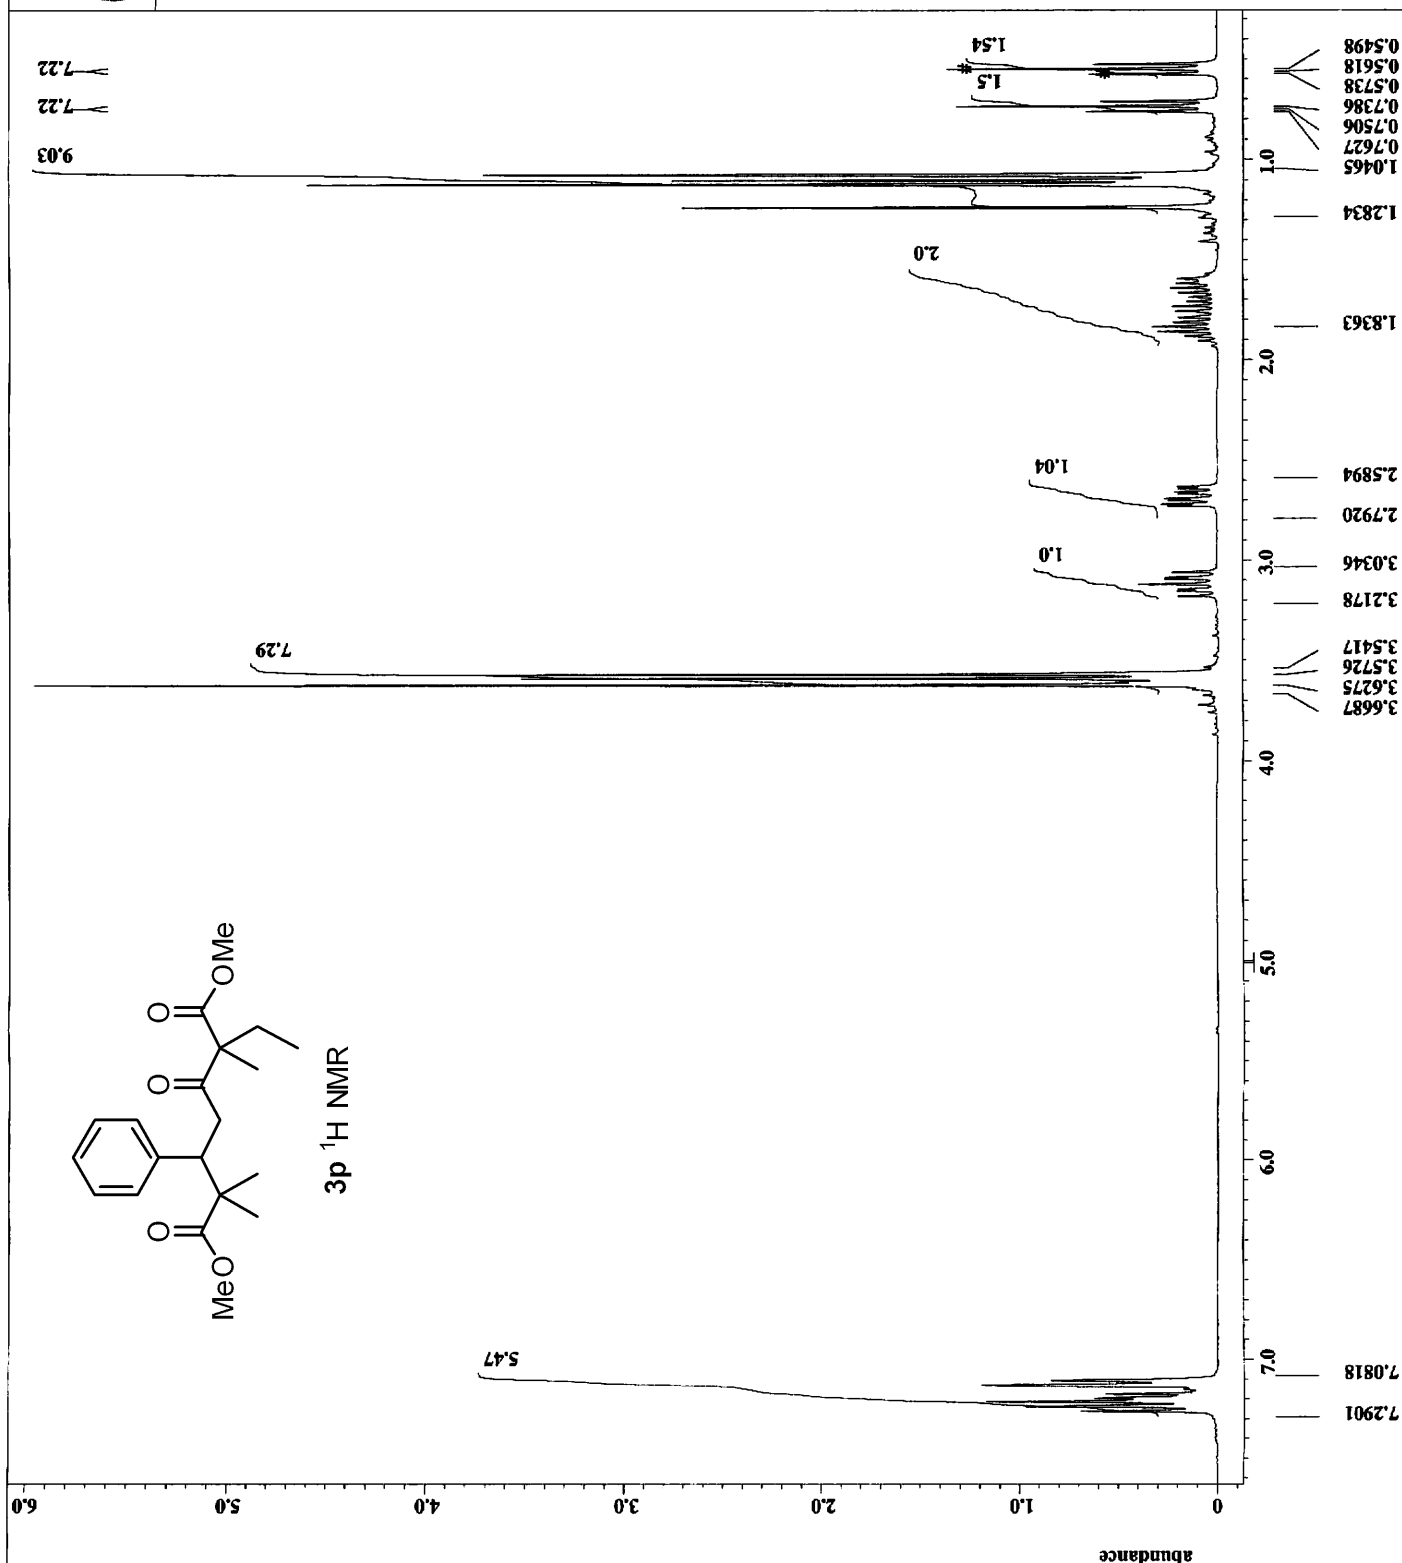

X : parts per Million : 1H

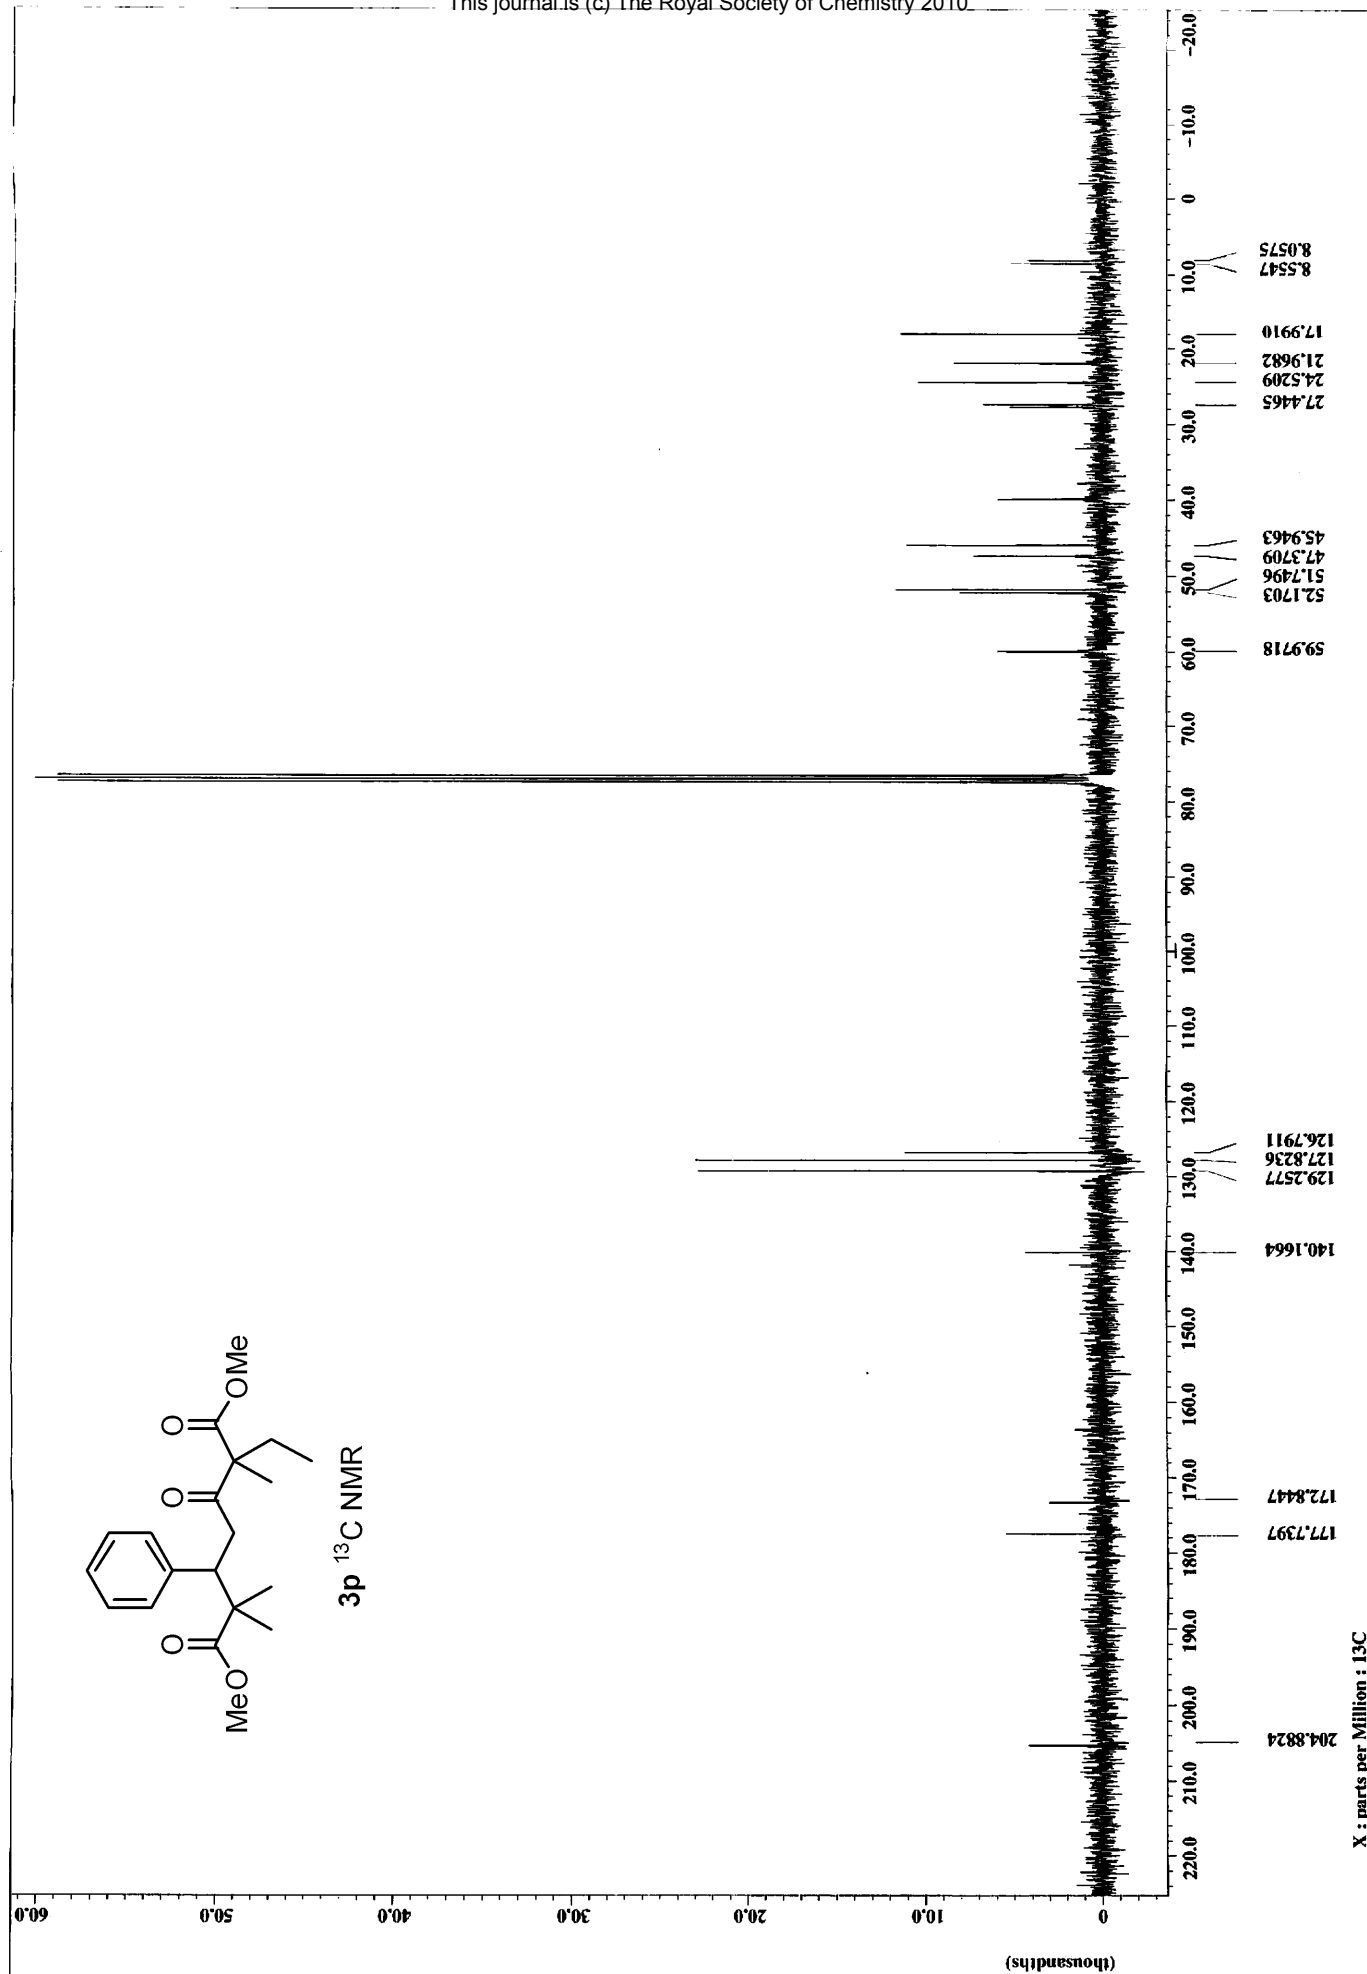

Filename = HT-548-1H-5.jdf  
 Author = delta  
 Experiment = single\_pulse.ex2  
 Sample\_id = HT-548-CLM  
 Solvent = CHLOROFORM-D  
 Creation\_time = 28-MAY-2009 21:59:19  
 Revision\_time = 26-AUG-2009 11:04:07  
 Current\_time = 26-AUG-2009 11:04:37  
 Comment = single\_pulse  
 Data\_format = 1D COMPLEX  
 Dim\_size = 13107  
 Dim\_title = 1H  
 Dim\_units = [ppm]  
 Dimensions = X  
 Site = ECA300 (2 JMT30-2)  
 Spectrometer = DELTA2\_NMR  
 Field\_strength = 7.0586013[T] (300 [MHz]  
 X\_acq\_duration = 2.90717696[s]  
 X\_domain = 1H  
 X\_freq = 300.52965592 [MHz]  
 X\_offset = 5 [ppm]  
 X\_points = 16384  
 X\_prescans = 0  
 X\_resolution = 0.34397631 [Hz]  
 X\_sweep = 5.63570784 [KHz]  
 Irr\_domain = 1H  
 Irr\_freq = 300.52965592 [MHz]  
 Irr\_offset = 5 [ppm]  
 Tri\_domain = 1H  
 Tri\_freq = 300.52965592 [MHz]  
 Tri\_offset = 5 [ppm]  
 Clipped = FALSE  
 Mod\_return = 1  
 Scans = 8  
 Total\_scans = 8  
 X\_90\_width = 11.4 [us]  
 X\_acq\_time = 2.90717696 [s]  
 X\_angle = 45 [deg]  
 X\_atn = 6.4 [dB]  
 X\_pulse = 5.7 [us]  
 Irr\_mode = Off  
 Irr\_off = Off  
 Danta\_presat = FALSE  
 Initial\_wait = 1 [s]  
 Recvr\_gain = 42  
 Relaxation\_delay = 5 [s]  
 Repetition\_time = 7.90717696 [s]  
 Temp\_get = 26.1 [dc]

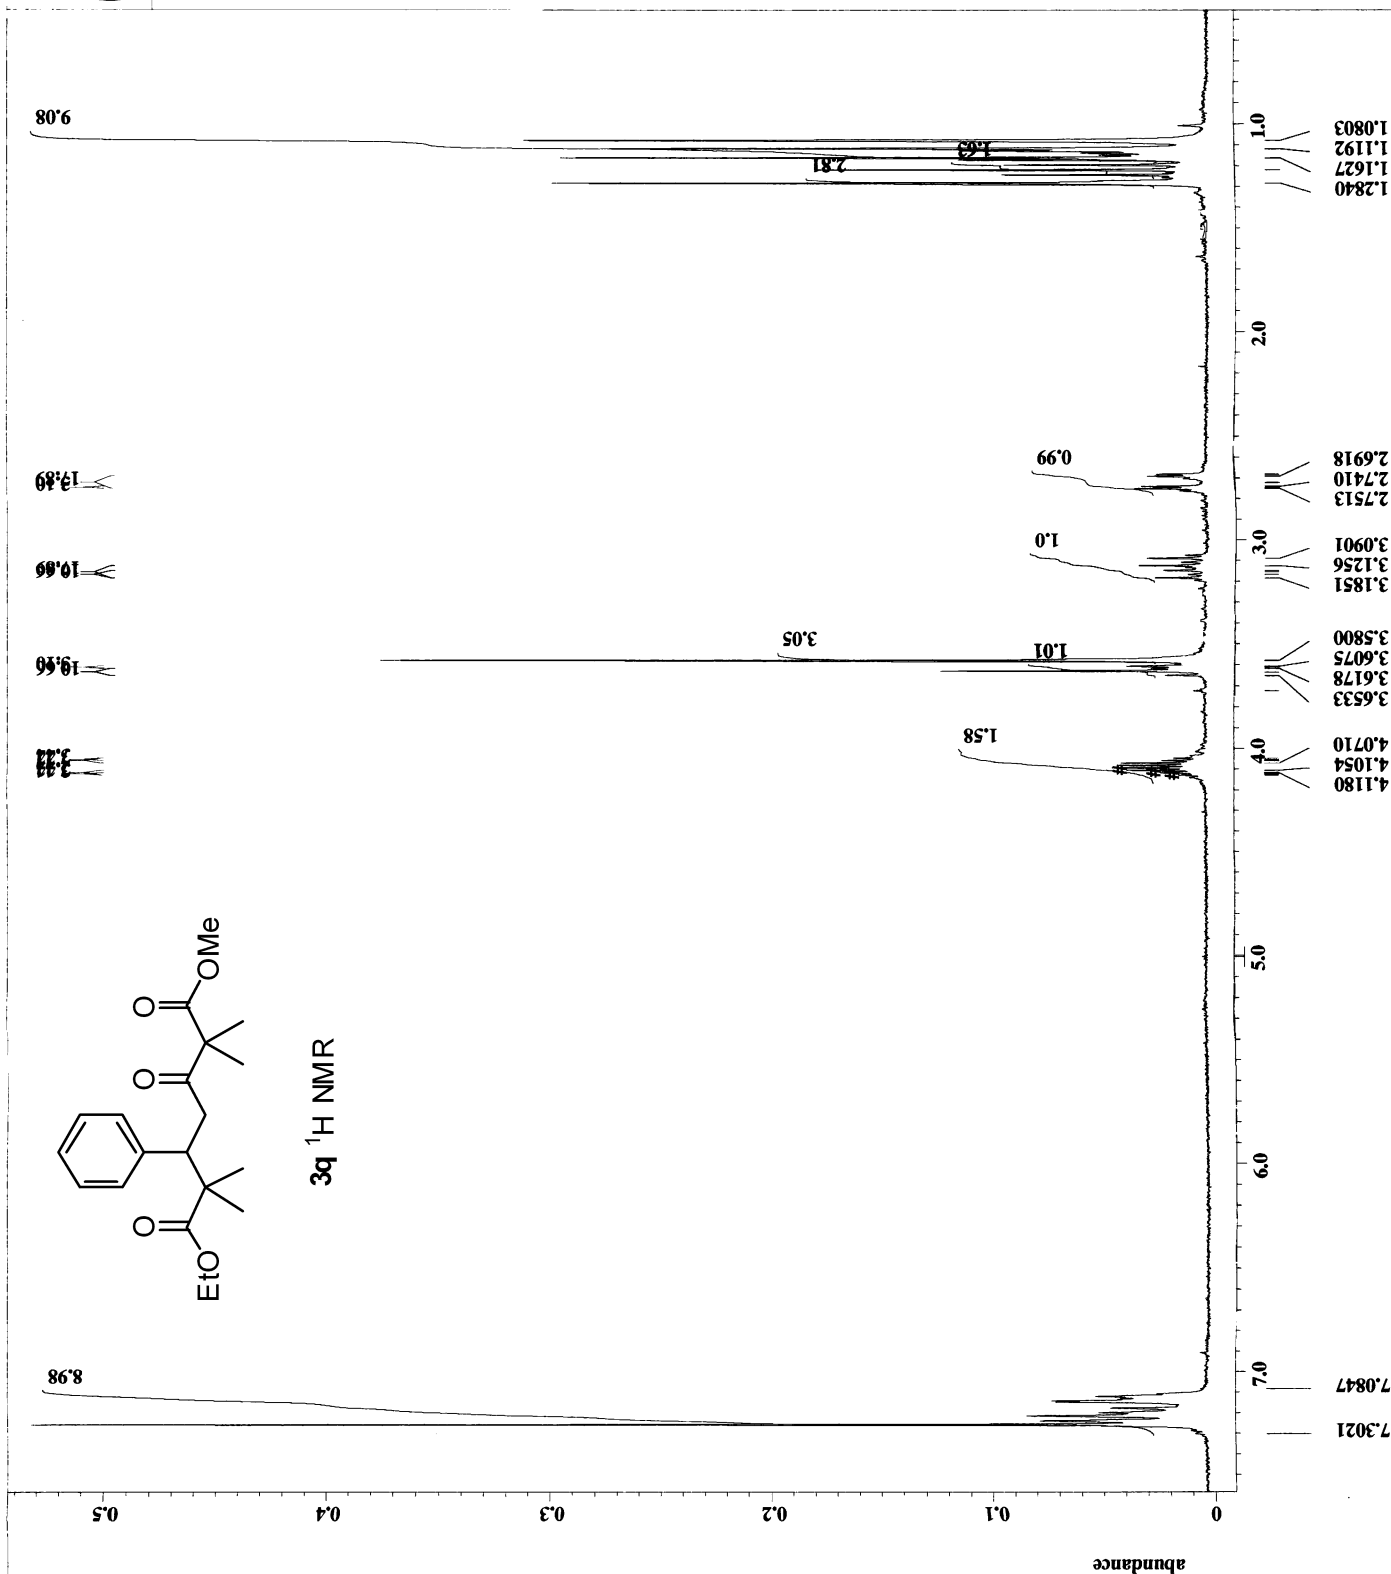

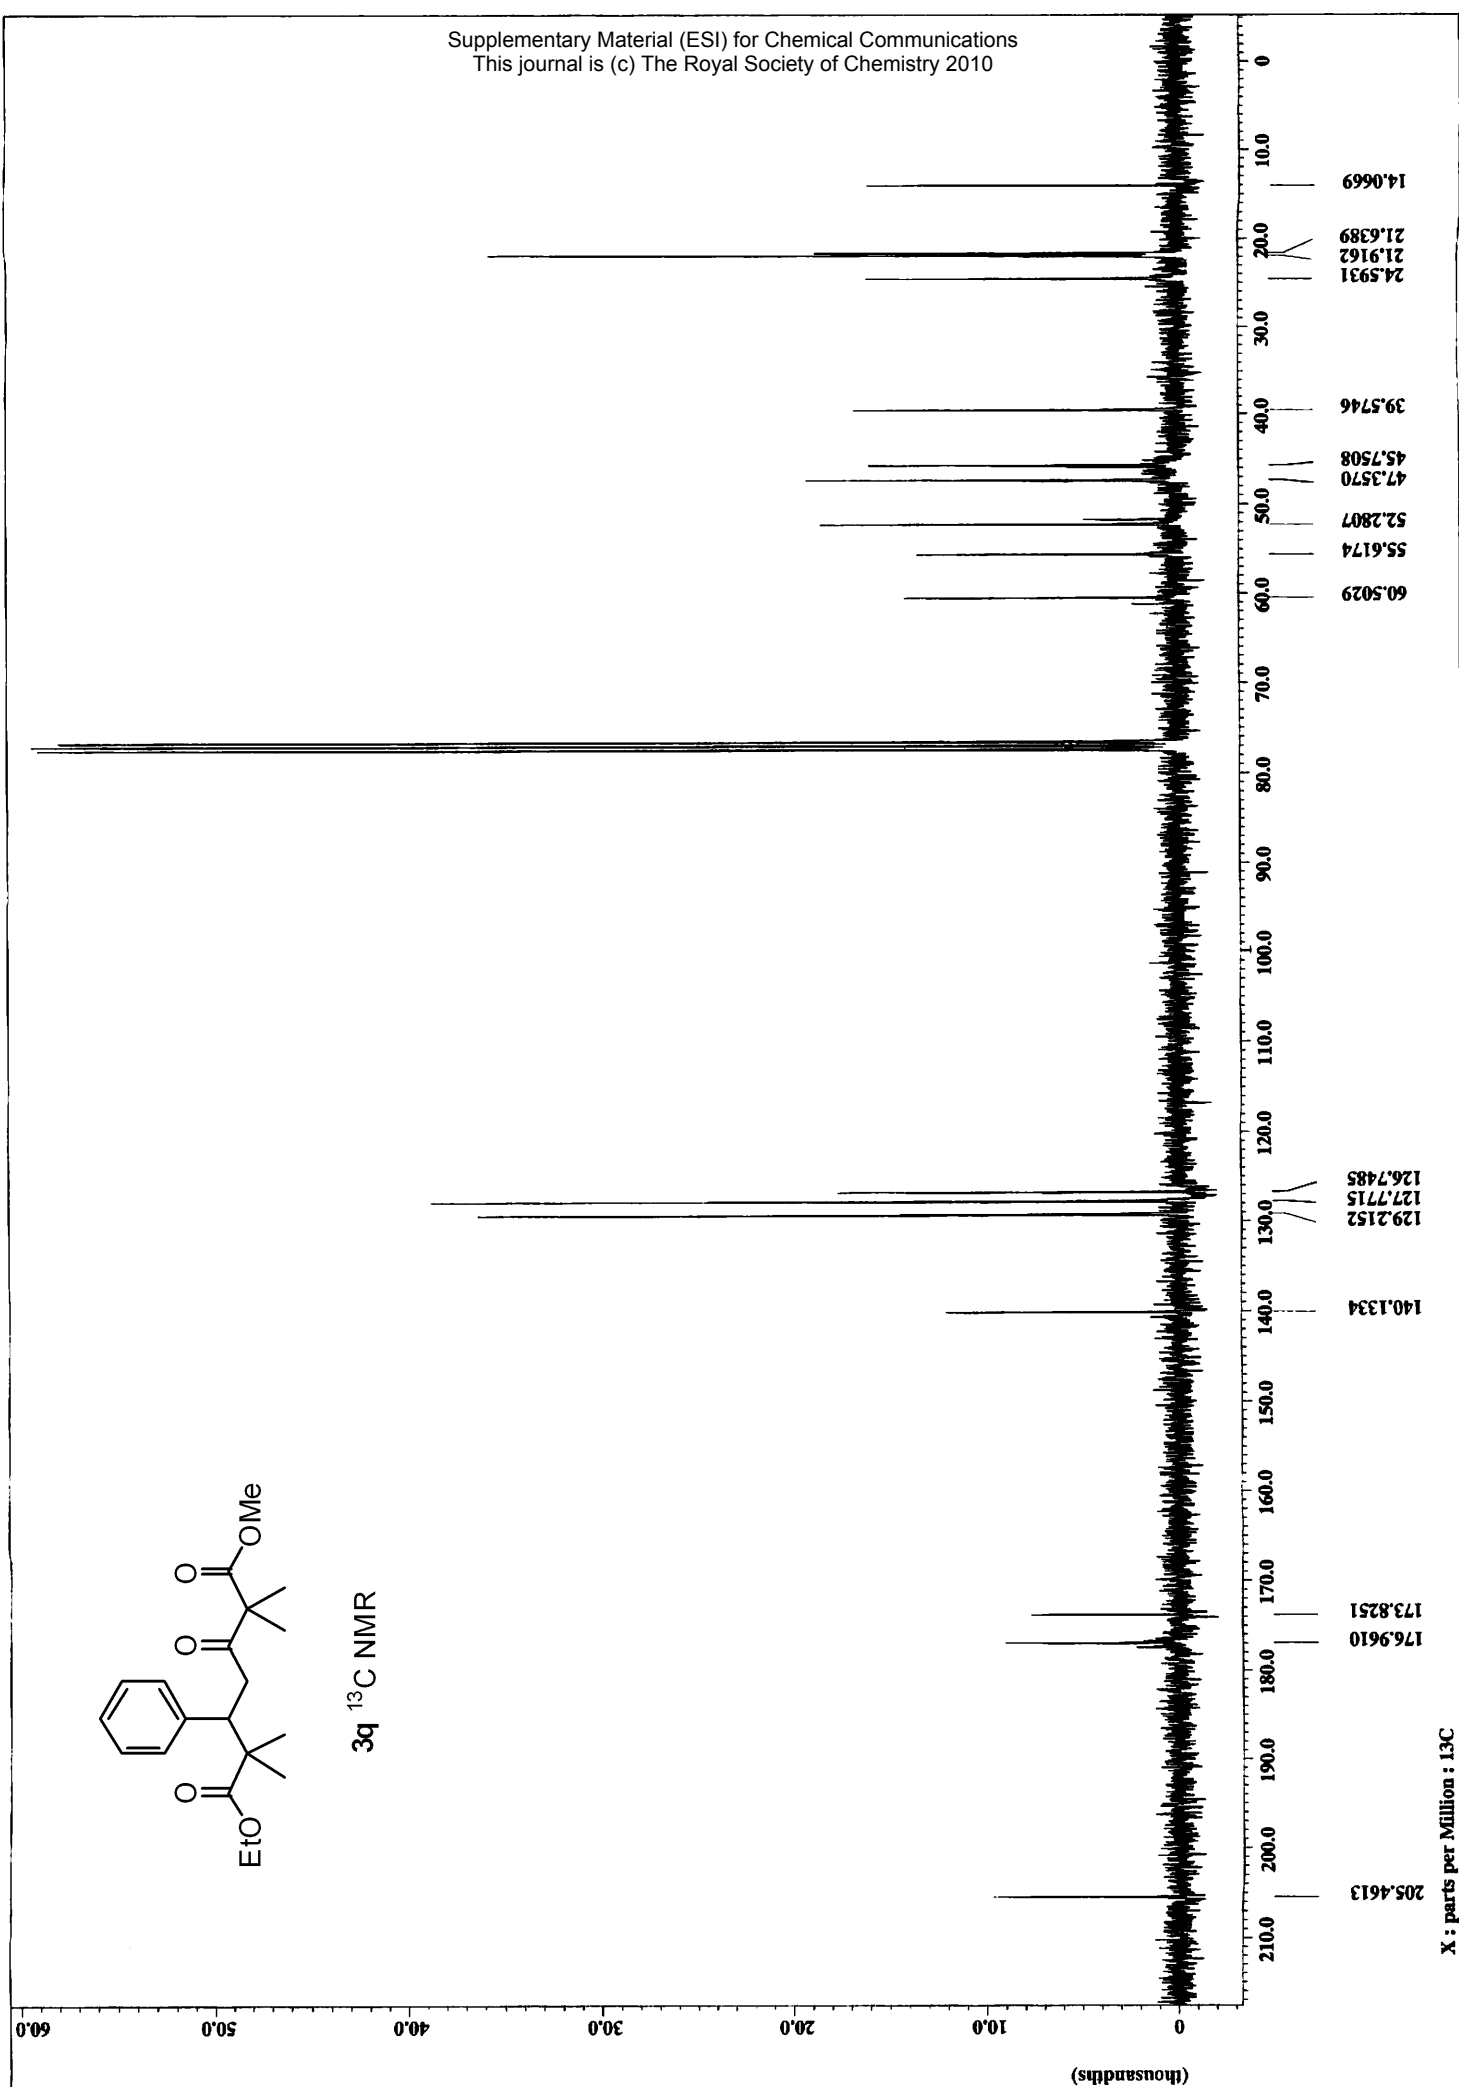

Filename = HT-557-1H-3.fdf  
 Author = delta  
 Experiment = single\_pulse.ex2  
 Sample\_id = HT-557-CTM  
 Solvent = CHLOROFORM-D  
 Creation\_time = 3-JUN-2009 20:26:50  
 Revision\_time = 3-JUN-2009 21:15:33  
 Current\_time = 3-JUN-2009 21:16:00  
 Comment = single\_pulse  
 Data\_format = 1D REAL  
 Dim\_size = 13107  
 Dim\_title = 1H  
 Dim\_units = [ppm]  
 Dimensions = x  
 Site = ECA300 (2 JMT30-2)  
 Spectrometer = DELTA2\_NMR  
 Field\_strength = 7.0586013[T] (300[MHz]  
 X\_acq\_duration = 2.90717696[s]  
 X\_domain = 1H  
 X\_freq = 300.52965592[MHz]  
 X\_offset = 5[ppm]  
 X\_points = 16384  
 X\_prescans = 0  
 X\_resolution = 0.34397631[Hz]  
 X\_sweep = 5.63570784[MHz]  
 Irr\_domain = 1H  
 Irr\_freq = 300.52965592[MHz]  
 Irr\_offset = 5[ppm]  
 Tri\_domain = 1H  
 Tri\_freq = 300.52965592[MHz]  
 Tri\_offset = 5[ppm]  
 Clipped = FALSE  
 Mod\_return = 1  
 Scans = 8  
 Total\_scans = 8  
 X\_90\_width = 11.4[us]  
 X\_acq\_time = 2.90717696[s]  
 X\_angle = 45[deg]  
 X\_atn = 6.4[db]  
 X\_pulse = 5.7[us]  
 Irr\_mode = Off  
 Tri\_mode = Off  
 Dante\_preset = FALSE  
 Initial\_wait = 1[s]  
 Recvr\_gain = 42  
 Relaxation\_delay = 5[s]  
 Repetition\_time = 7.90717696[s]  
 Temp\_get = 25.6[degC]

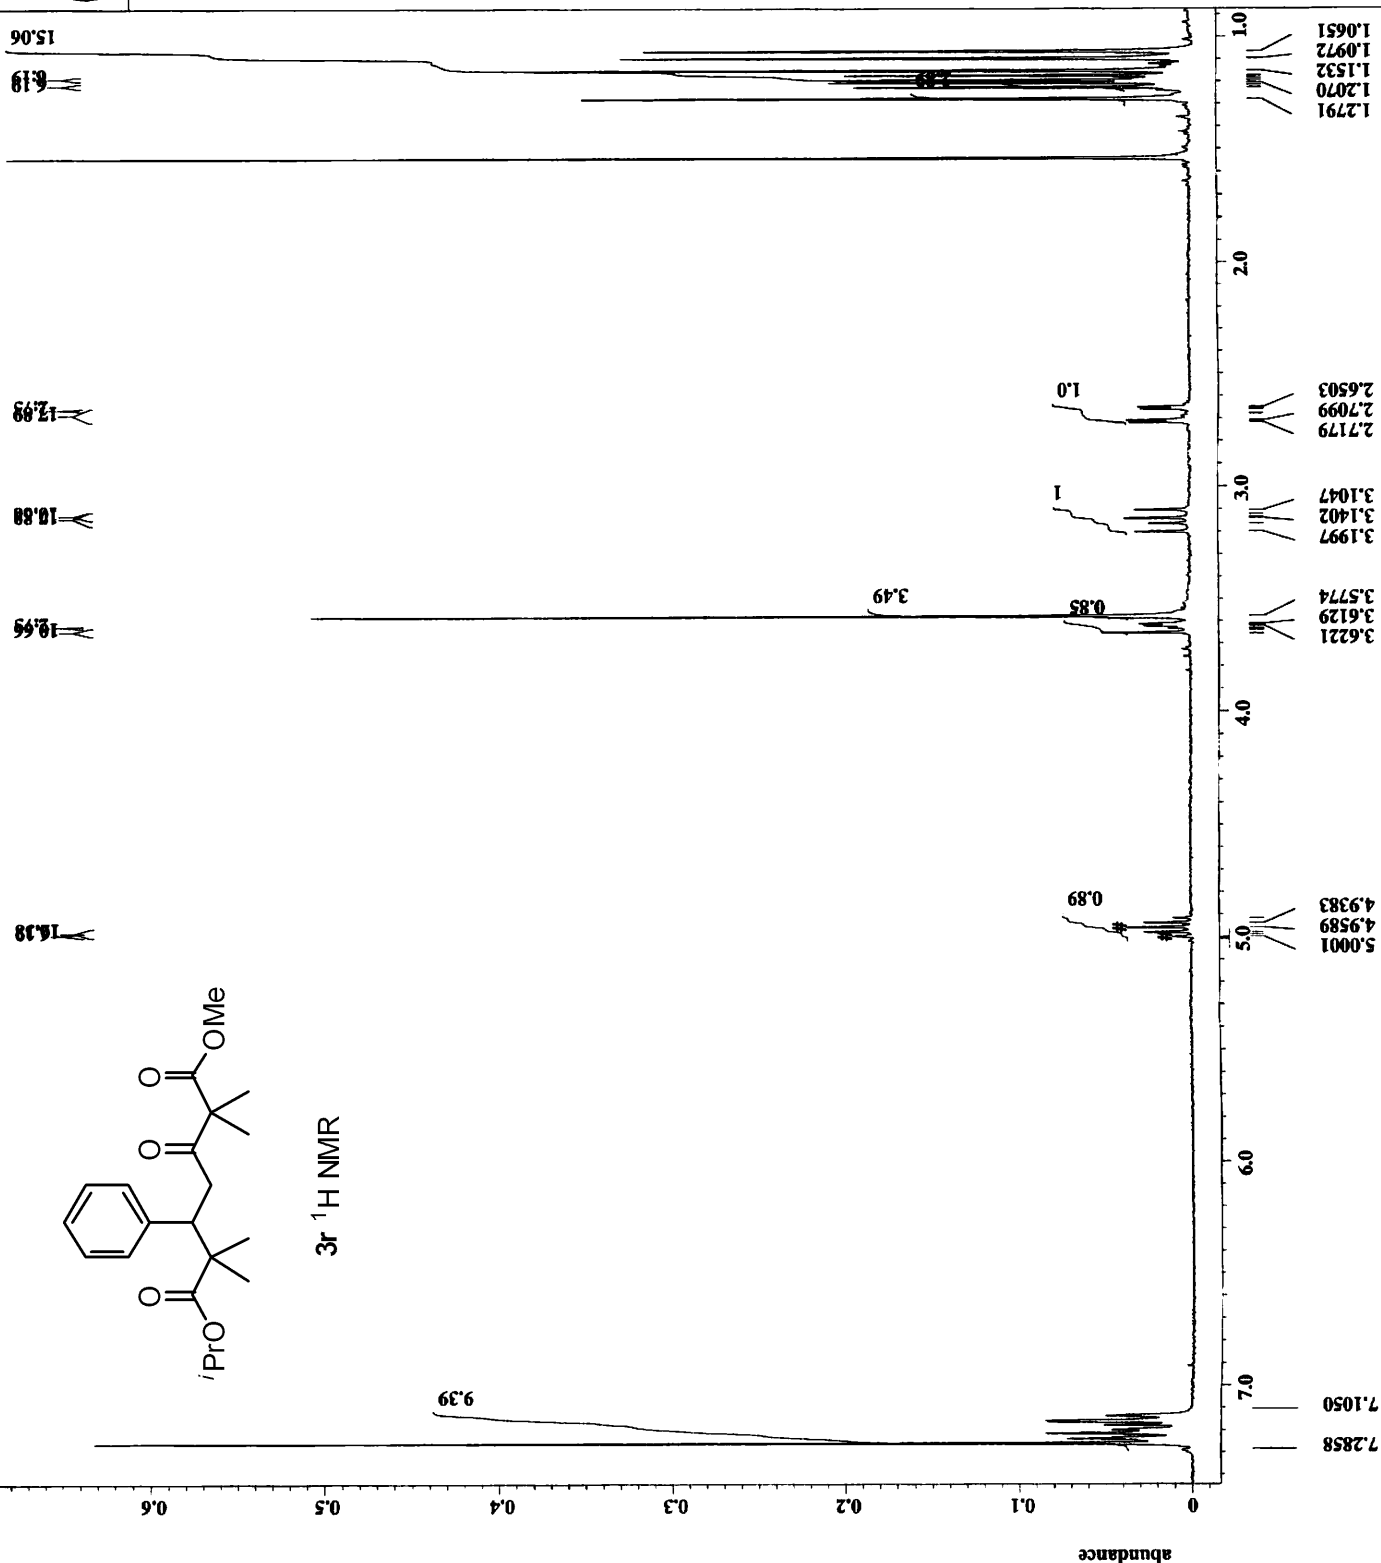

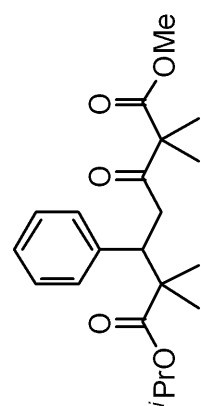

3r <sup>13</sup>C NMR

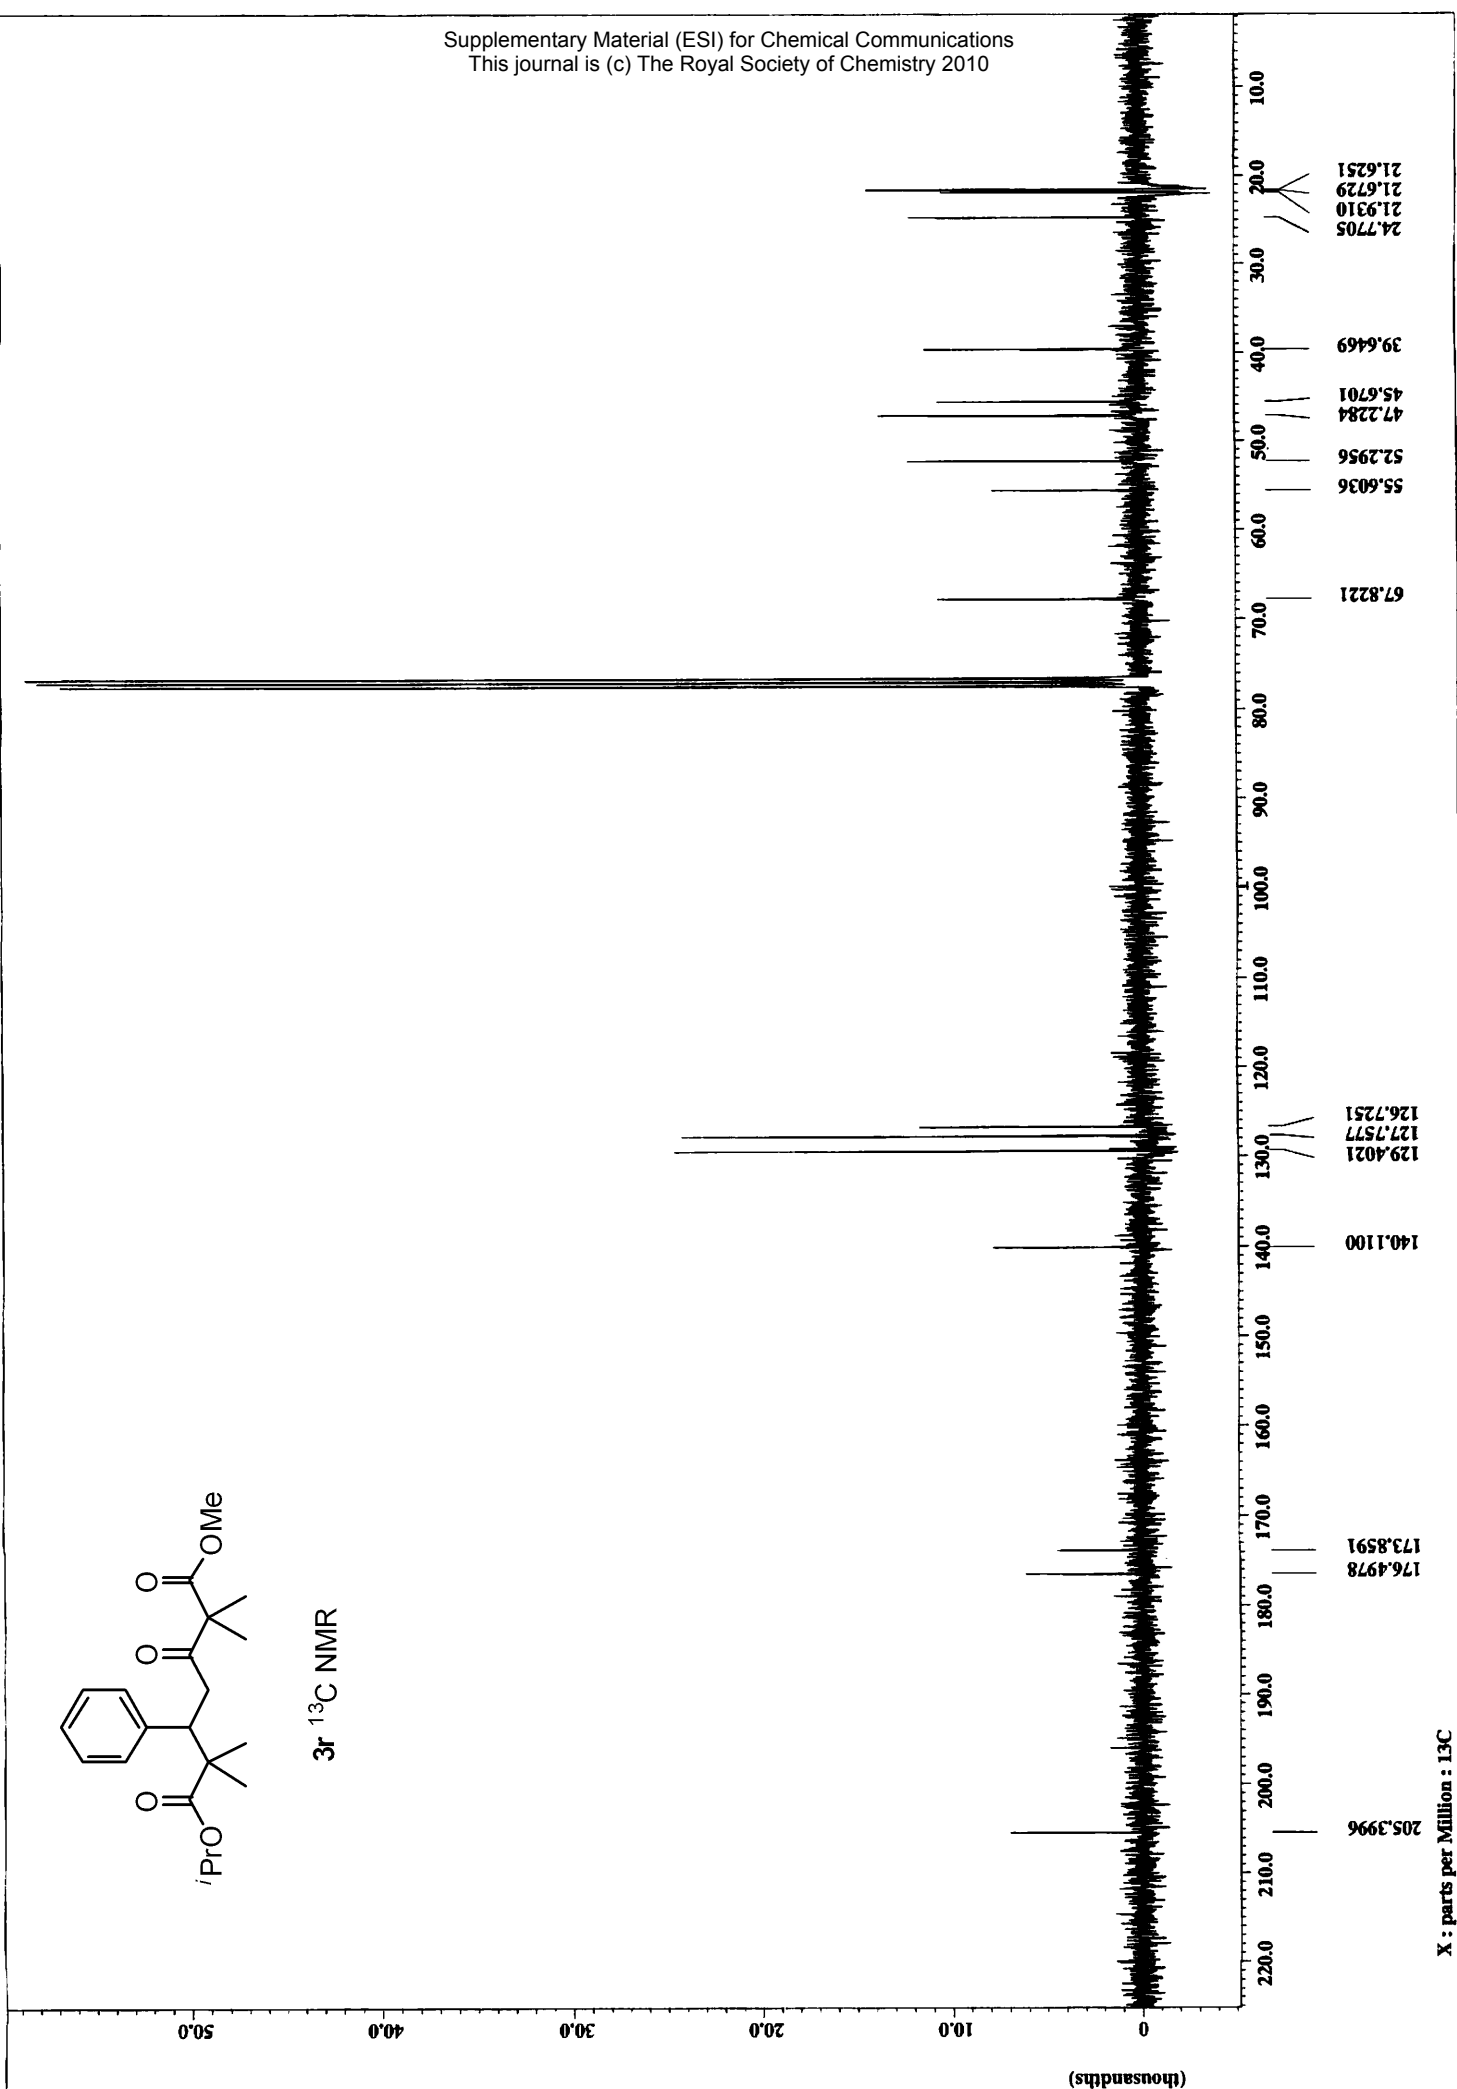

```

= HT-540-1H-7.dcf
= delta
= single_pulse.ex2
= HT-540-CLM
= CELOROPORH-D
= 25-MAY-2009 11:07:43
= 13-JUN-2009 12:59:11
= 13-JUN-2009 12:59:22

= single_pulse
= 1D REAL
= 13107
= 1H
= [ppm]
= X
= ECA300 (2 JMW30-2)
= DELTA2_NMR

= Field_strength
= 7.0586013[T] (300[MHz]
= 2.90717696[s]
= 1H
= 300.52965592[MHz]
= 5[ppm]
= 16384
= 0
= 0.34397631[Hz]
= 5.63570784[MHz]
= 1H
= 300.52965592[MHz]
= 5[ppm]
= 1H
= 300.52965592[MHz]
= 5[ppm]
= FALSE
= 1
= 8
= 8

= X_90_width
= 11.4[us]
= 2.90717696[s]
= 45[deg]
= 6.4[dB]
= 5.7[us]
= Off
= Off
= FALSE
= 1[s]
= 42
= 5[s]
= 2.90717696[s]
= 26[QC]
= Temp_get

```

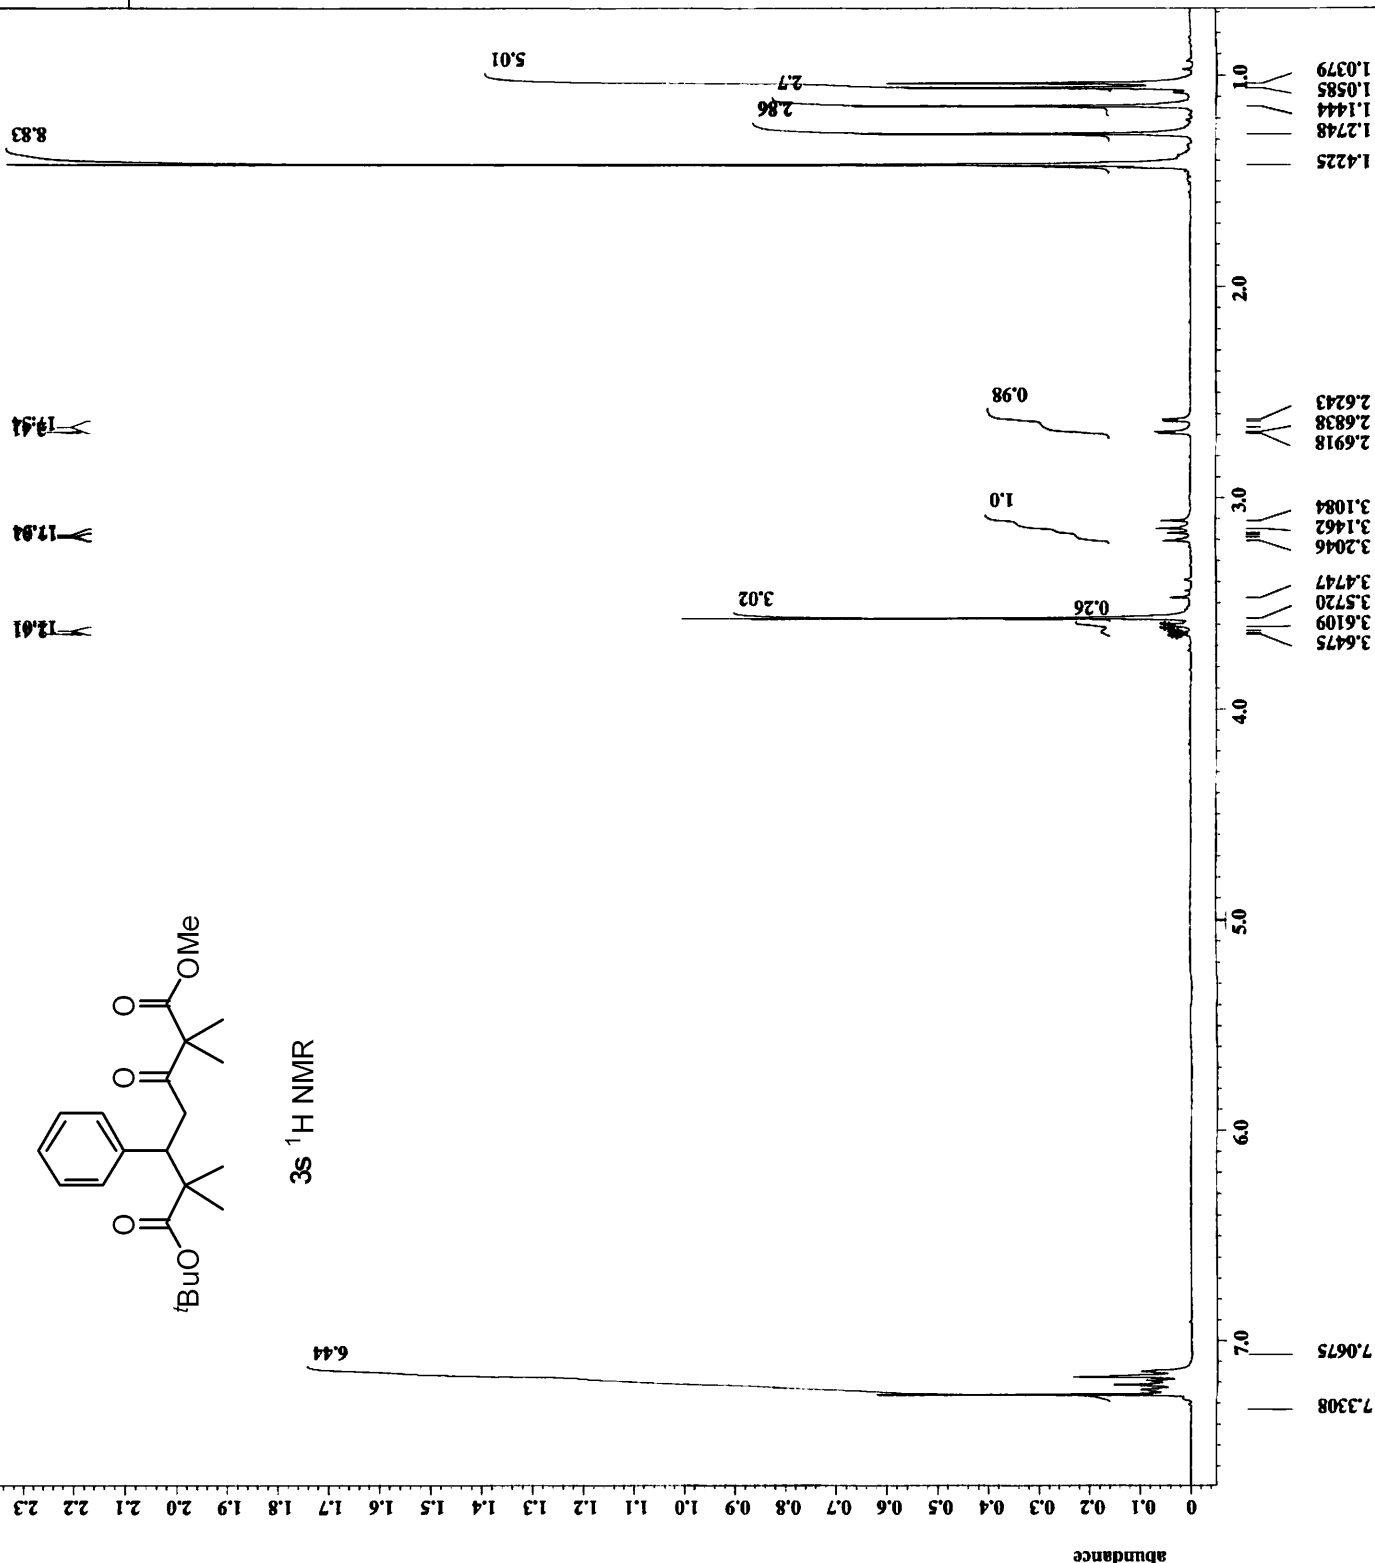

**X : parts per Million : 1H**

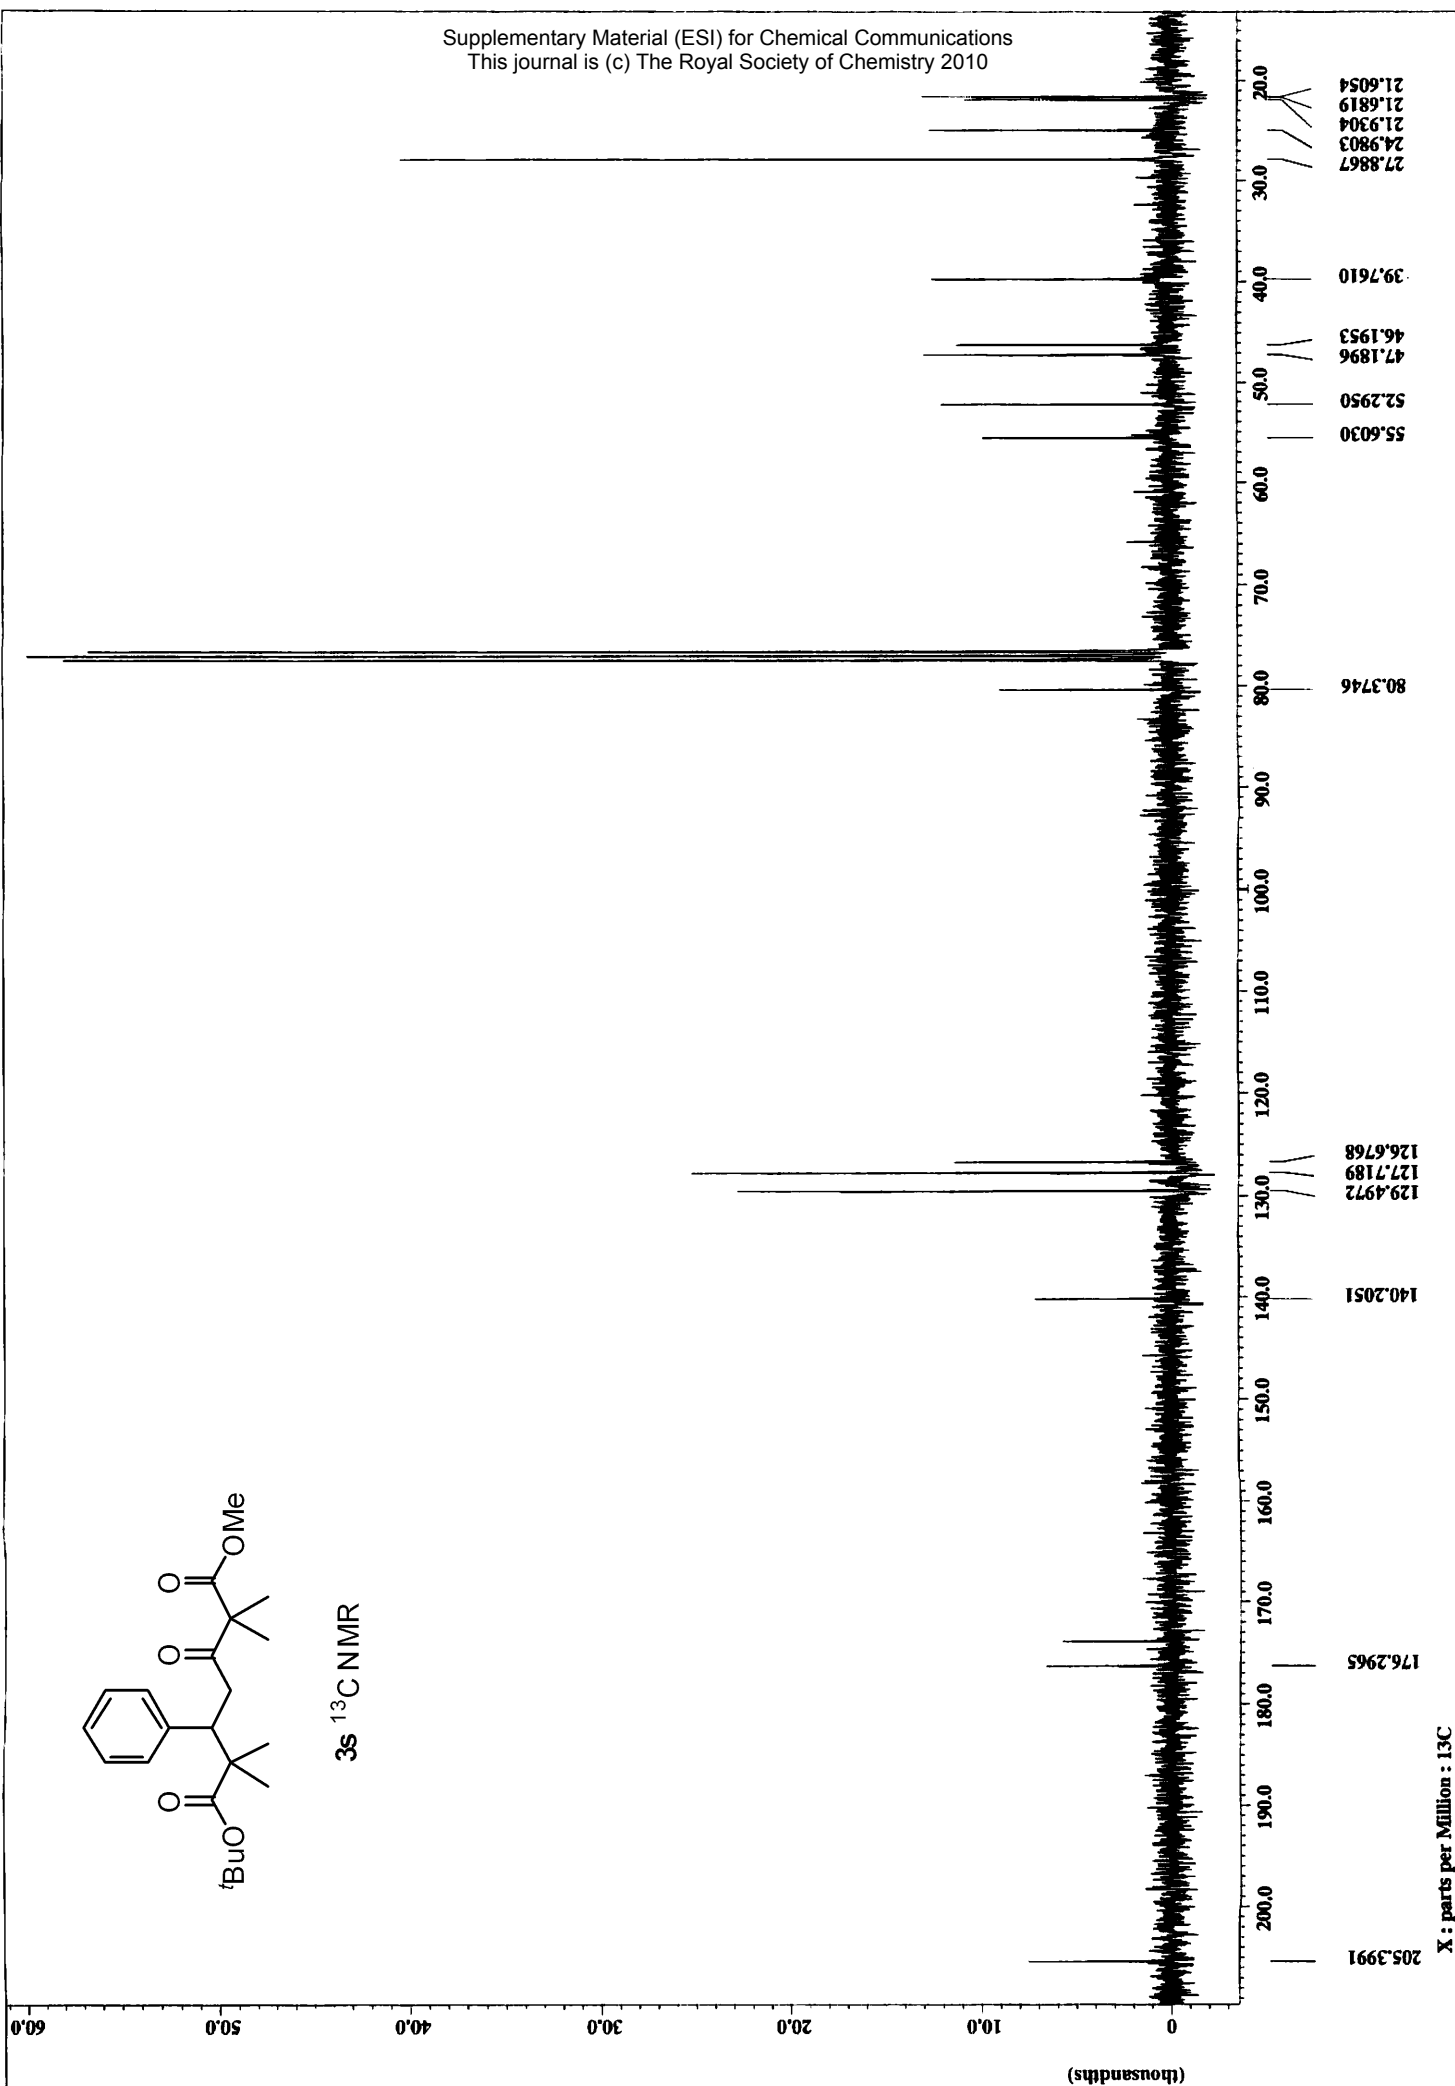



Filename = HT-623-1H-3.jdf  
 Author = delta  
 Experiment = single\_pulse.ex2  
 Sample\_id = HT-623-CLM  
 Solvent = CHLOROFORM-D  
 Creation\_time = 14-AUG-2009 18:45:41  
 Revision\_time = 14-AUG-2009 19:20:41  
 Current\_time = 14-AUG-2009 19:21:12  
 Comment = single\_pulse  
 Data\_format = 1D REAL  
 Dim\_size = 13107  
 Dim\_title = 1H  
 Dim\_units = [ppm]  
 Dimensions = X  
 Site = ECA300 (2 JMT30-2)  
 Spectrometer = DELTA2\_NMR  
 Field\_strength = 7.0586013[T] (300 [MHz]  
 X\_acq\_duration = 2.90717696[s]  
 X\_domain = 1H  
 X\_freq = 300.52965592 [MHz]  
 X\_offset = 5 [ppm]  
 X\_points = 16384  
 X\_prescans = 0  
 X\_resolution = 0.34397631 [Hz]  
 X\_sweep = 5.63570784 [kHz]  
 Irr\_domain = 1H  
 Irr\_freq = 300.52965592 [MHz]  
 Irr\_offset = 5 [ppm]  
 Tri\_domain = 1H  
 Tri\_freq = 300.52965592 [MHz]  
 Tri\_offset = 5 [ppm]  
 Clipped = FALSE  
 Mod\_return = 1  
 Scans = 8  
 Total\_scans = 8  
 X\_90\_width = 12.5 [us]  
 X\_acq\_time = 2.90717696 [s]  
 X\_angle = 45 [deg]  
 X\_atn = 6.4 [dB]  
 X\_pulse = 6.25 [us]  
 Irr\_mode = Off  
 Tri\_mode = Off  
 Dante\_presat = FALSE  
 Initial\_wait = 1 [s]  
 Recvr\_gain = 42  
 Relaxation\_delay = 5 [s]  
 Repetition\_time = 7.90717696 [s]  
 Temp\_get = 24.1 [dc]

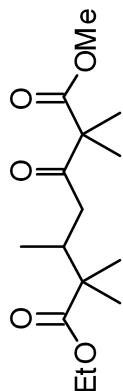

$3\alpha$   $^1\text{H}$  NMR

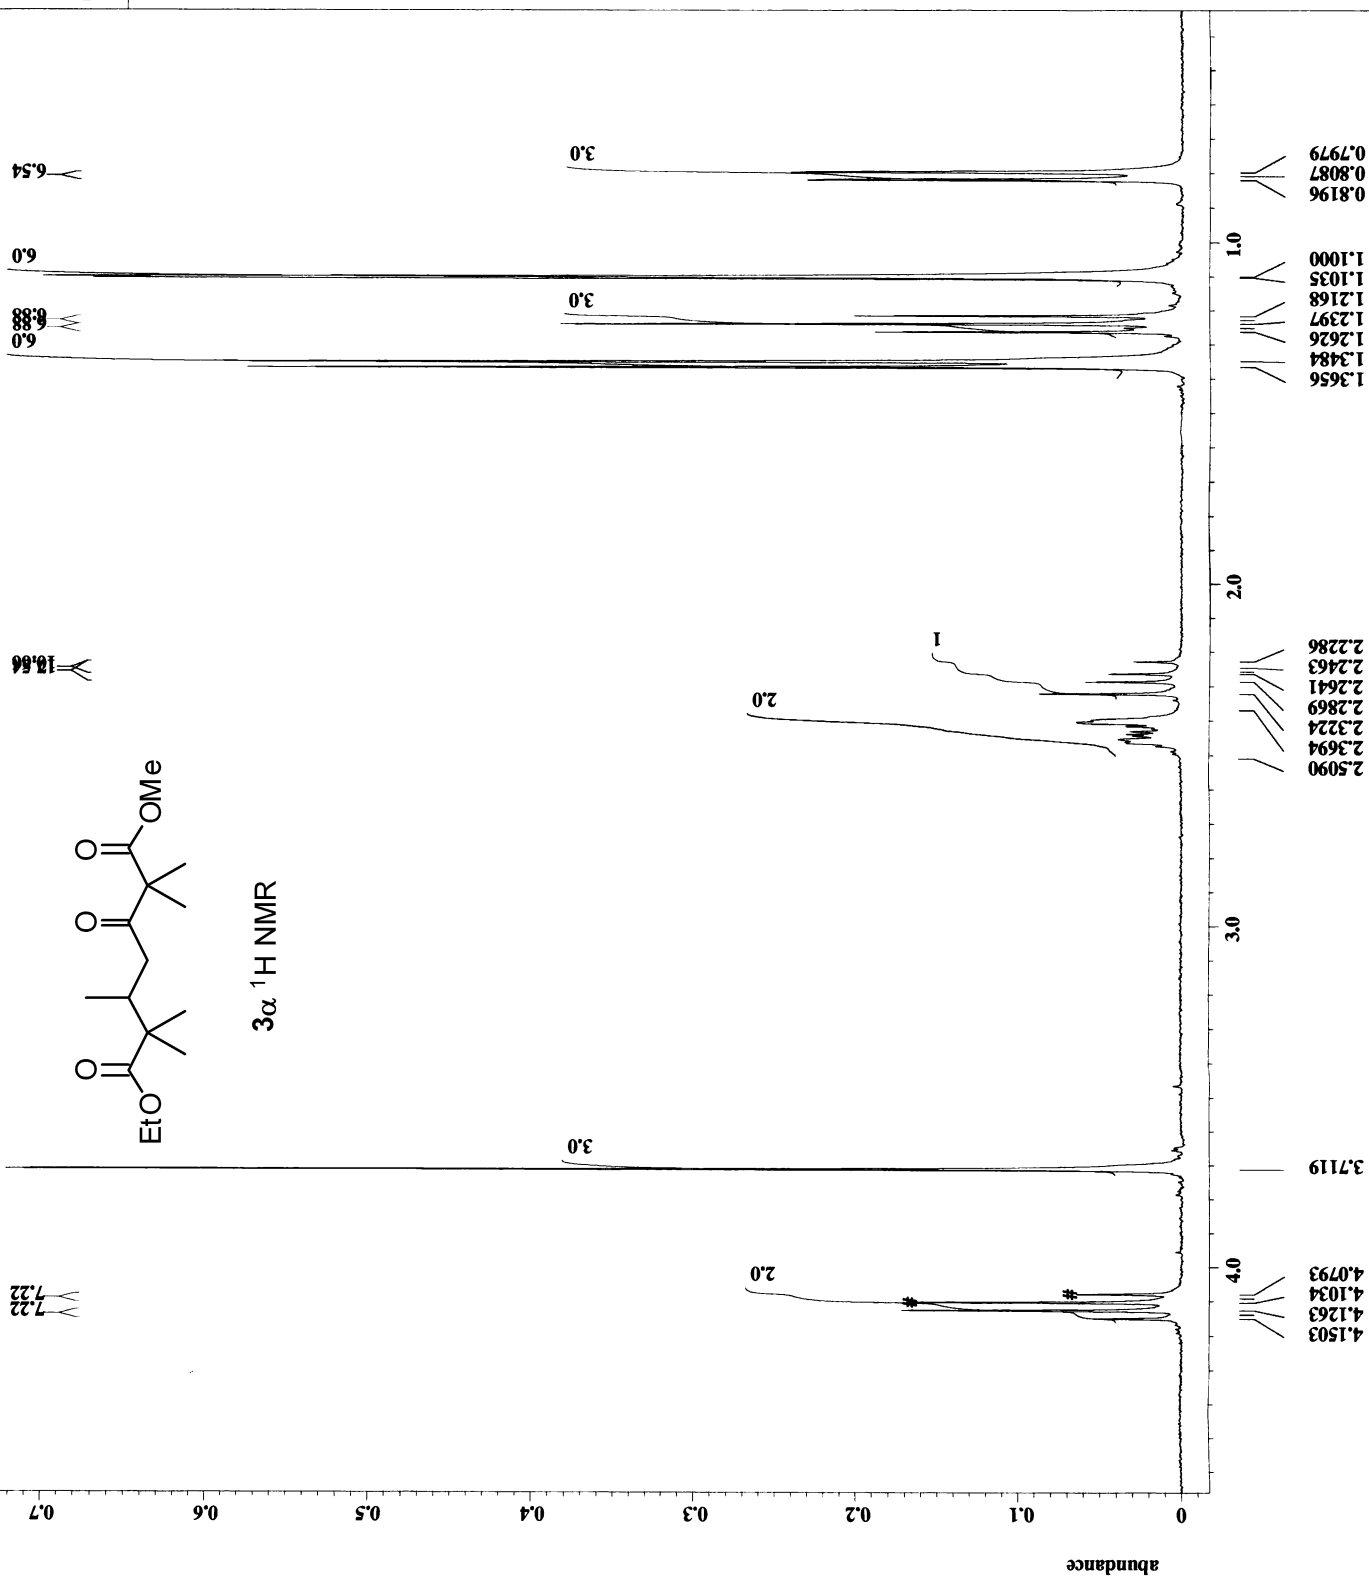

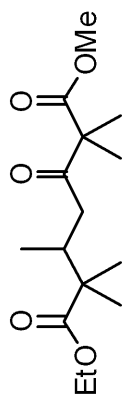

$3\alpha$   $^{13}\text{C}$  NMR

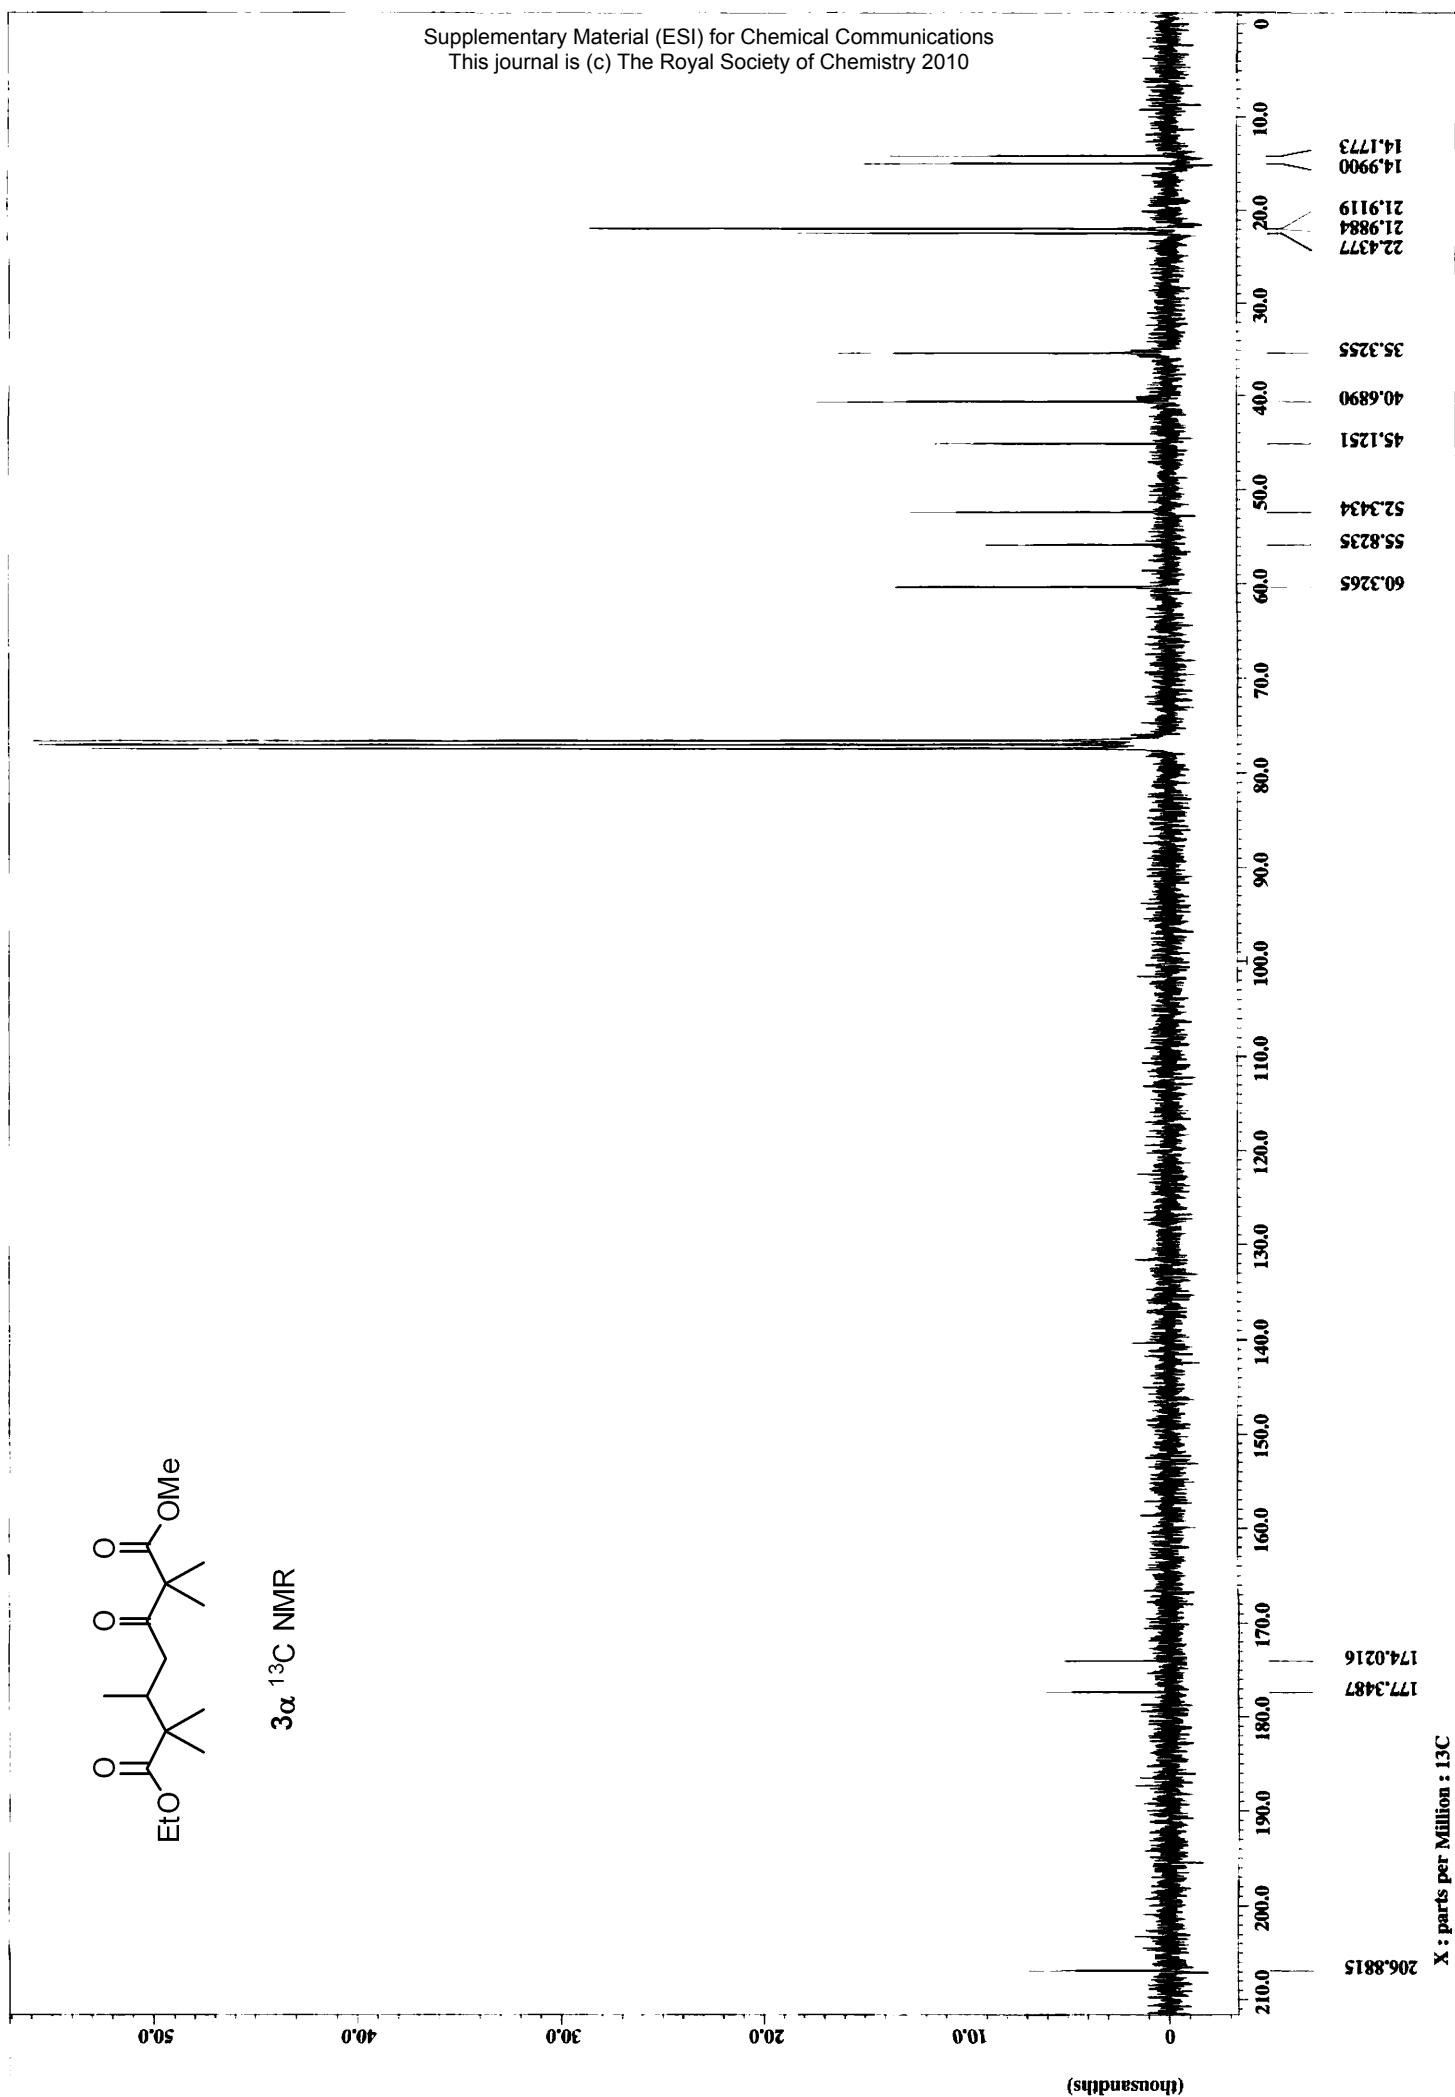

= single\_pulse-13855.jd  
 = delta  
 = single\_pulse.ex2  
 = HT-750-CLM  
 = CHLOROFORM-D  
 = 8-DEC-2009 19:05:57  
 = 8-DEC-2009 19:40:05  
 = 8-DEC-2009 19:40:06  
 = single\_pulse  
 = 1D REAL  
 = 13107  
 = 1H  
 = [ppm]  
 = X  
 = ECA300 (2 JMT30-2)  
 = DELTA2\_NMR  
 = 7.0586013[T] (300[MHz]  
 = 2.90717696[s]  
 = 1H  
 = 300.52965592[MHz]  
 = 5[ppm]  
 = 16384  
 = 0  
 = 0.34397631[Hz]  
 = 5.63570784[kHz]  
 = 1H  
 = 300.52965592[MHz]  
 = 5[ppm]  
 = 1H  
 = 300.52965592[MHz]  
 = 5[ppm]  
 = FALSE  
 = 1  
 = 8  
 = 8  
 = 11.4[us]  
 = 2.90717696[s]  
 = 45[deg]  
 = 6.4[ds]  
 = 5.7[us]  
 = Off  
 = Off  
 = FALSE  
 = 1[s]  
 = 42  
 = 5[s]  
 = 7.90717696[s]  
 = 25.2[dc]

Filename  
 Author  
 Experiment  
 Sample\_id  
 Solvent  
 Creation\_time  
 Revision\_time  
 Current\_time  
 Comment  
 Data\_format  
 Dim\_size  
 Dim\_title  
 Dim\_units  
 Dimensions  
 Site  
 Spectrometer  
 Field\_strength  
 X\_acq\_duration  
 X\_domain  
 X\_freq  
 X\_offset  
 X\_points  
 X\_prescans  
 X\_resolution  
 X\_sweep  
 Irr\_domain  
 Irr\_freq  
 Irr\_offset  
 Tri\_domain  
 Tri\_freq  
 Tri\_offset  
 Clipped  
 Mod\_return  
 Scans  
 Total\_scans  
 X\_90\_width  
 X\_acq\_time  
 X\_angle  
 X\_atn  
 X\_pulse  
 Irr\_mode  
 Tri\_mode  
 Dante\_presat  
 Initial\_wait  
 Recvr\_gain  
 Relaxation\_delay  
 Repetition\_time  
 Temp\_get

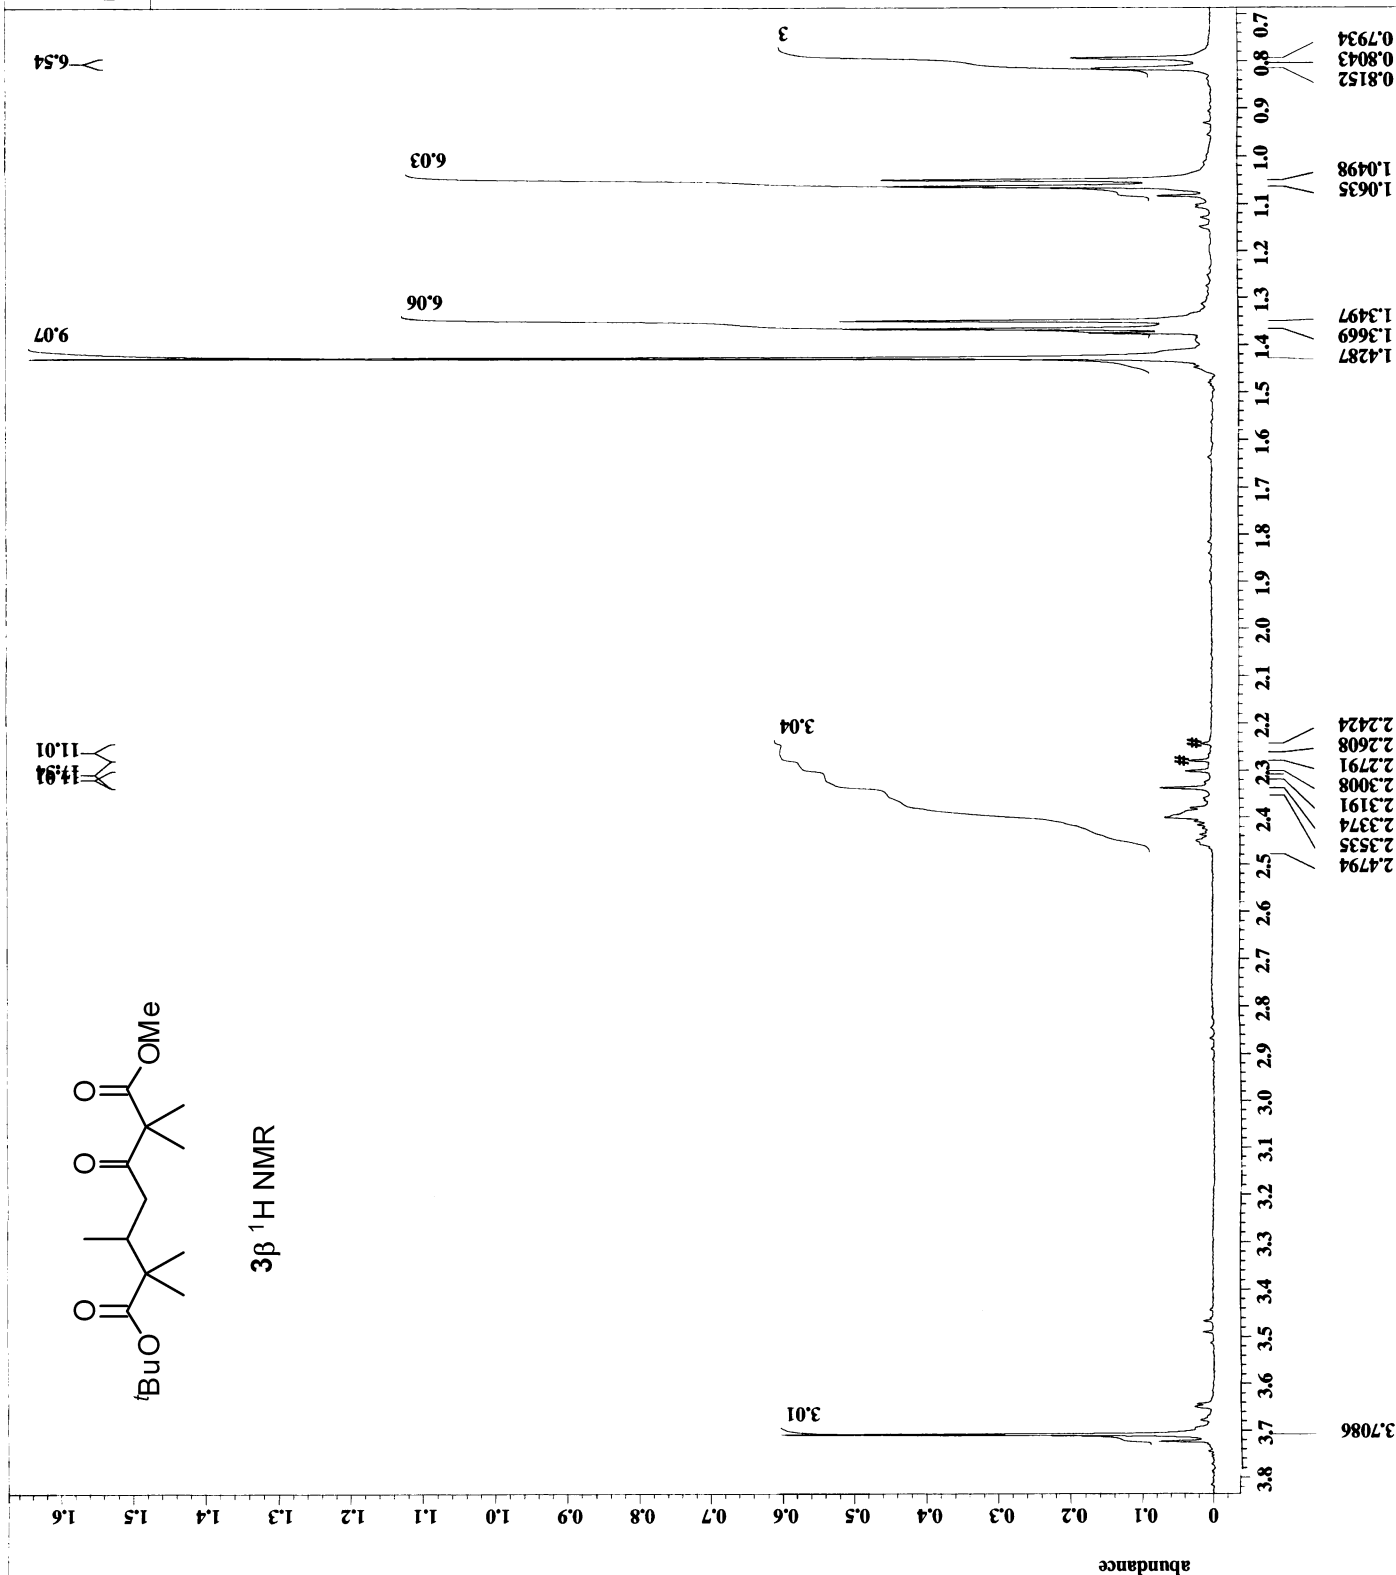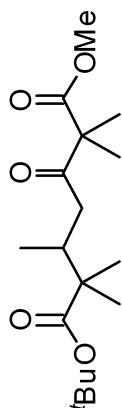

3β <sup>1</sup>H NMR

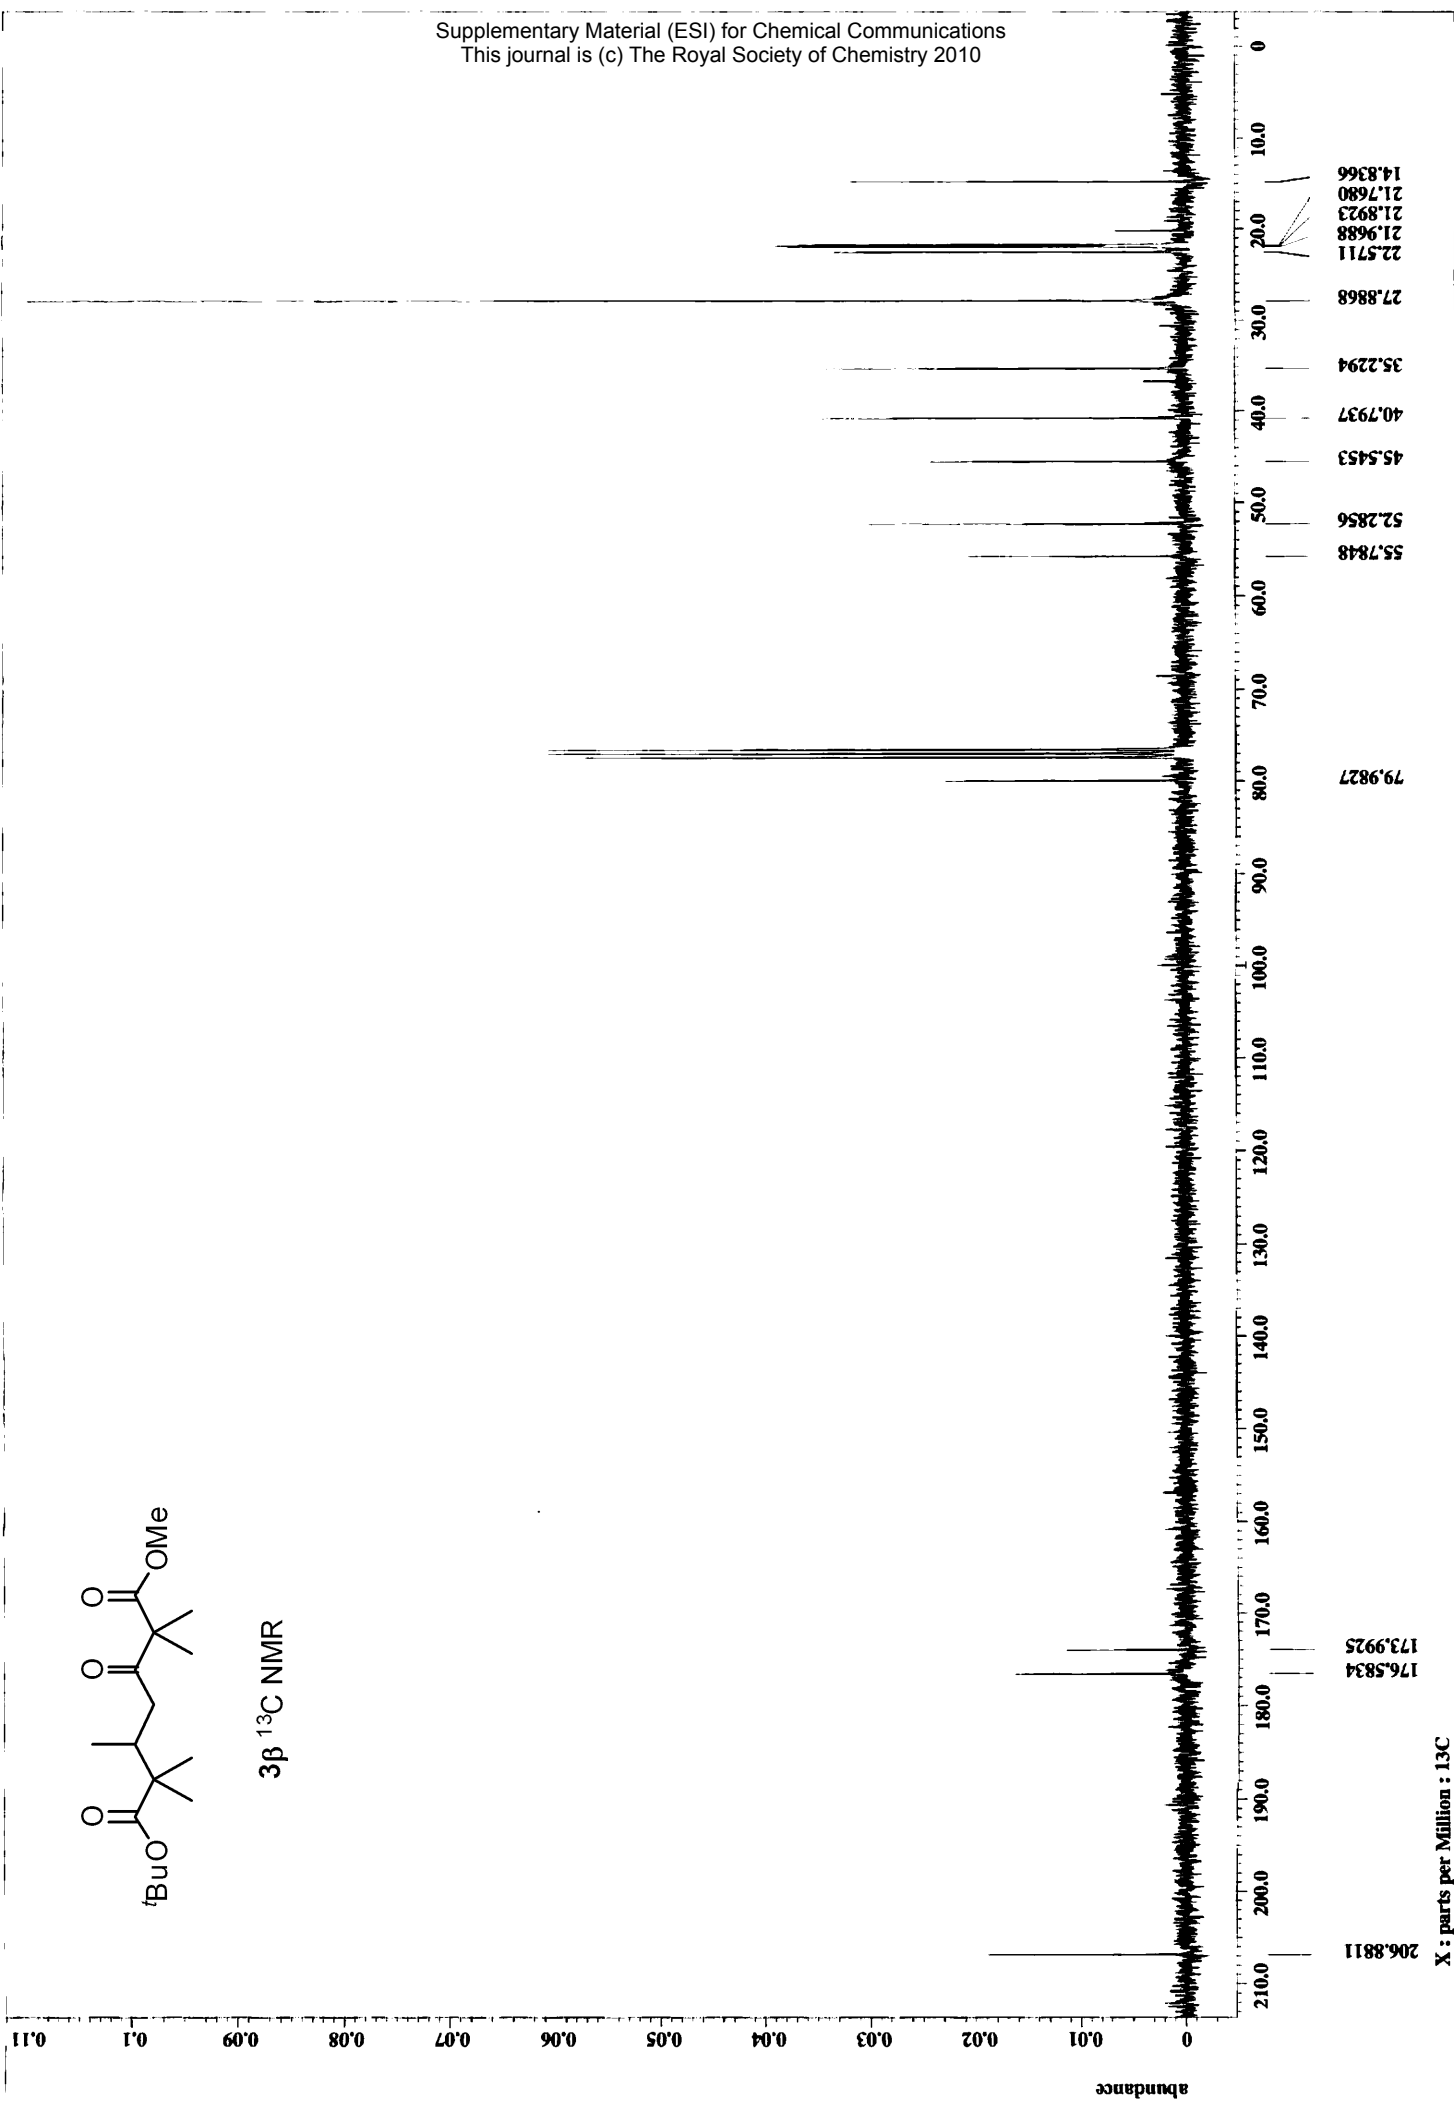

Supplement: c0cc01110jb.pdf [file c0cc01110jb.pdf]
